# Supplementary material for: Motifs in Natural Products as Useful Scaffolds to Obtain Novel Benzo[d]imidazole-Based Cannabinoid Type 2 (CB2) Receptor Agonists
Source: MDPI journal article supplement (doi:10.3390/ijms241310918), 2023-06-30

**Motifs in natural products as useful scaffolds to obtain novel benzo[*d*]imidazole-based cannabinoid type 2 (CB2) receptor agonists**

**Analia Young Hwa Cho<sup>1</sup>, Hery Chung<sup>1</sup>, Javier Romero-Parra<sup>2</sup>, Poulami Kumar<sup>3</sup>, Marco Allarà<sup>3</sup>, Alessia Ligresti<sup>3</sup>, Carlos Gallardo-Garrido<sup>1</sup>, Hernán Pessoa-Mahana<sup>2</sup>, Mario Faúndez<sup>1</sup>, Carlos David Pessoa-Mahana<sup>1,\*</sup>**

<sup>1</sup> Pharmacy Department, Faculty of Chemistry, Pontificia Universidad Católica de Chile, Vicuña Mackenna 4860, Santiago 7820436, Chile; cpessoa@uc.cl

<sup>2</sup> Organic Chemistry and Physical Chemistry Department, Faculty of Chemical and Pharmaceutical Sciences, Universidad de Chile, Olivos 1007, Santiago 7820436, Chile

<sup>3</sup> National Research Council of Italy, Institute of Biomolecular Chemistry, 80078 Pozzuoli, Italy

\* Correspondence: cpessoa@uc.cl

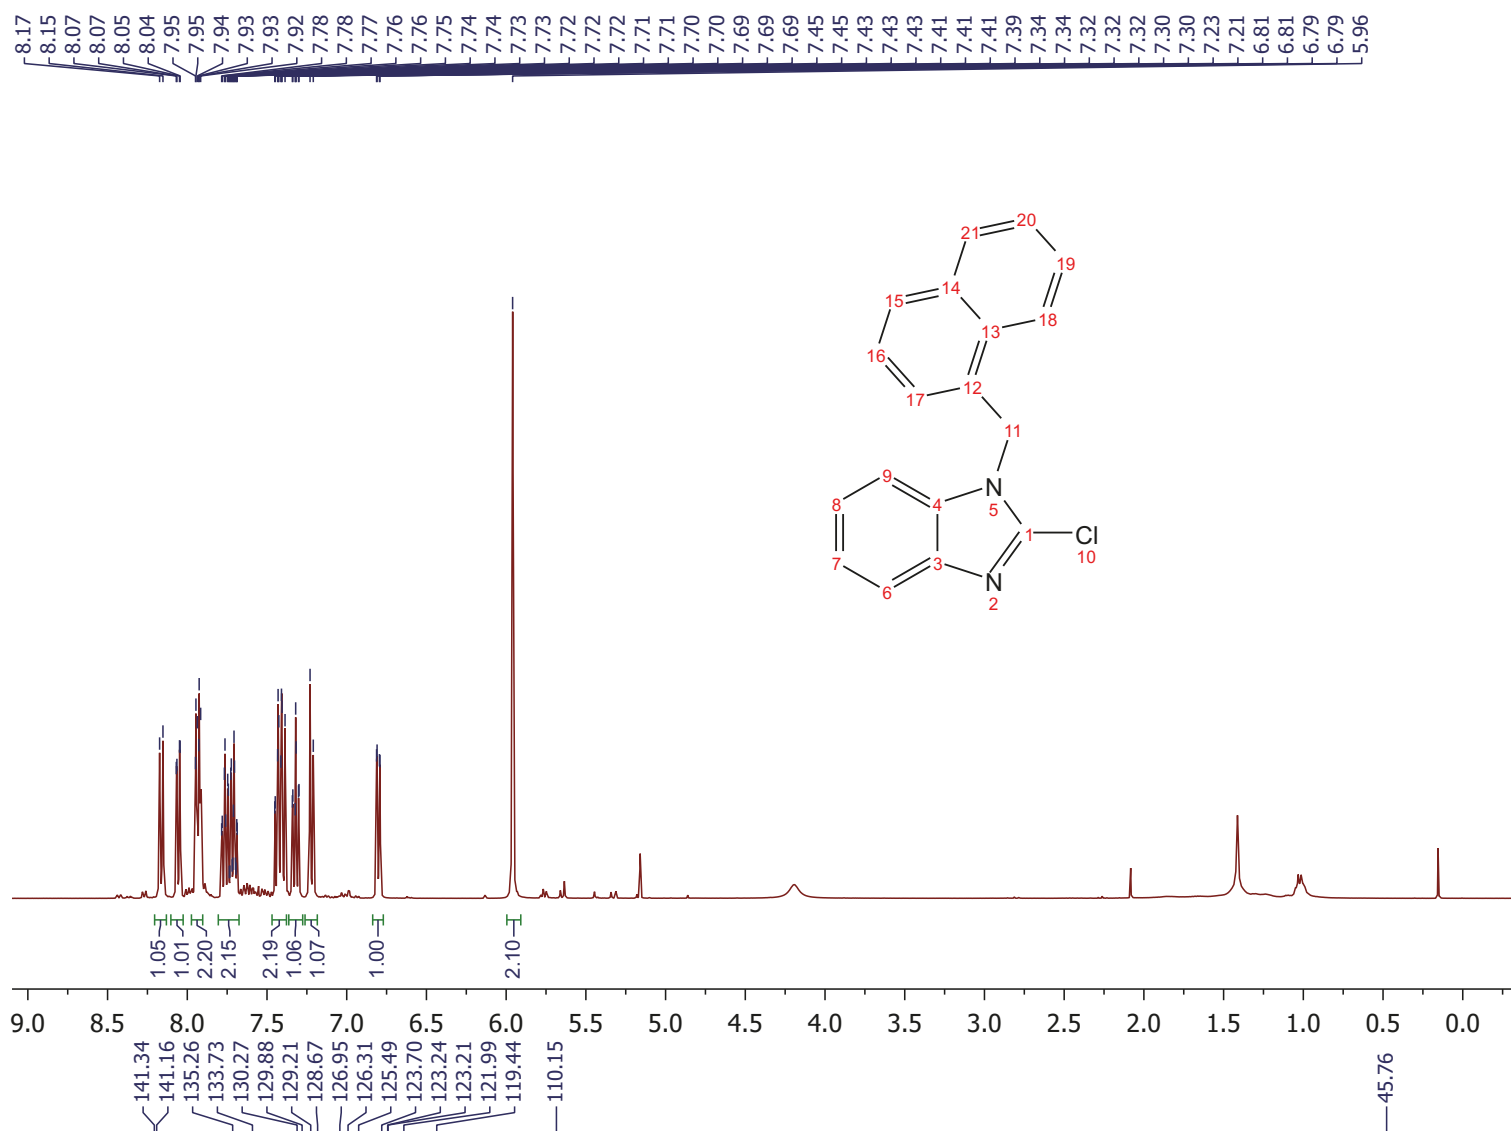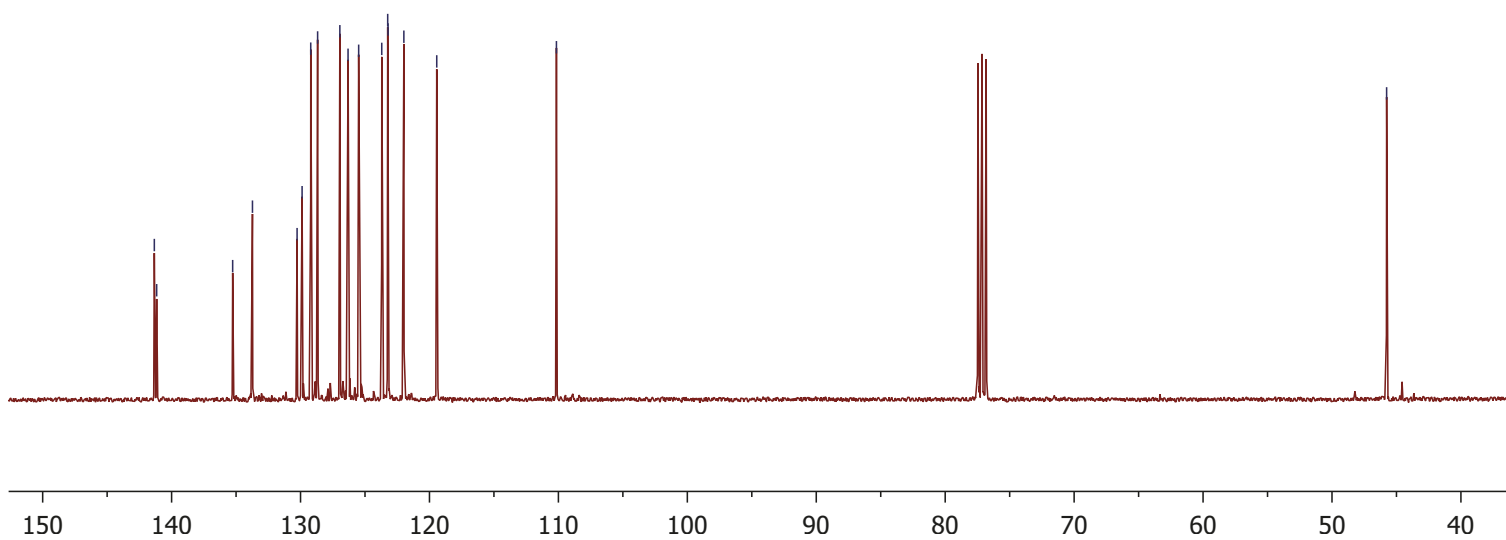

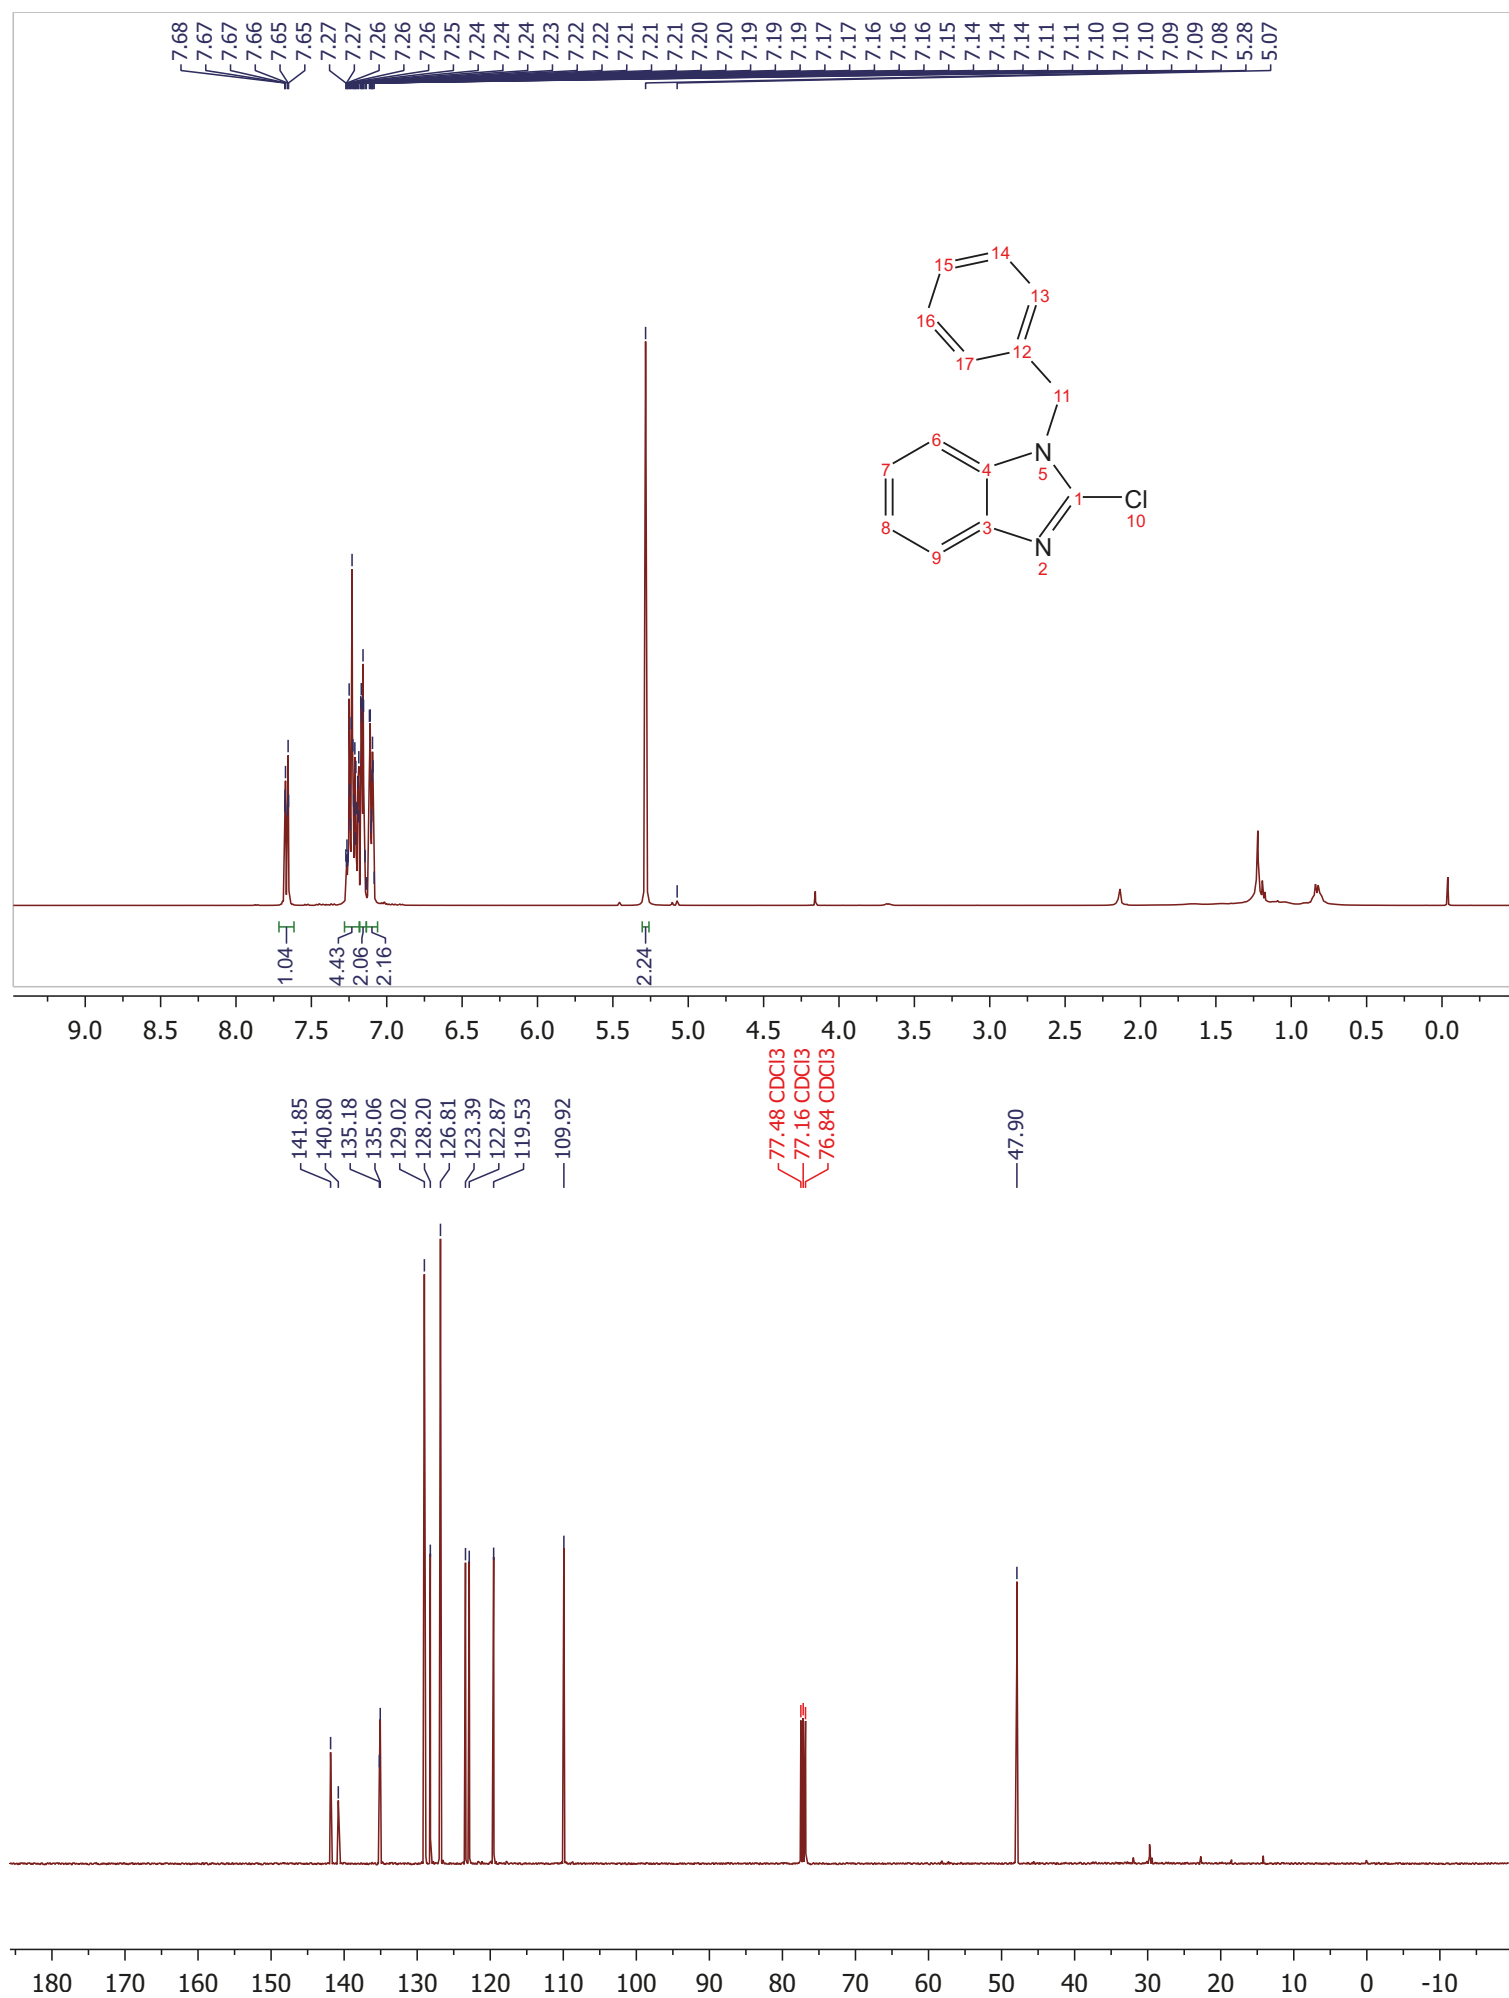

7.61  
7.59  
7.31  
7.29  
7.27  
7.26  
7.24  
7.22

4.30  
4.28  
4.26  
4.24

3.38 H<sub>2</sub>O

2.50 DMSO-d<sub>6</sub>

1.32  
1.30  
1.28

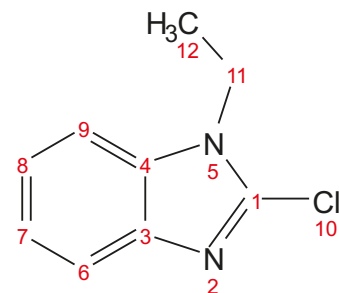

1.91

2.00

2.07

3.10

141.69  
139.83

134.97

123.35  
122.78

119.09

110.81

40.62 DMSO  
40.41 DMSO  
40.21 DMSO  
40.00 DMSO  
39.79 DMSO  
39.58 DMSO  
39.43  
39.37 DMSO

14.89

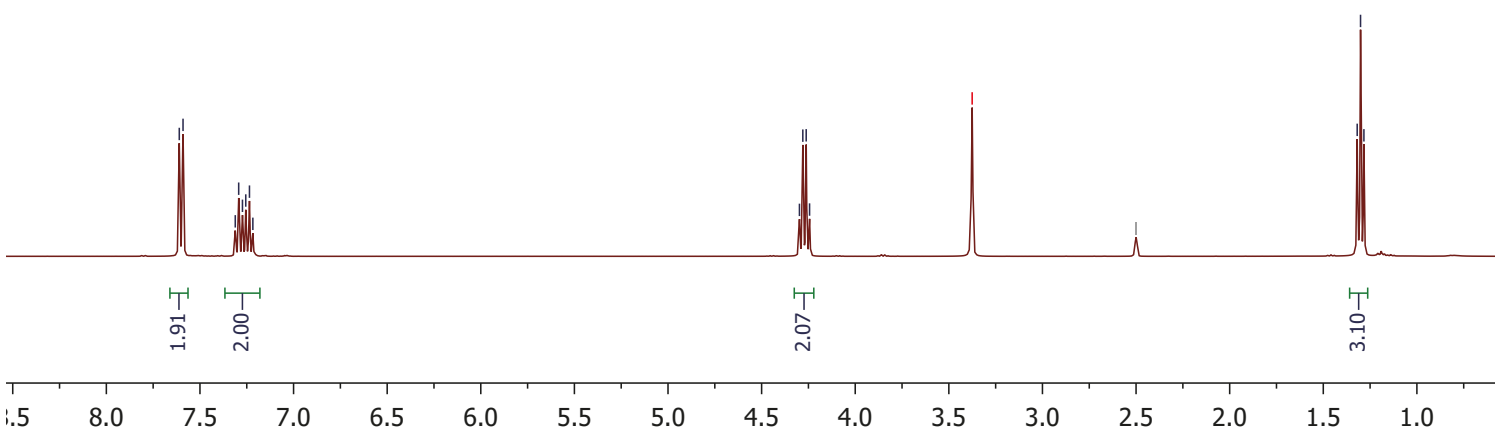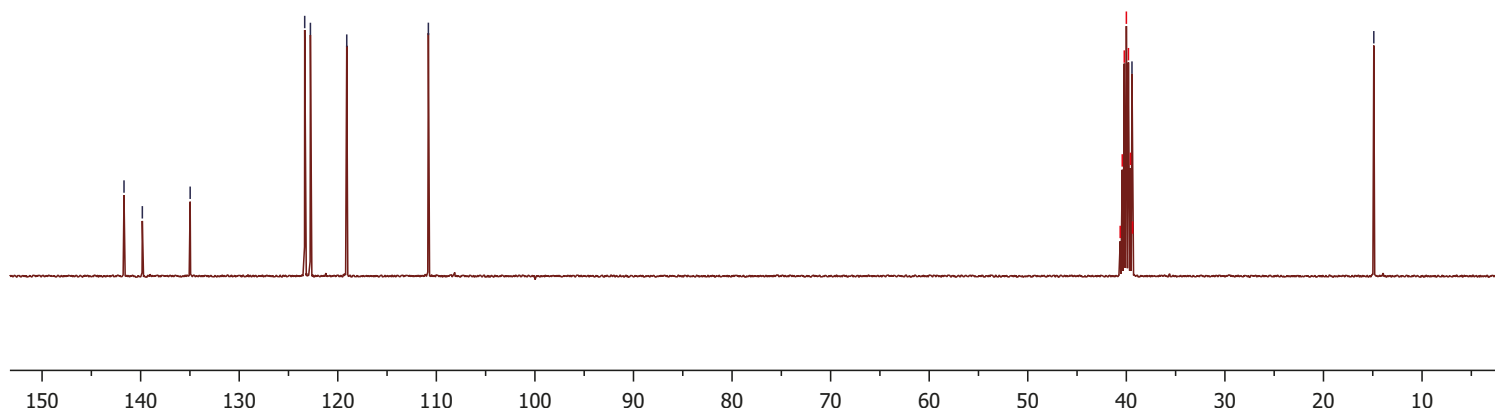

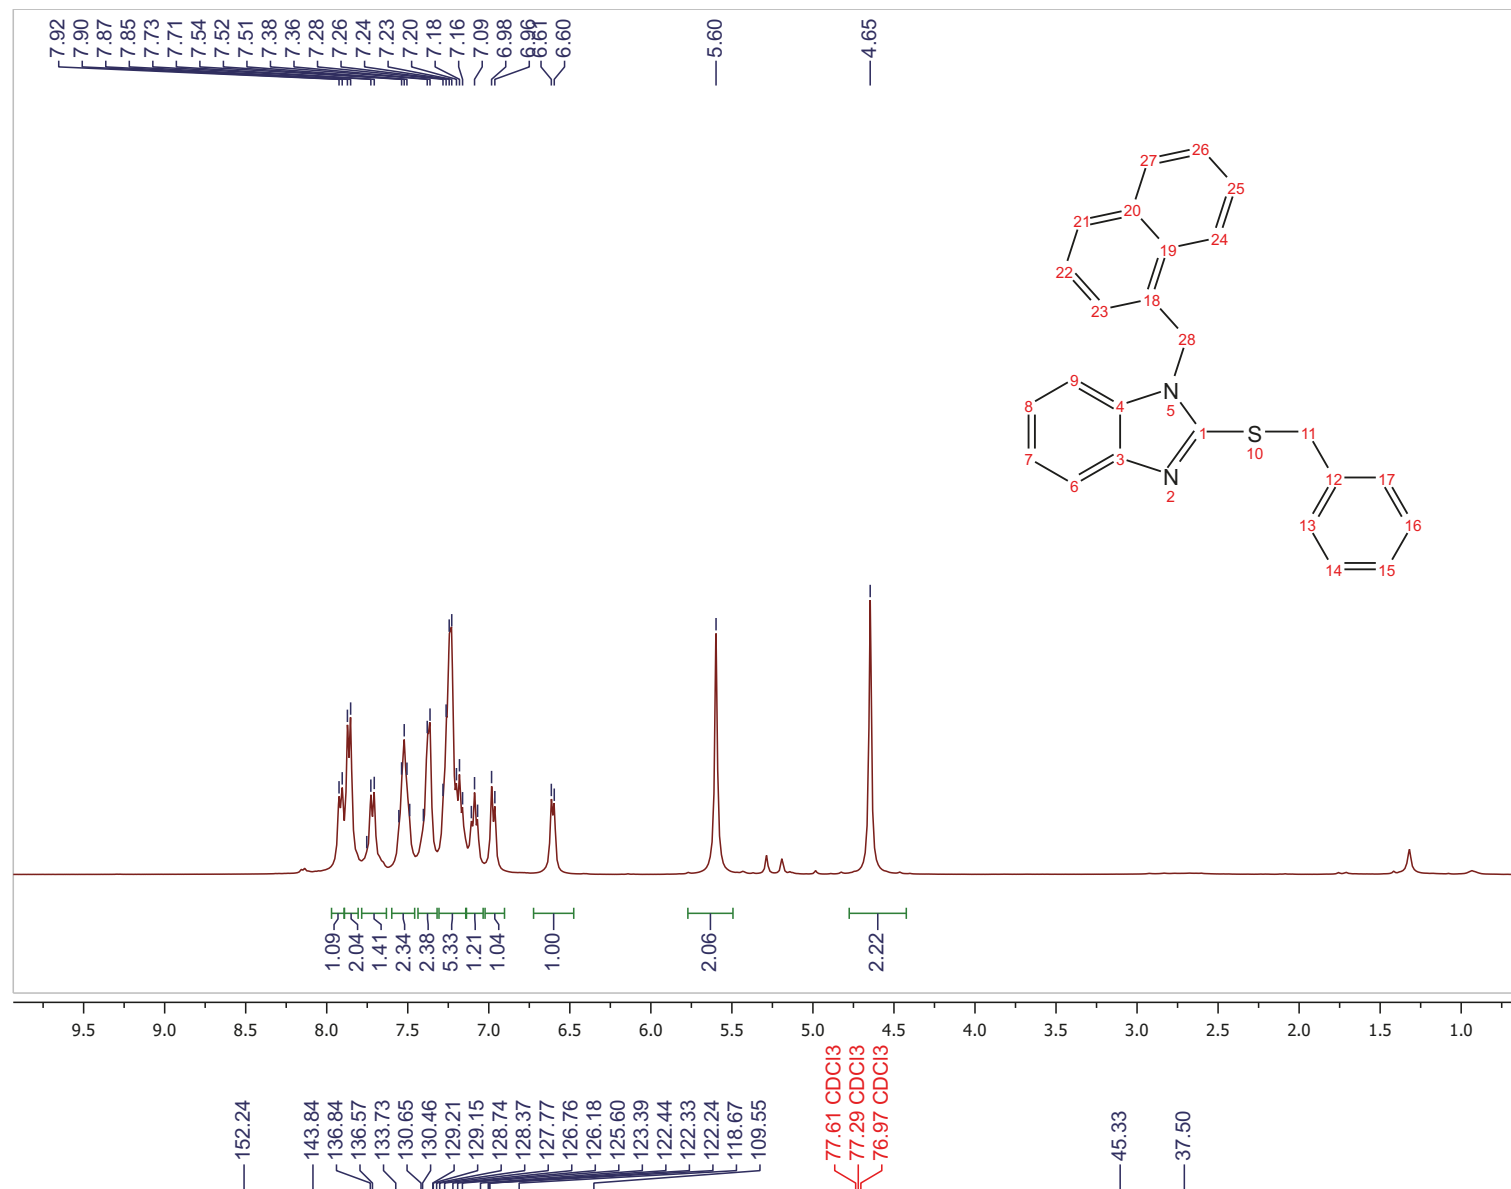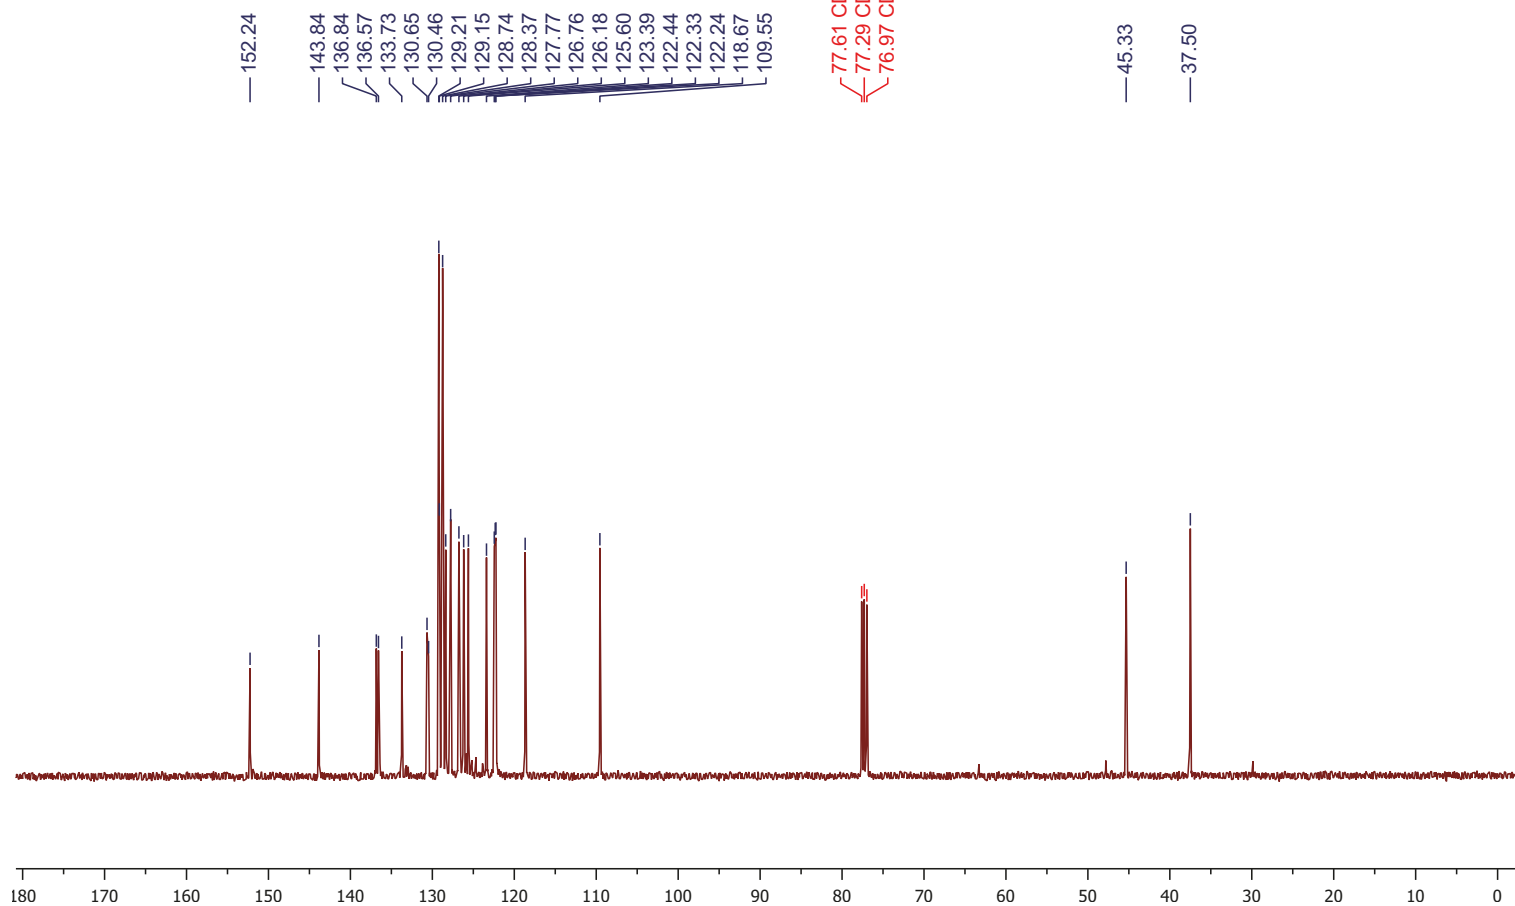

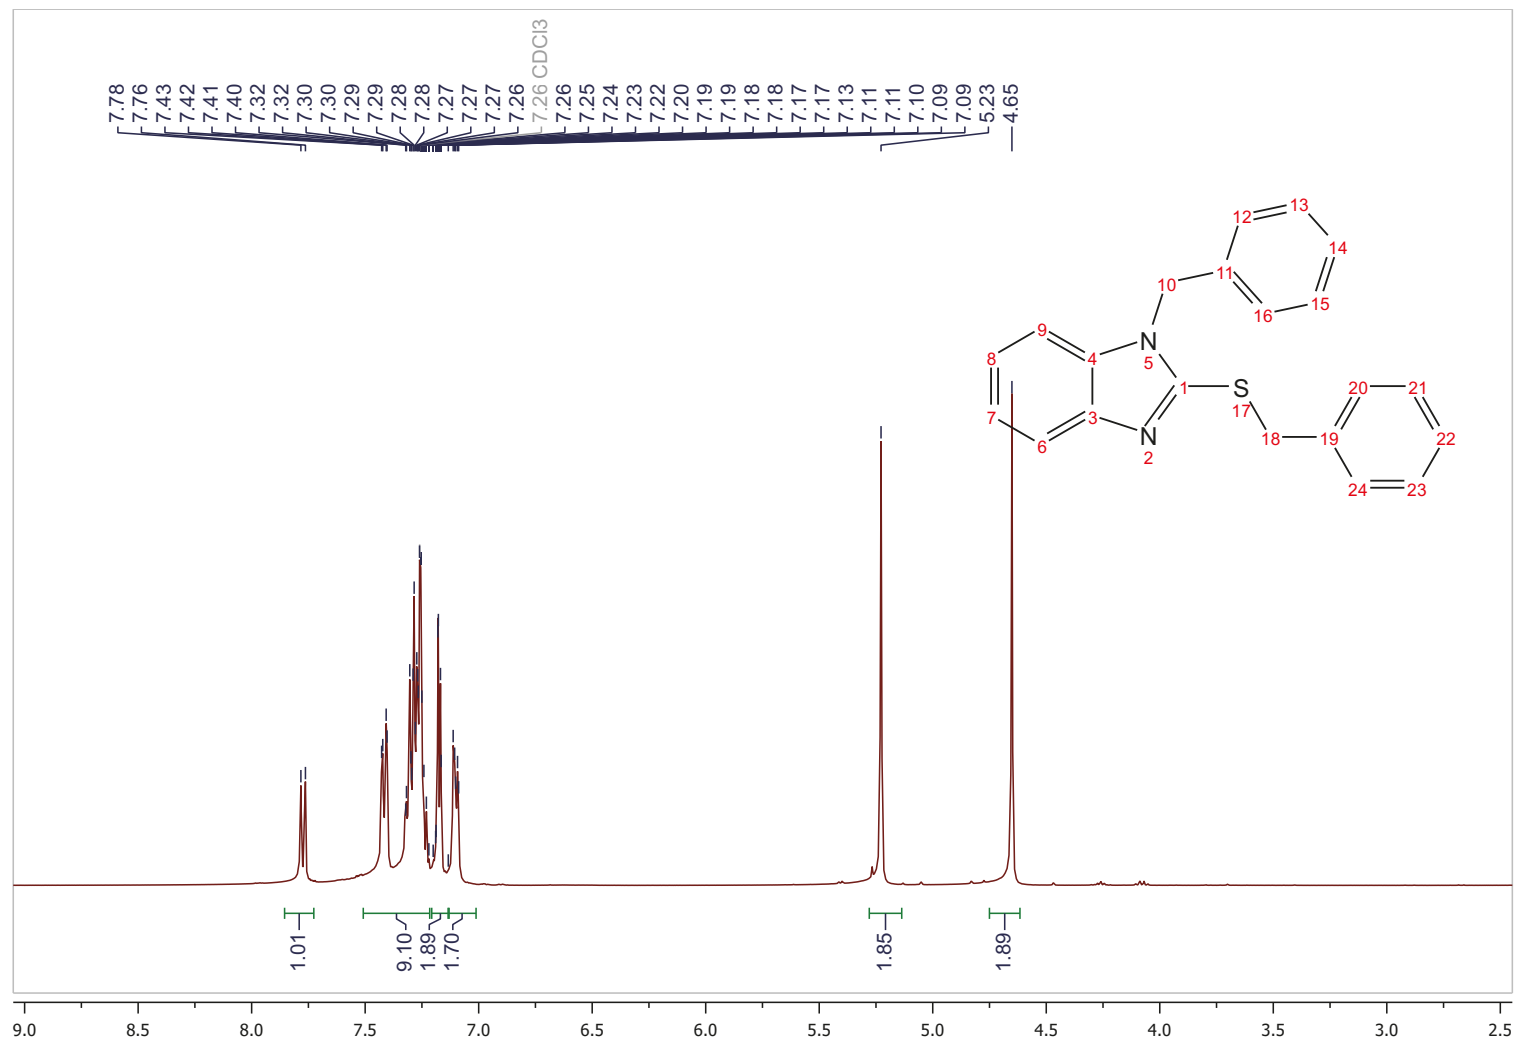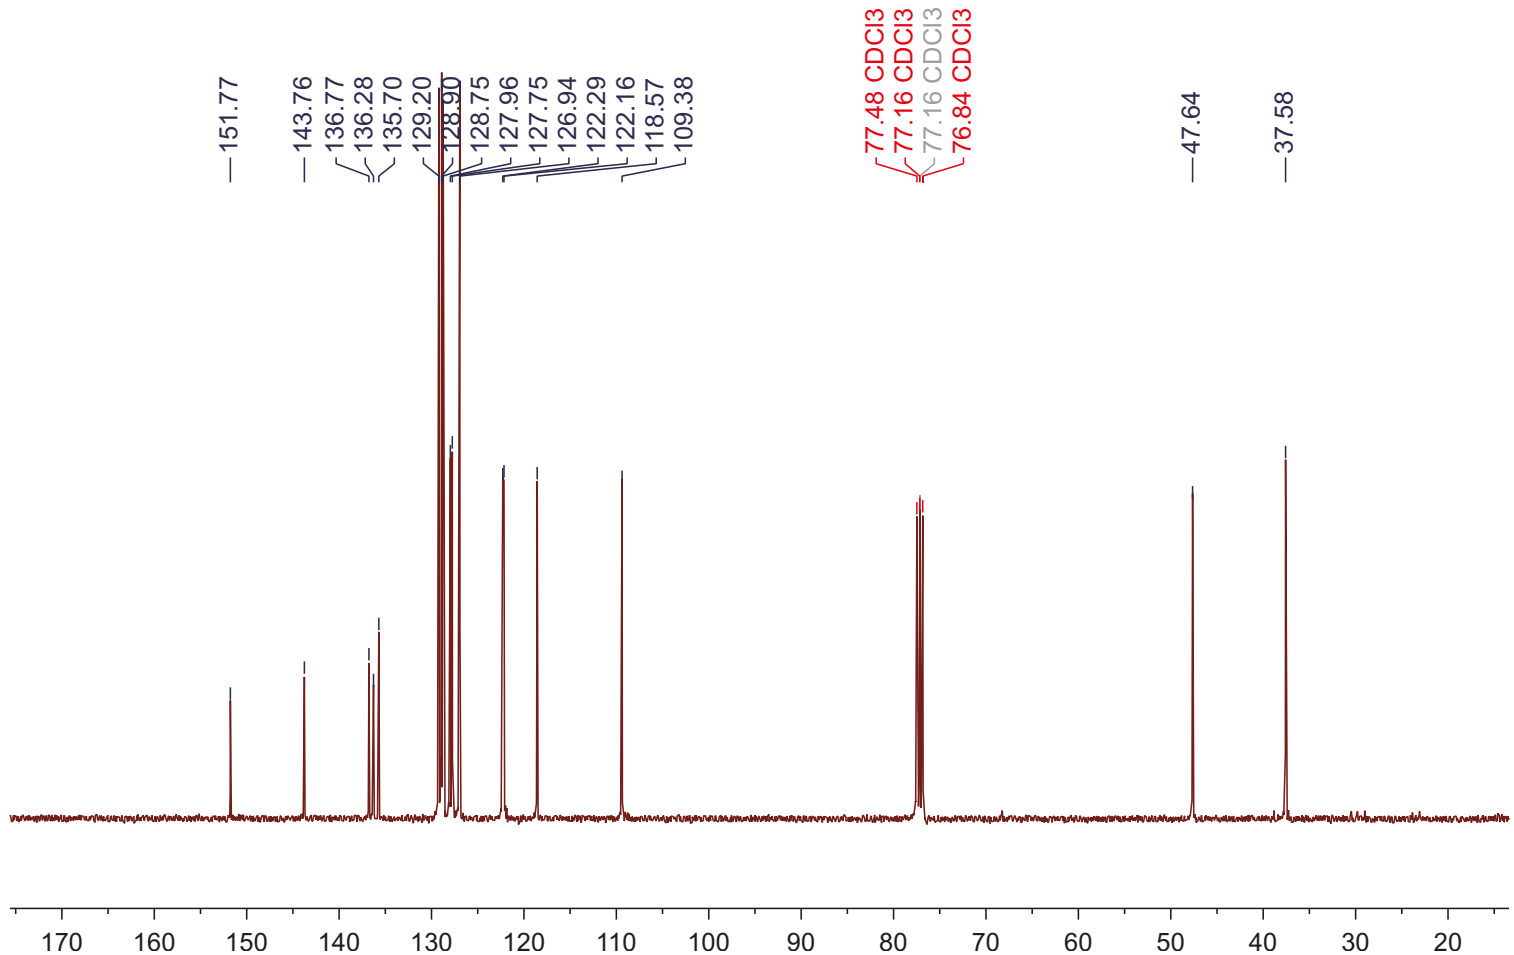

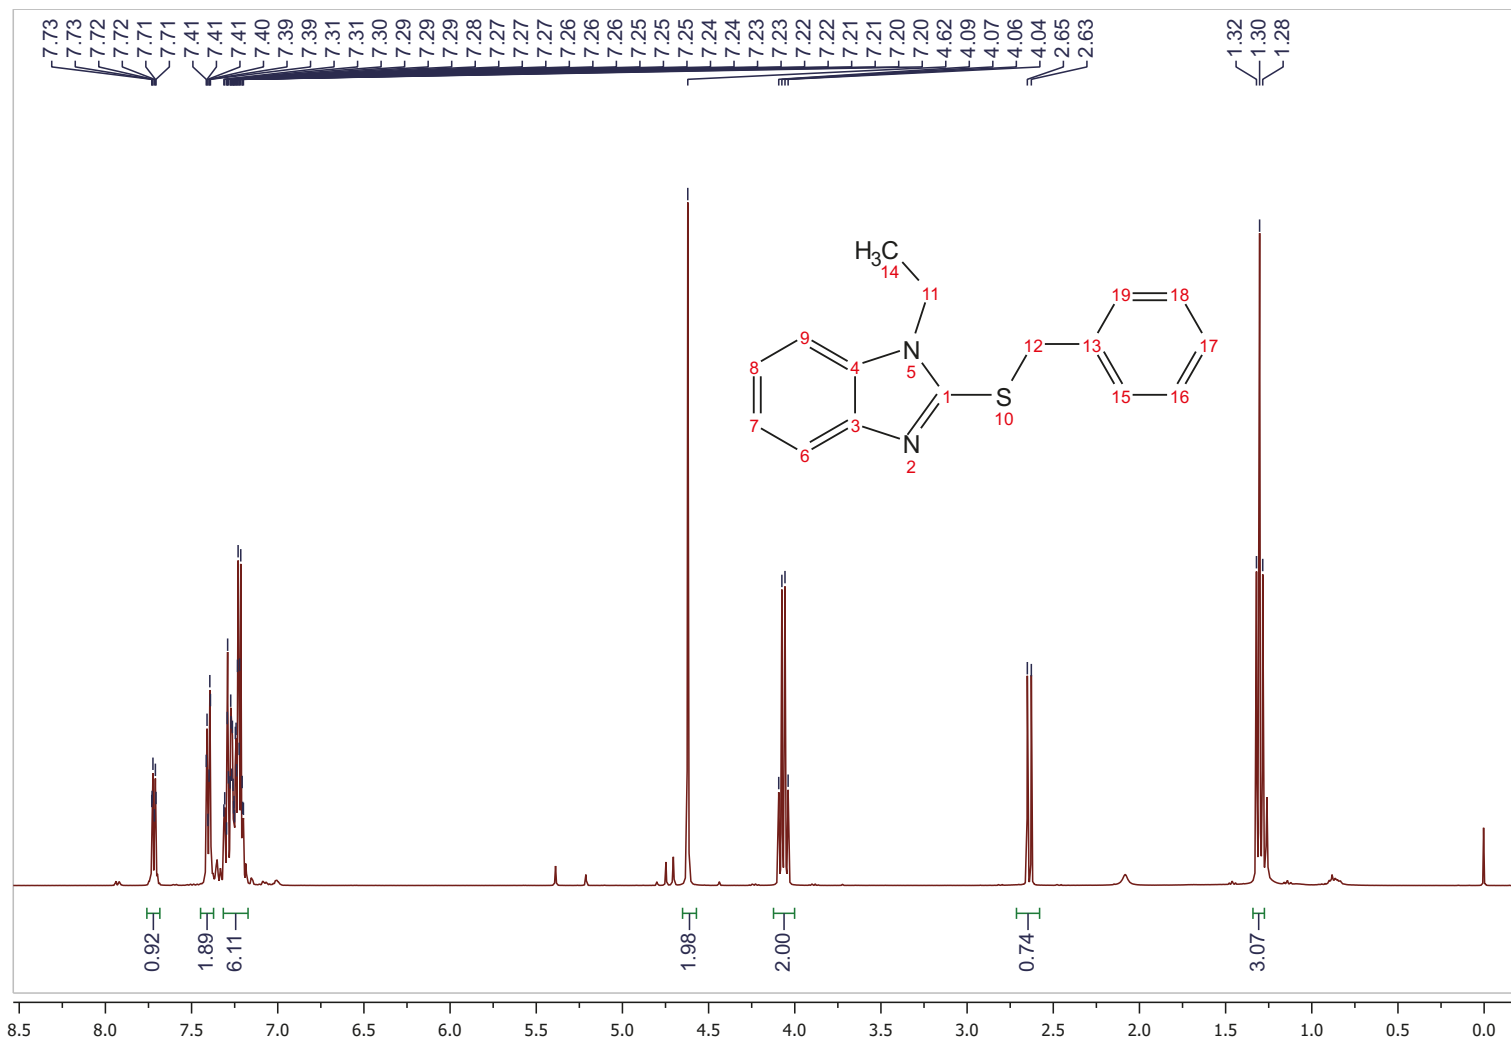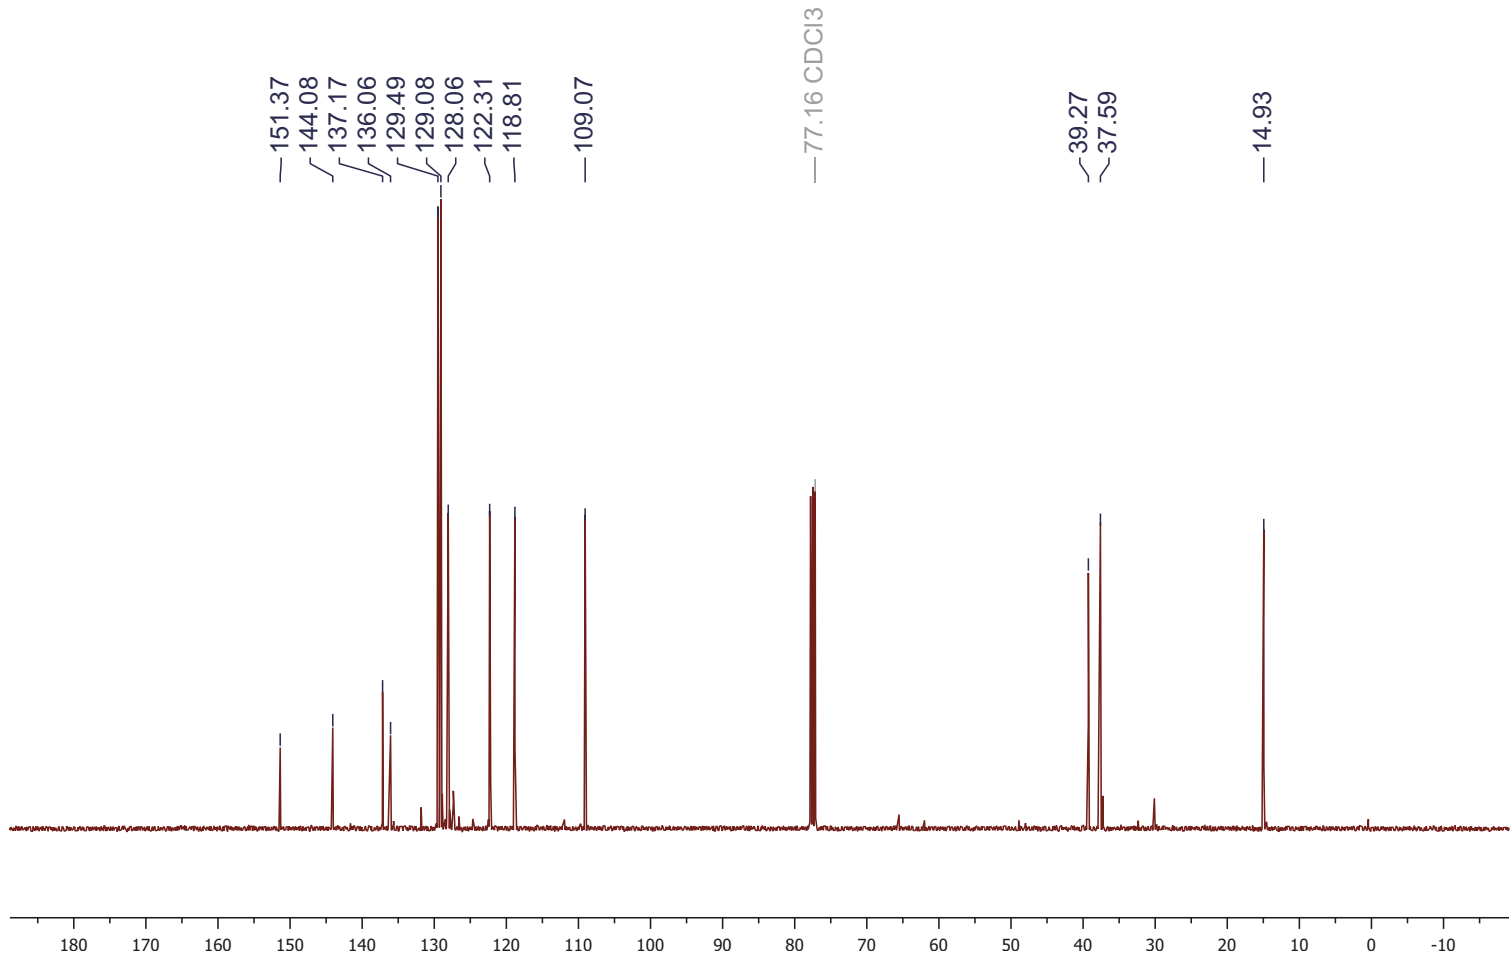

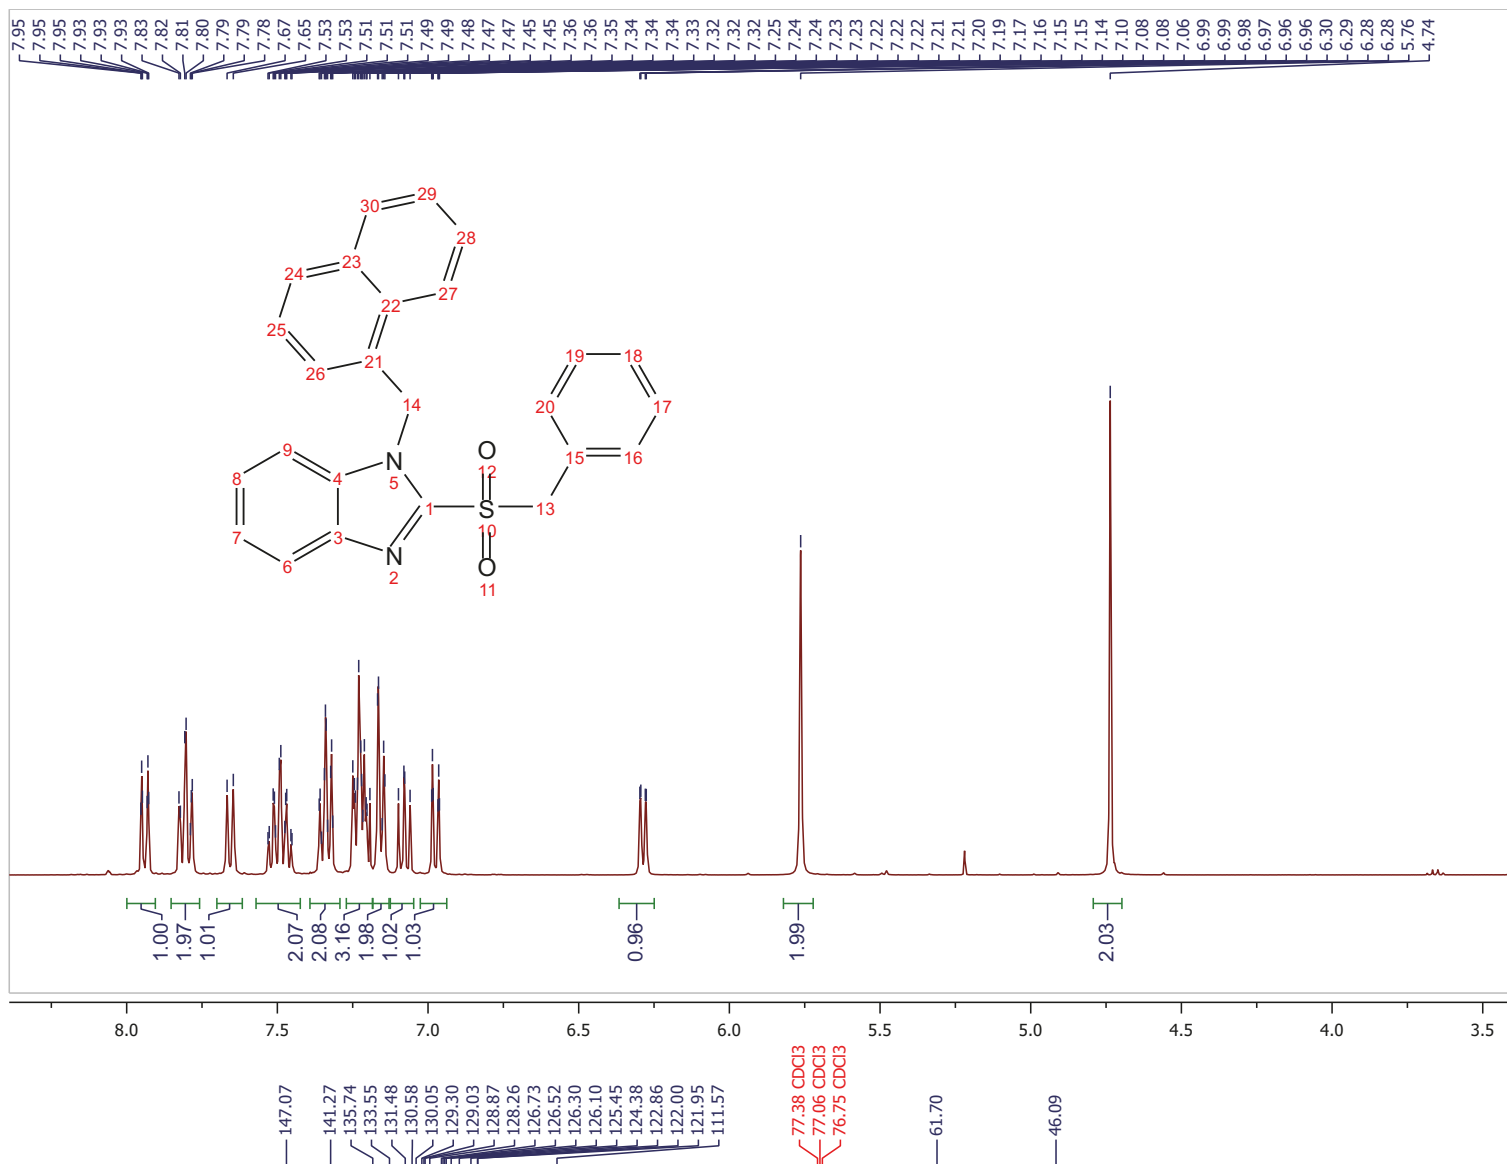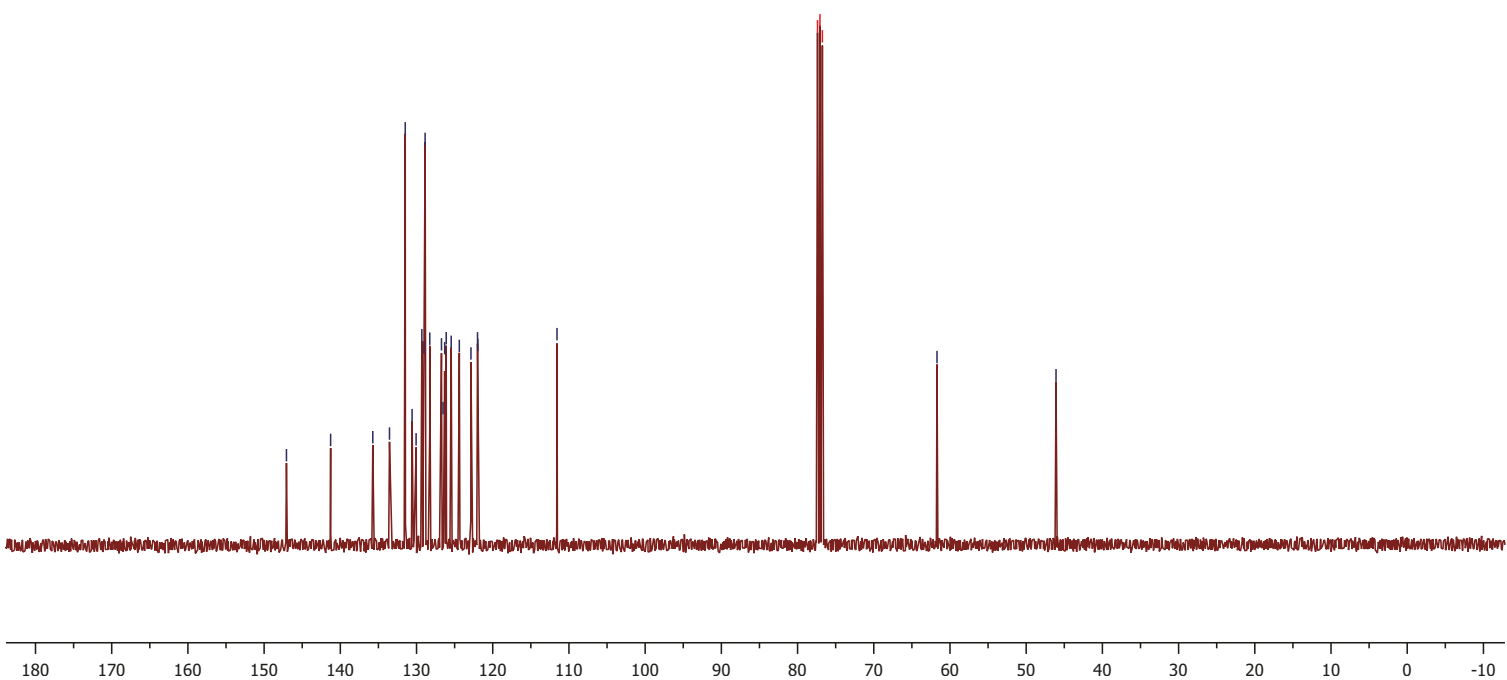



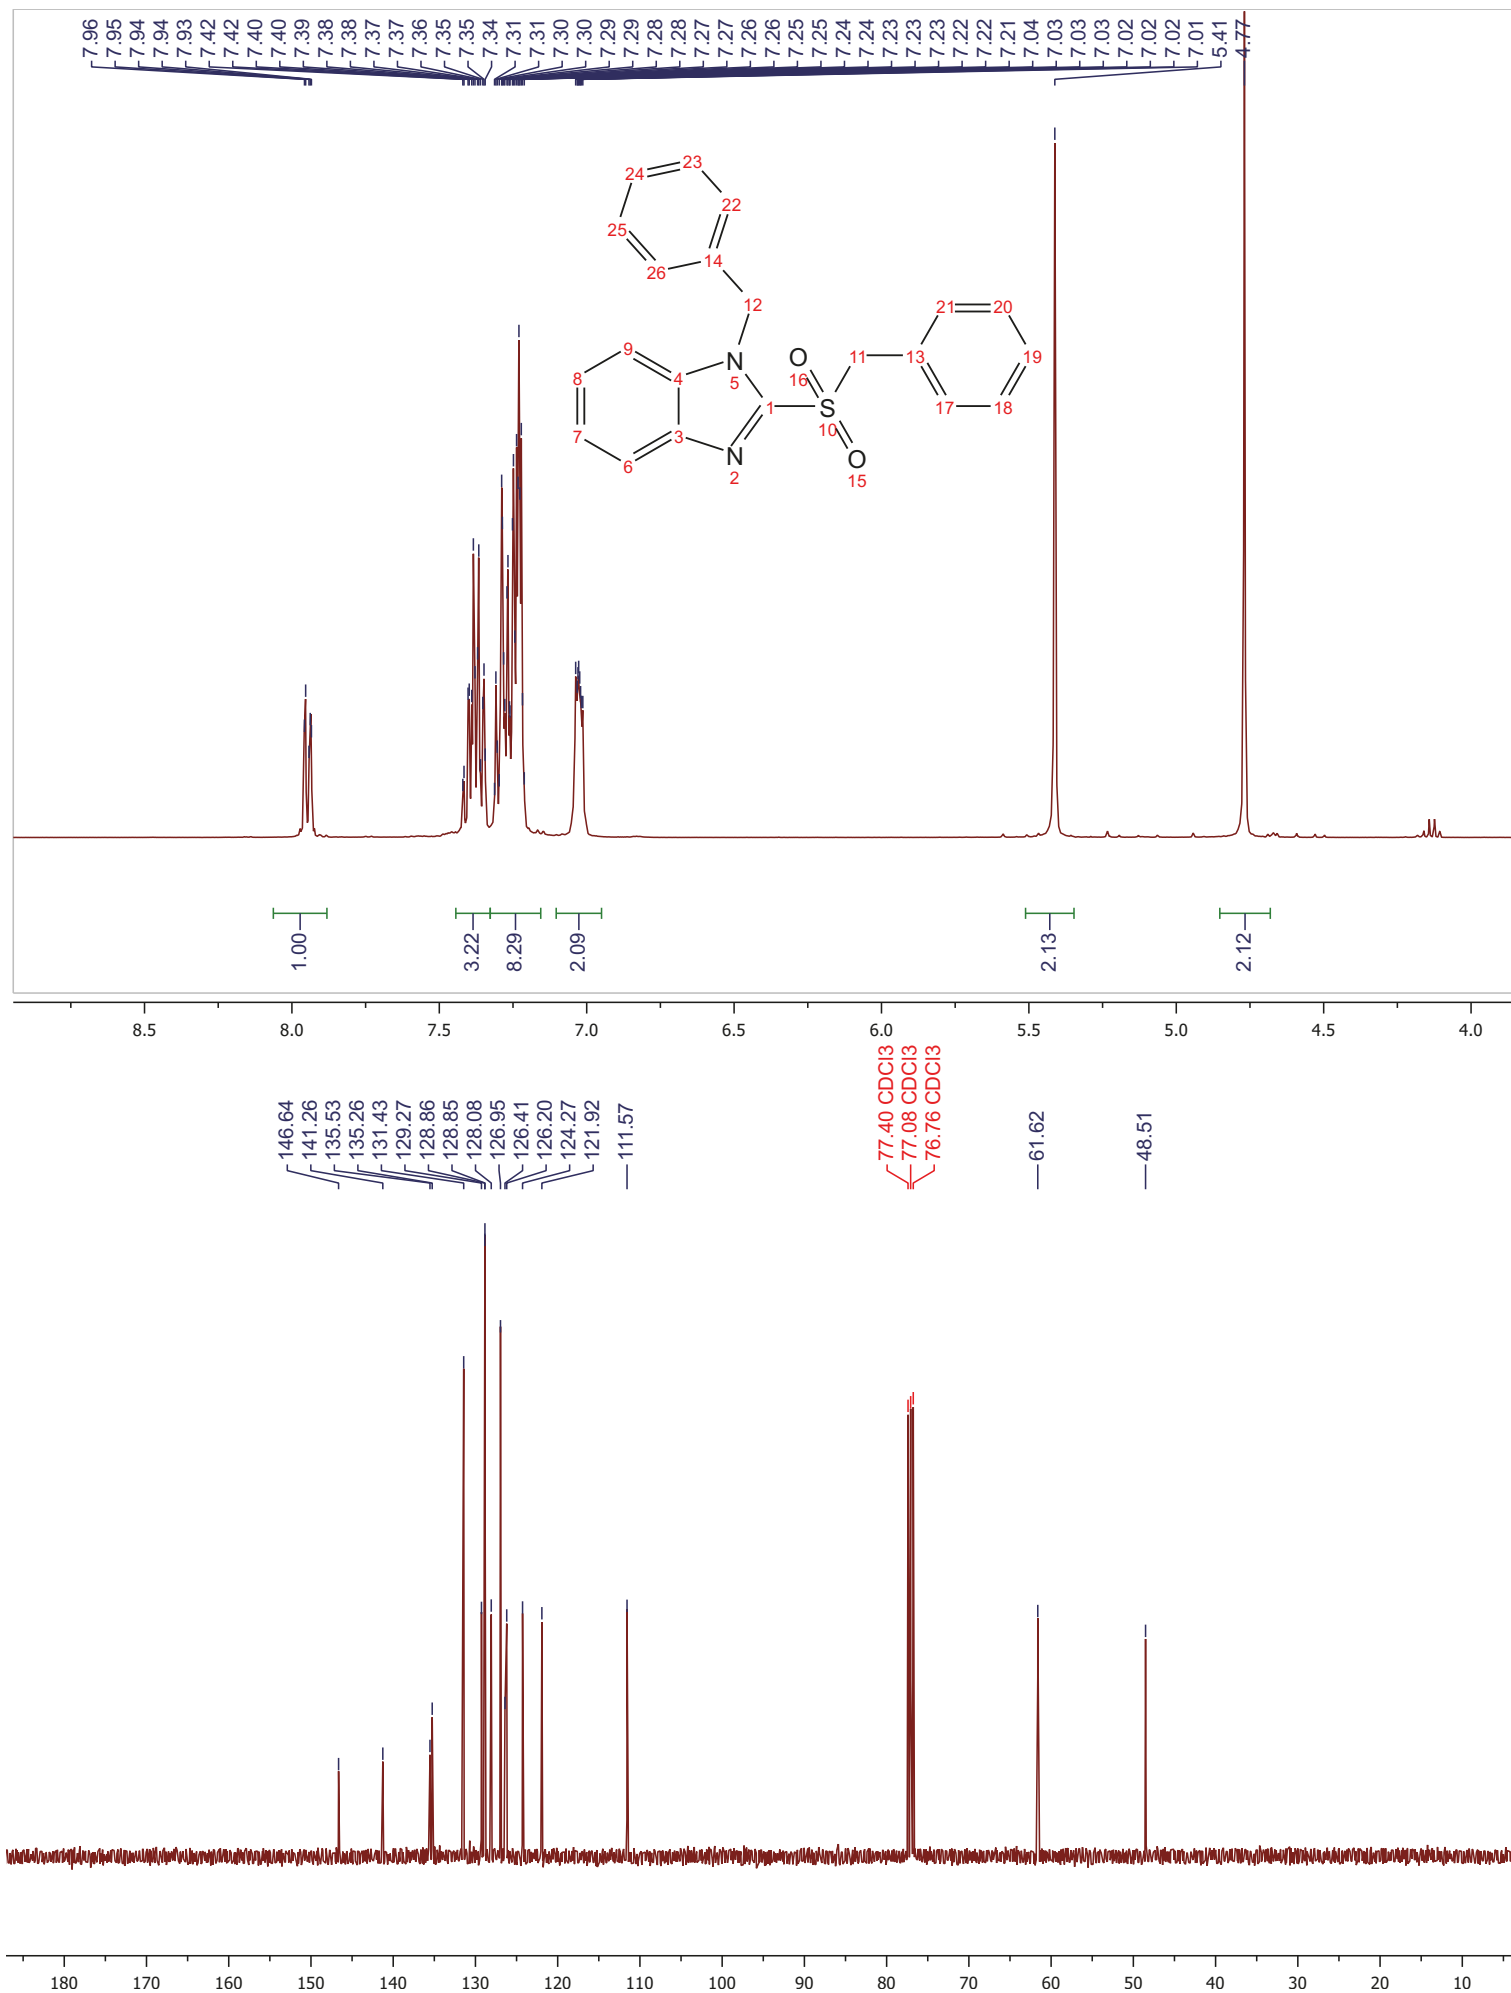

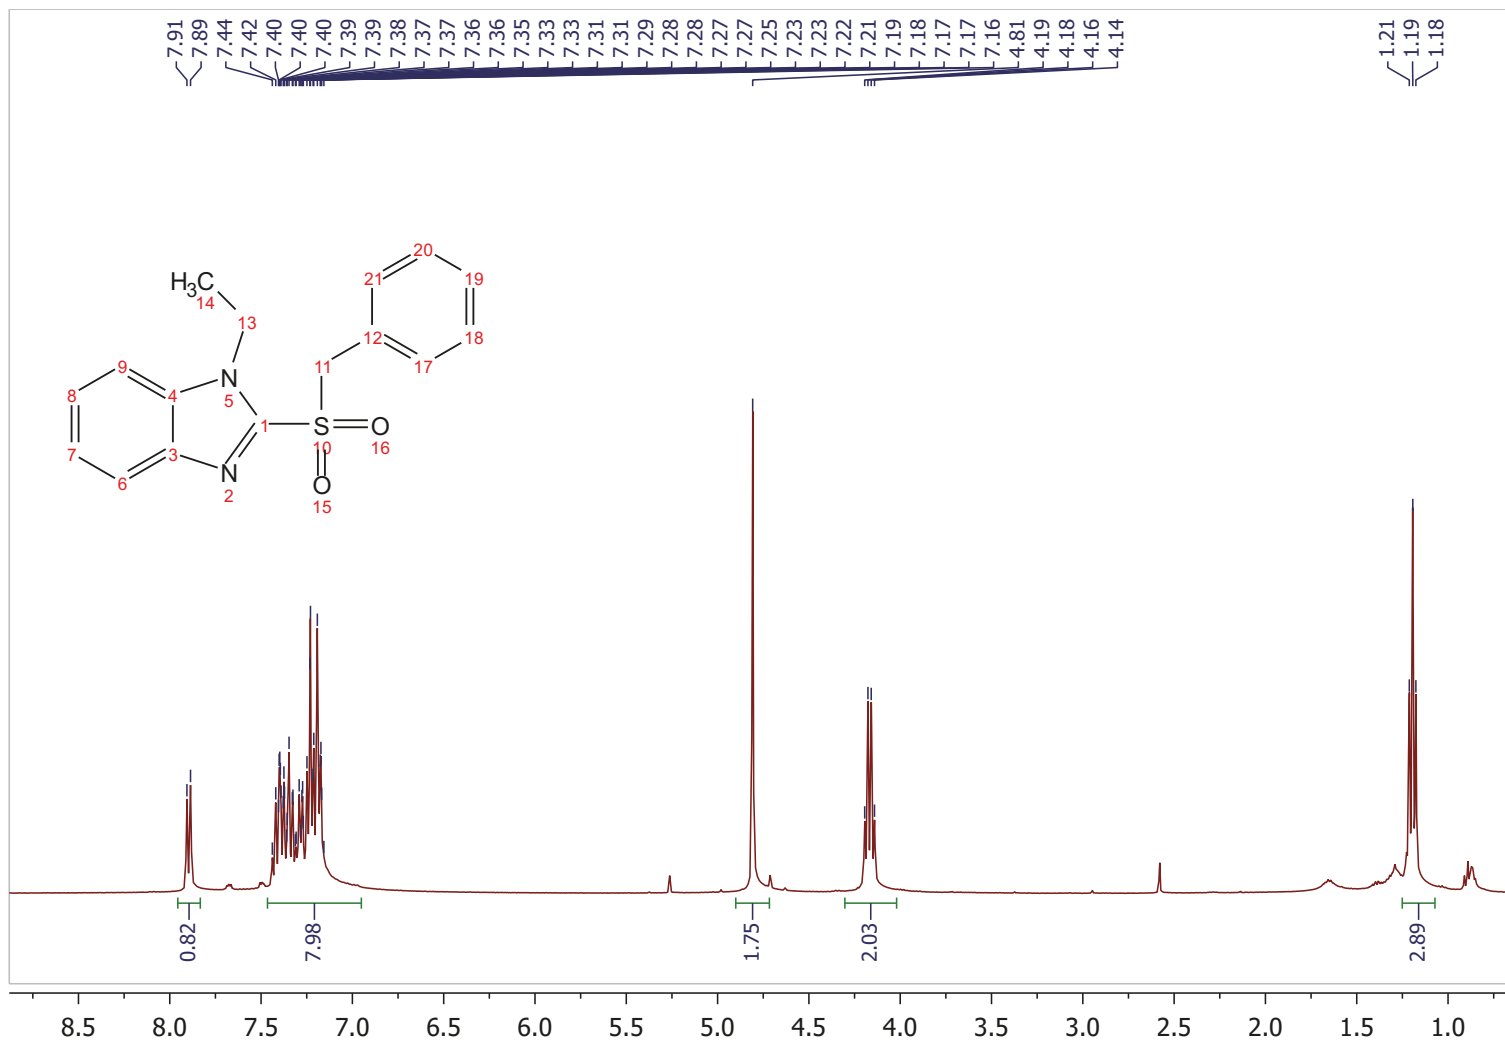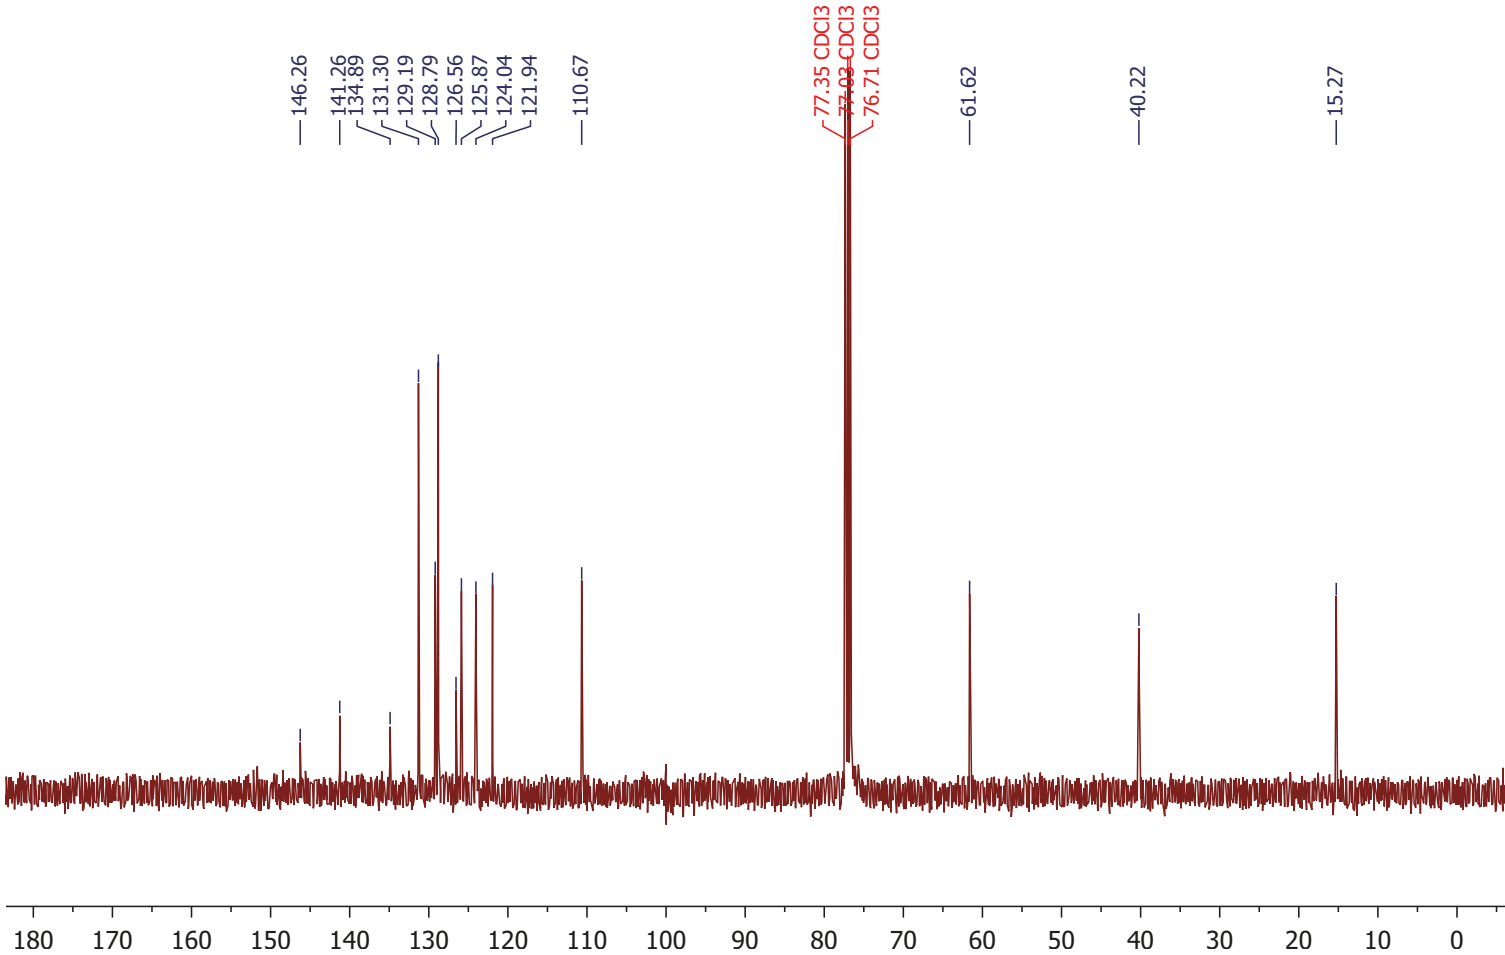

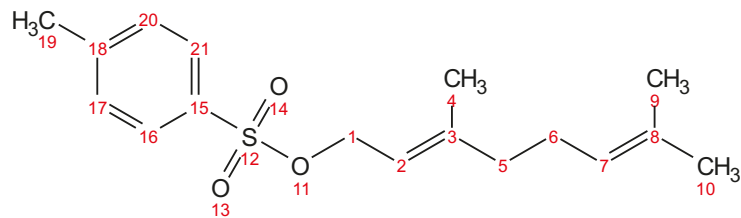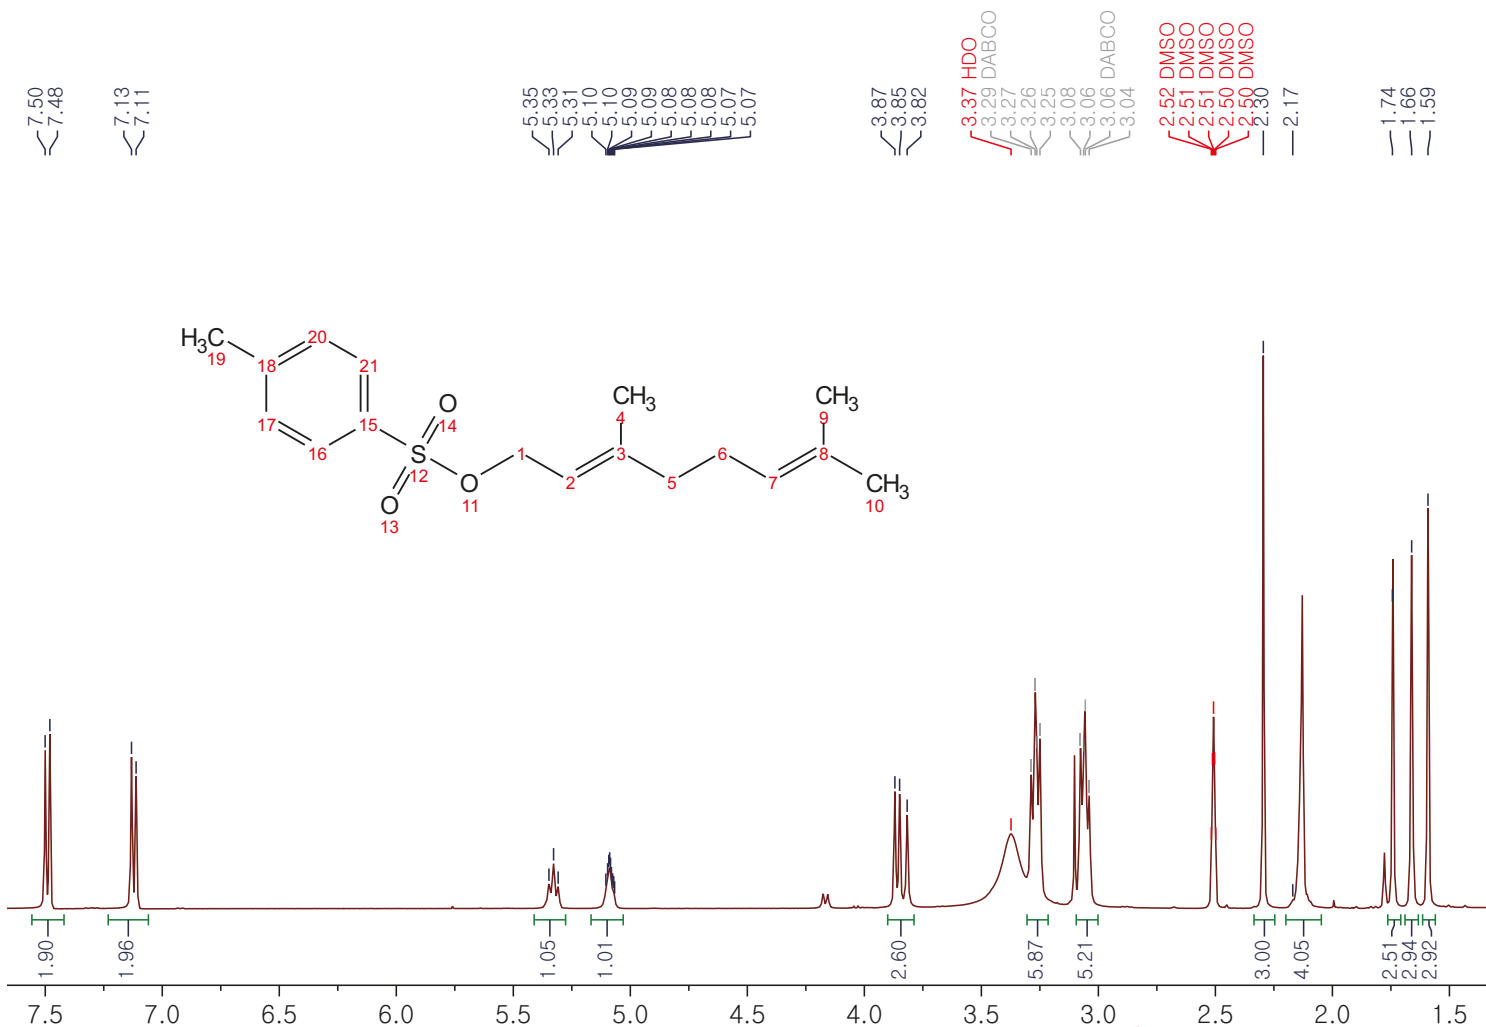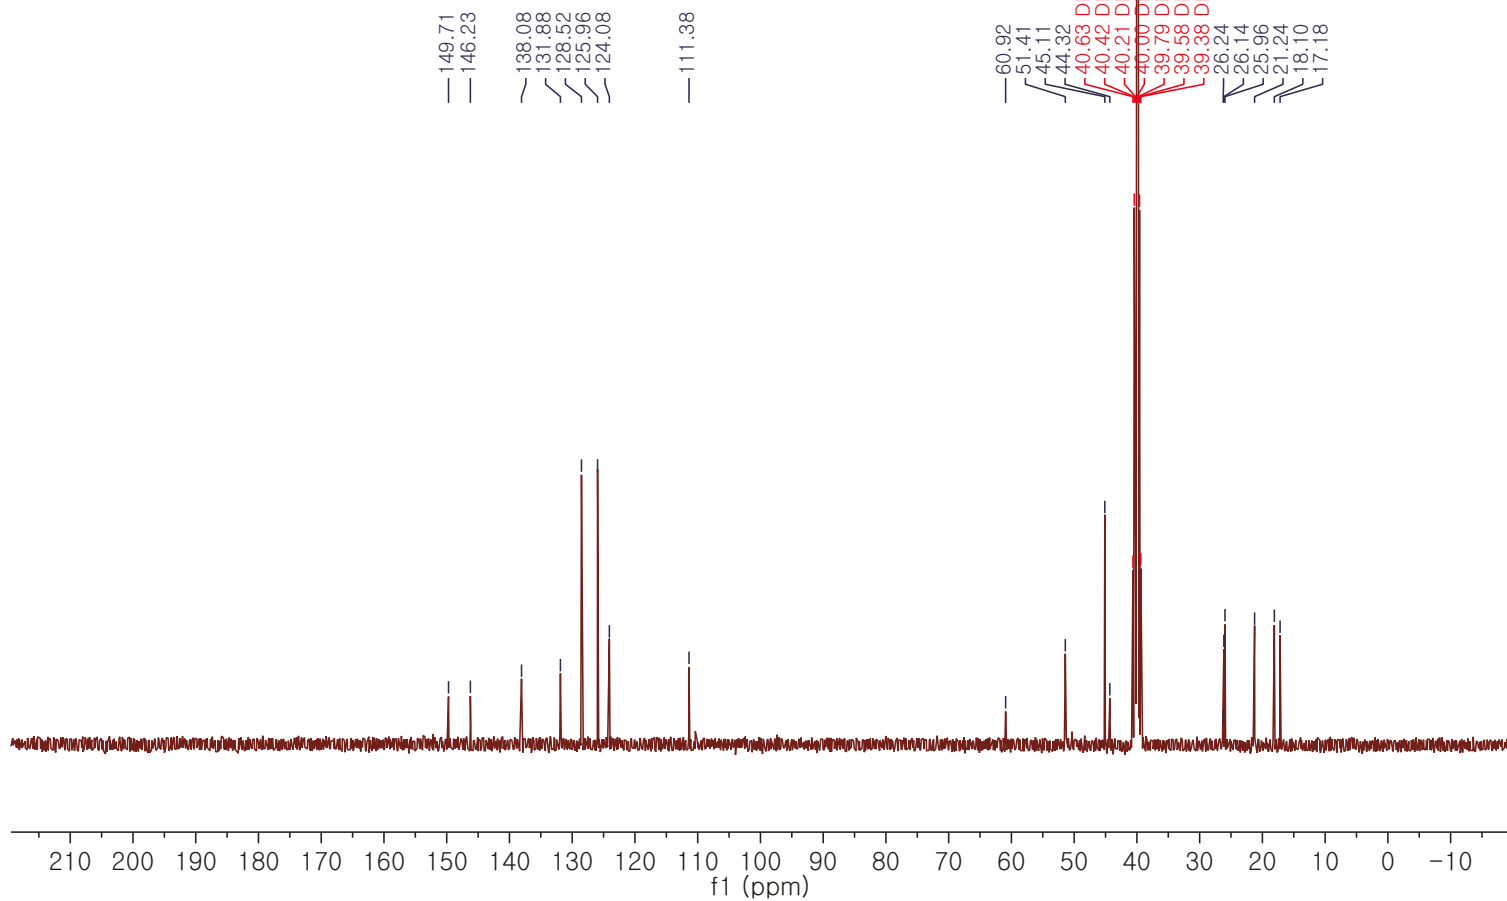

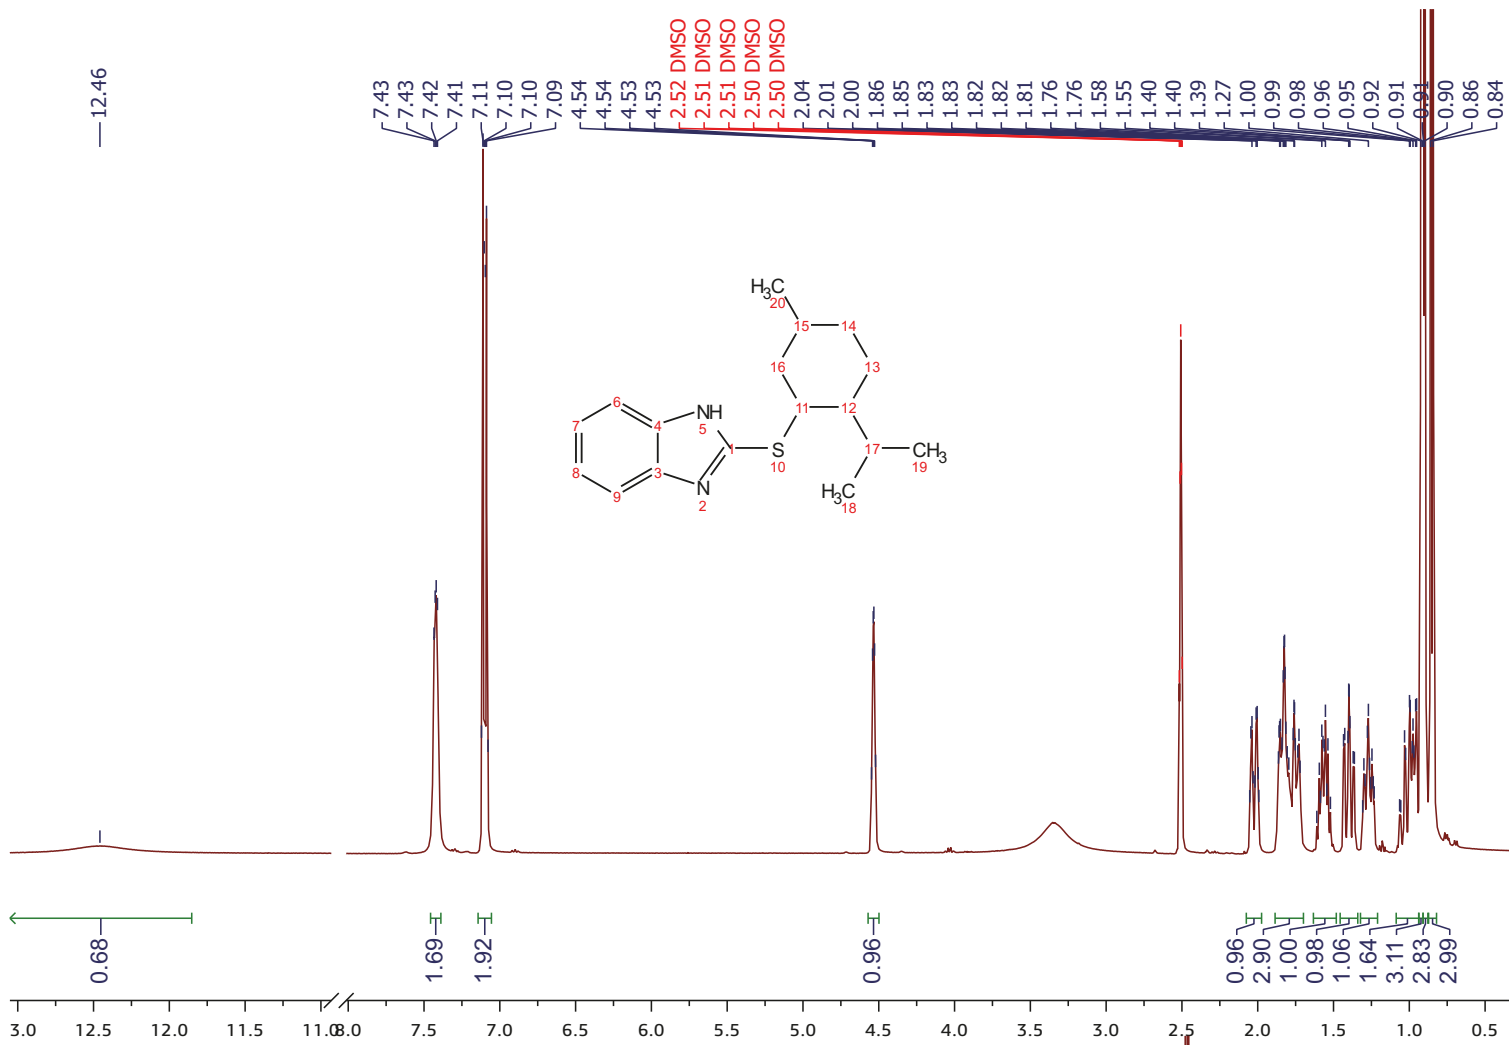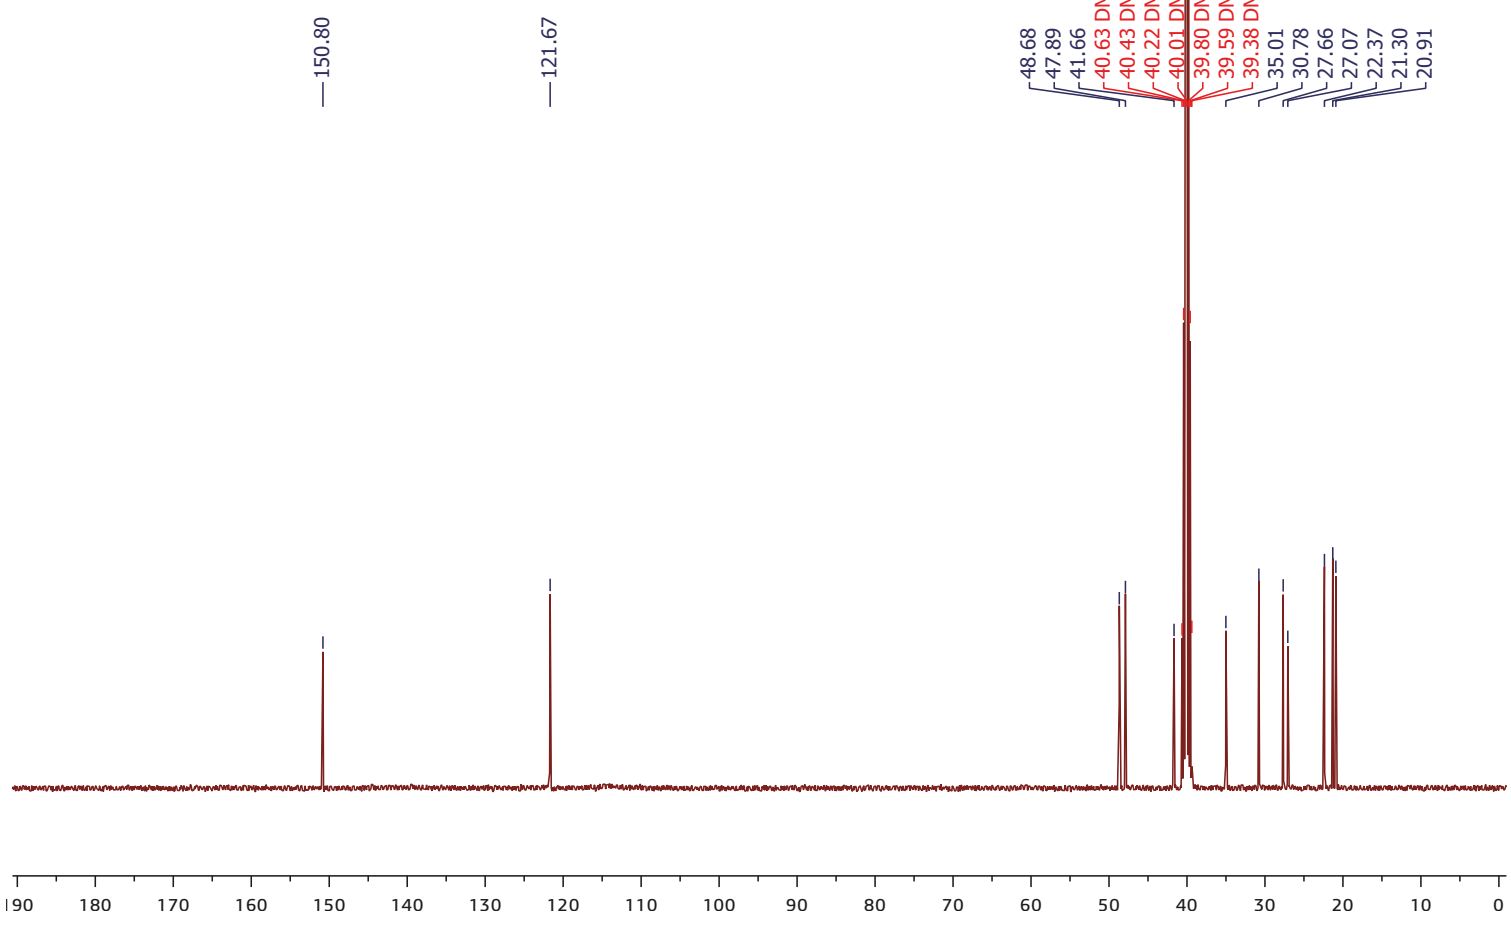

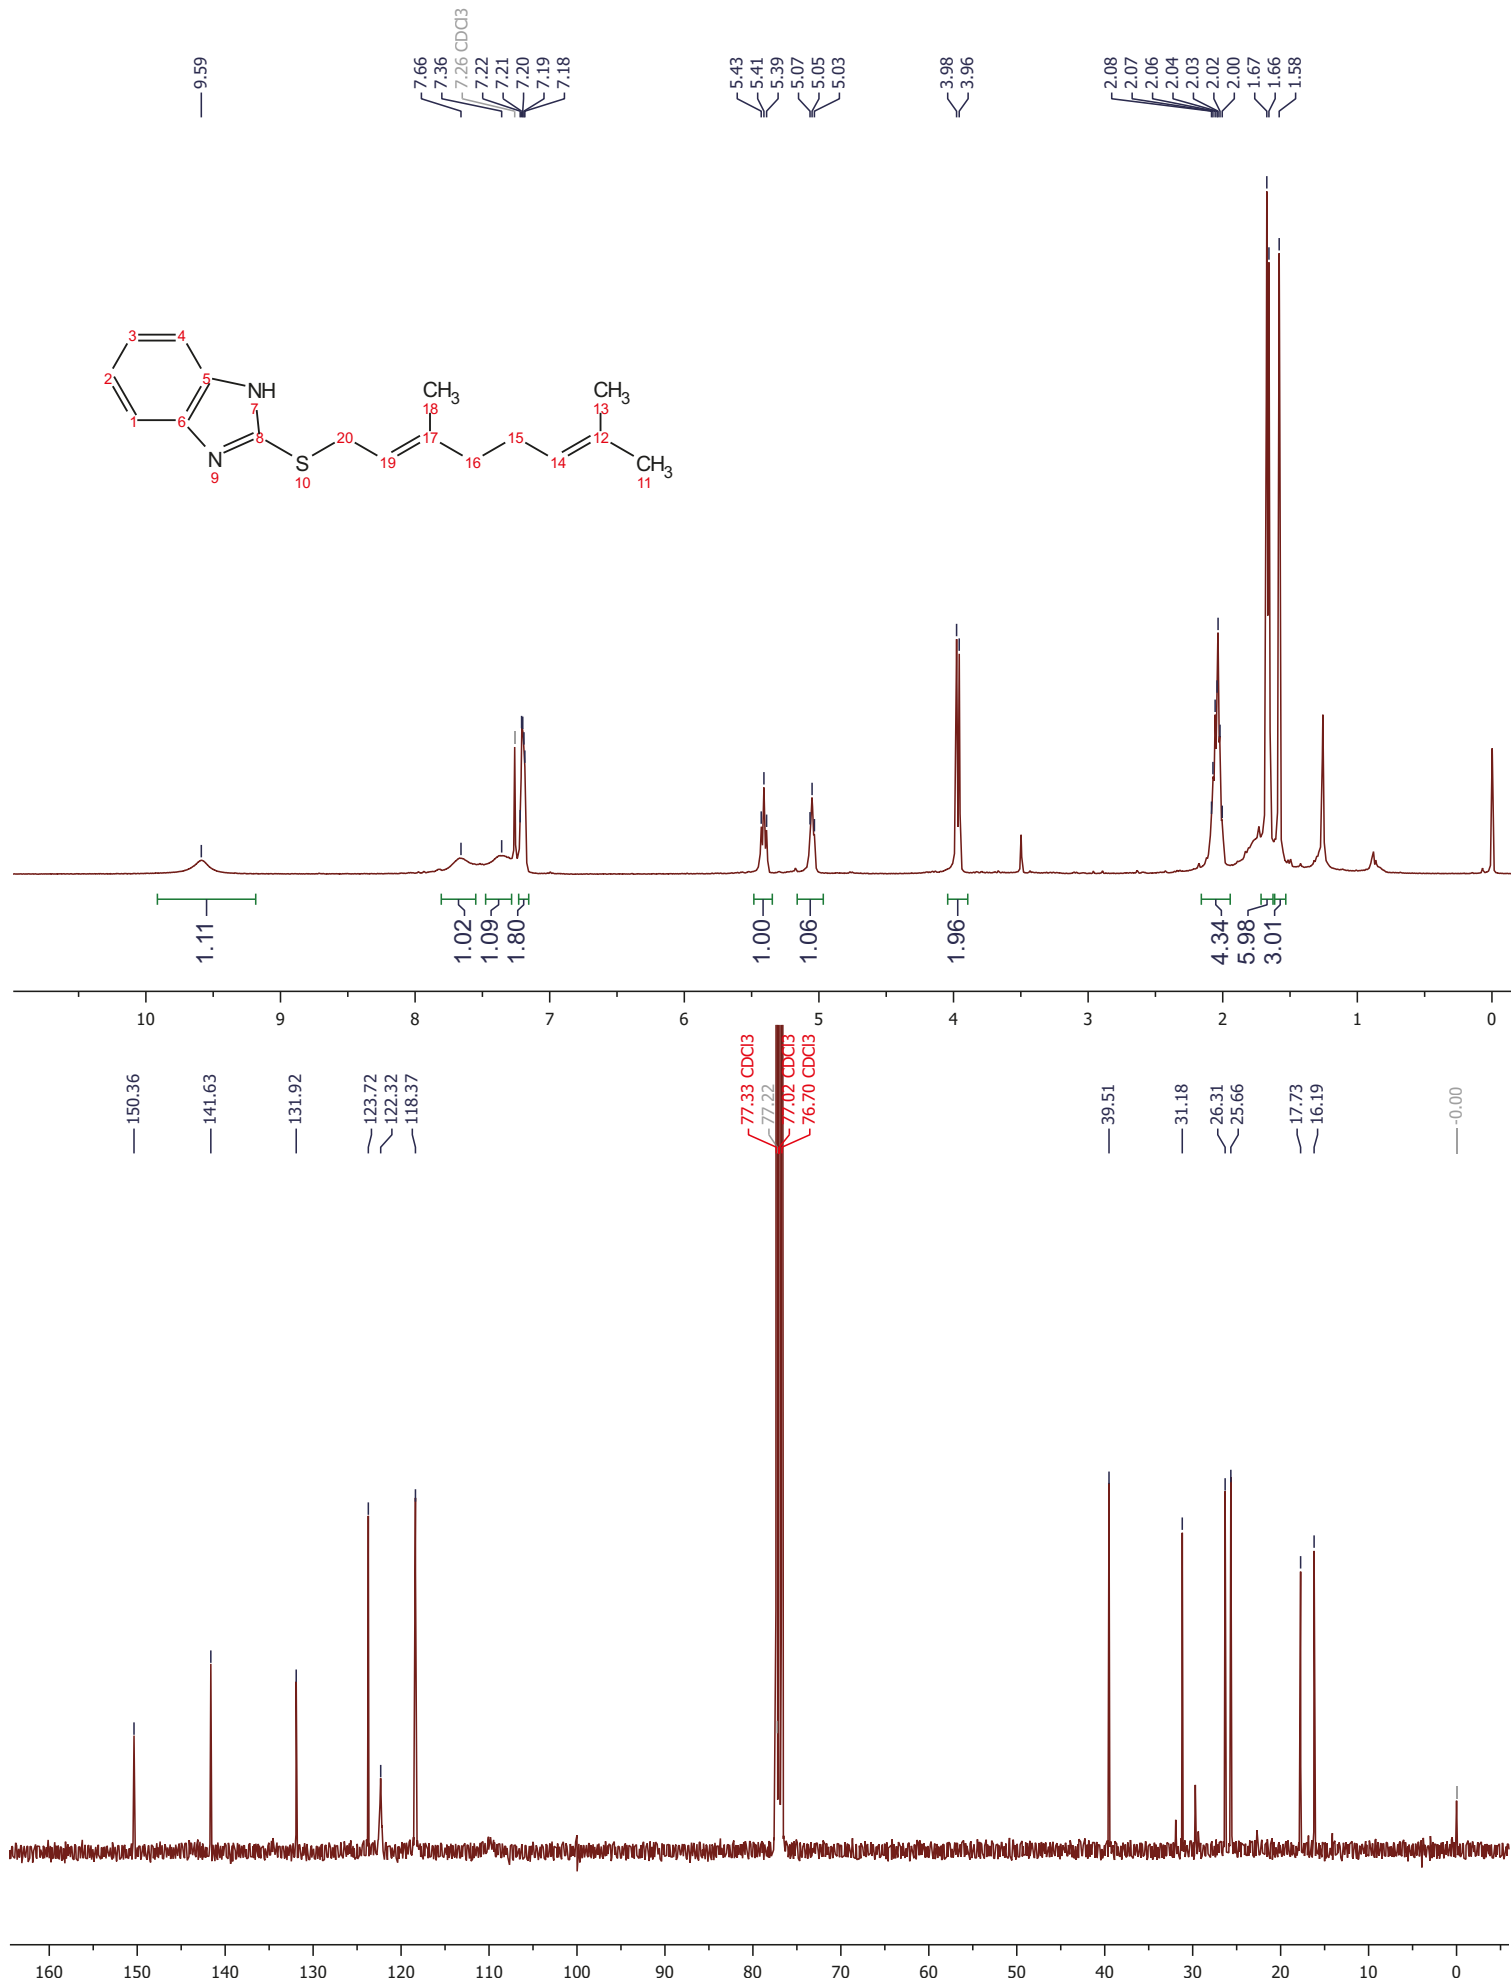

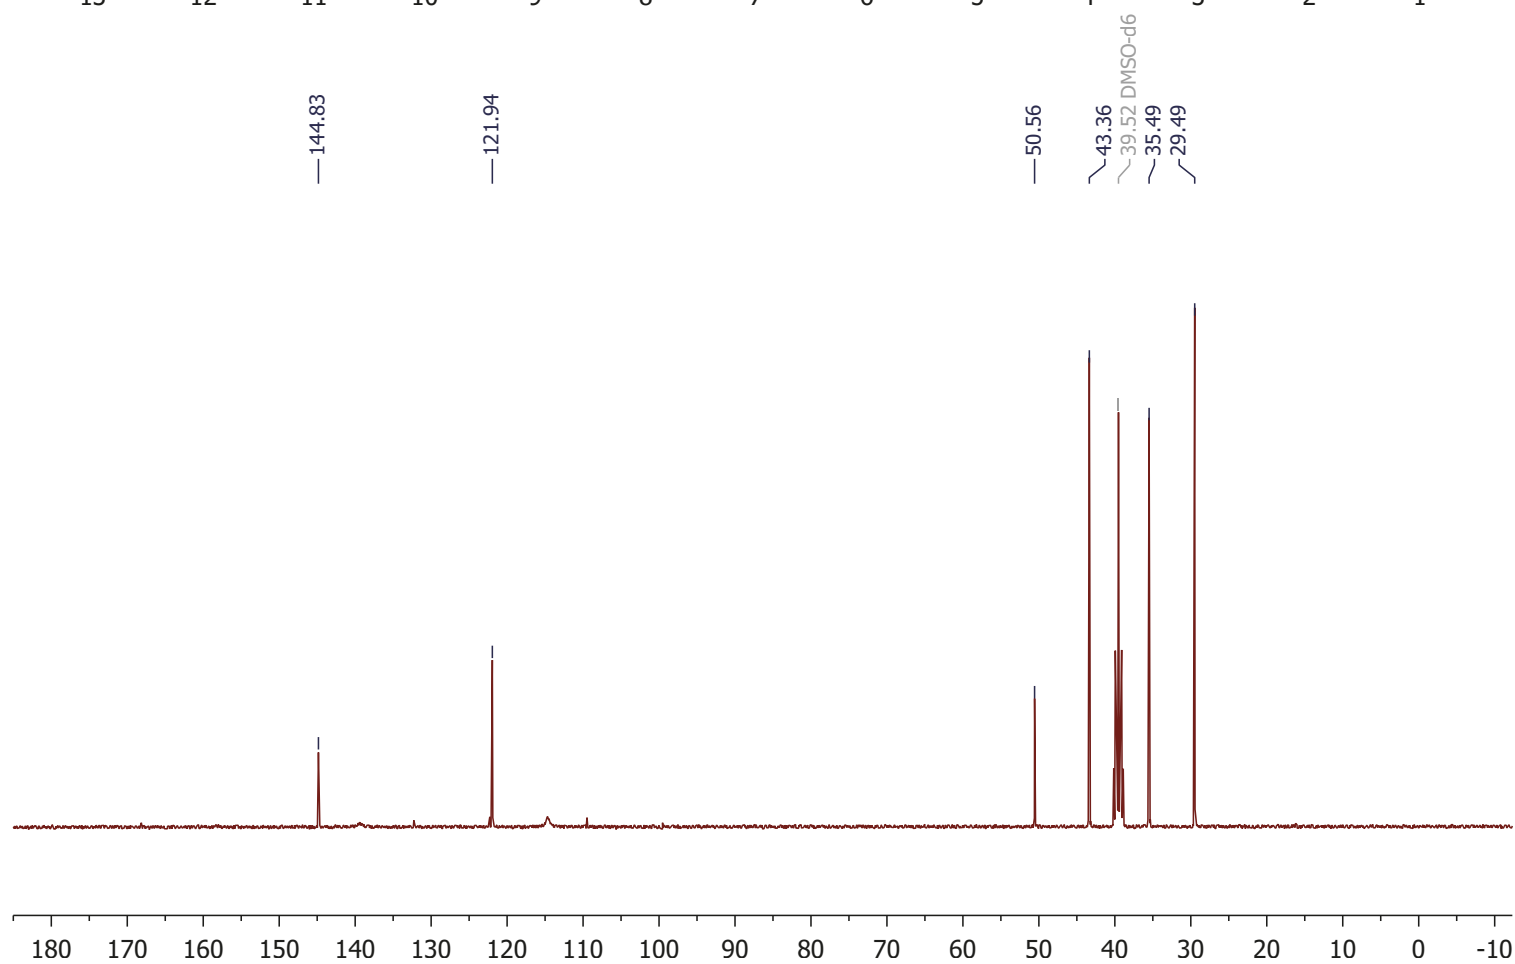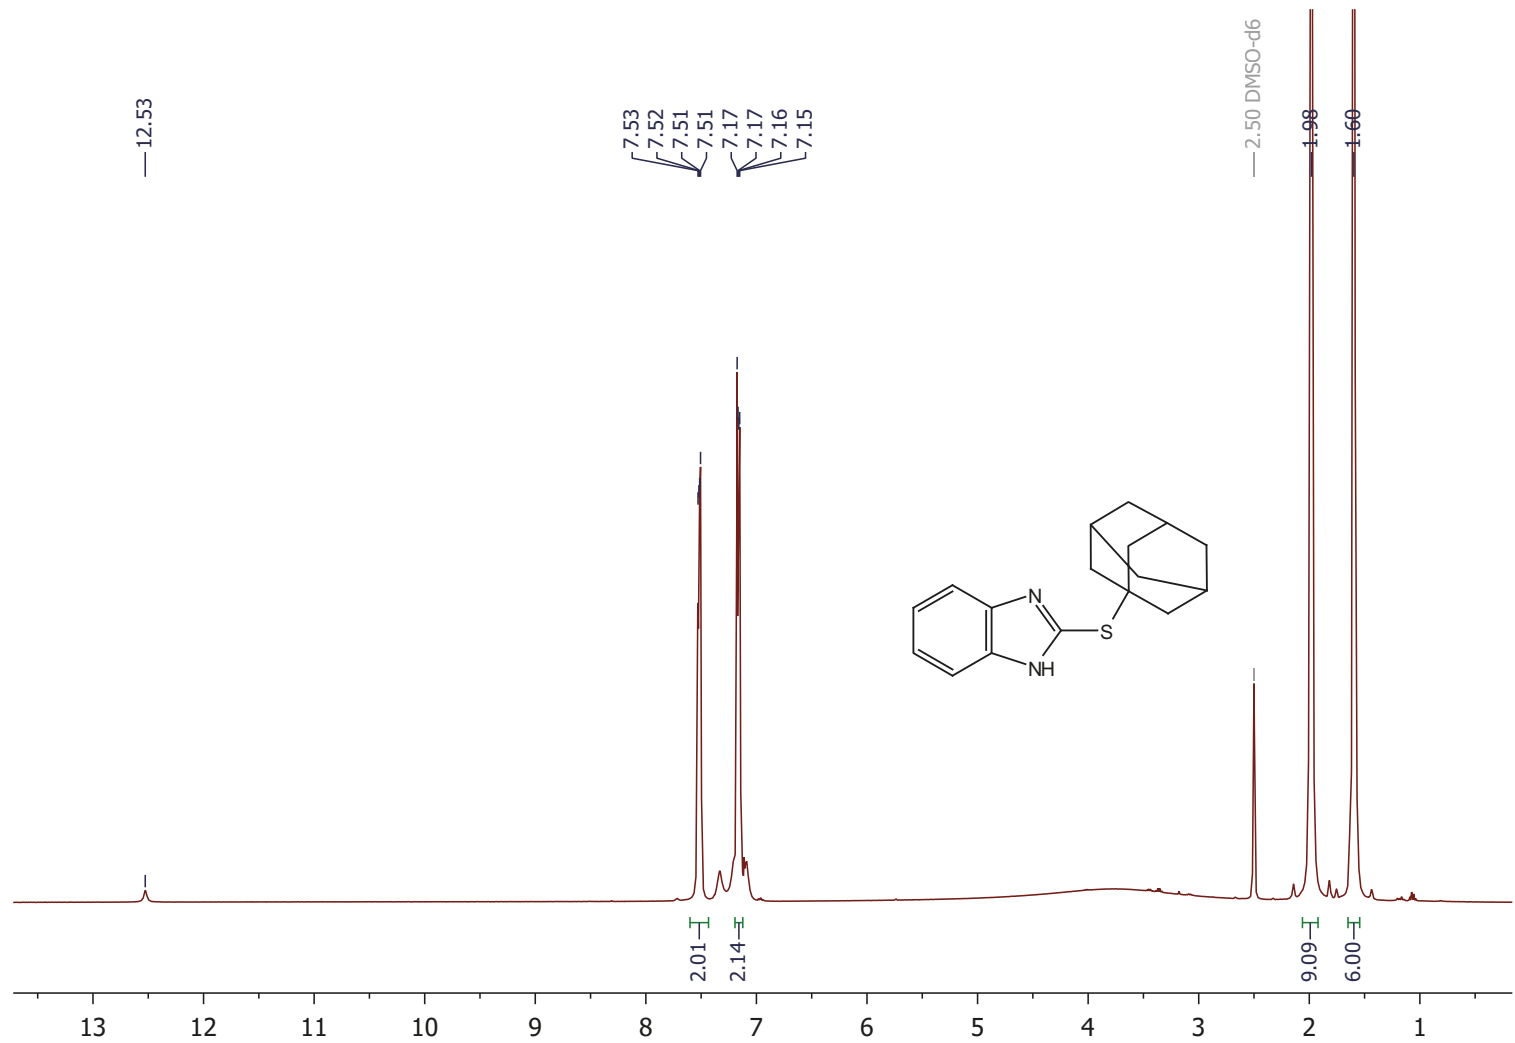

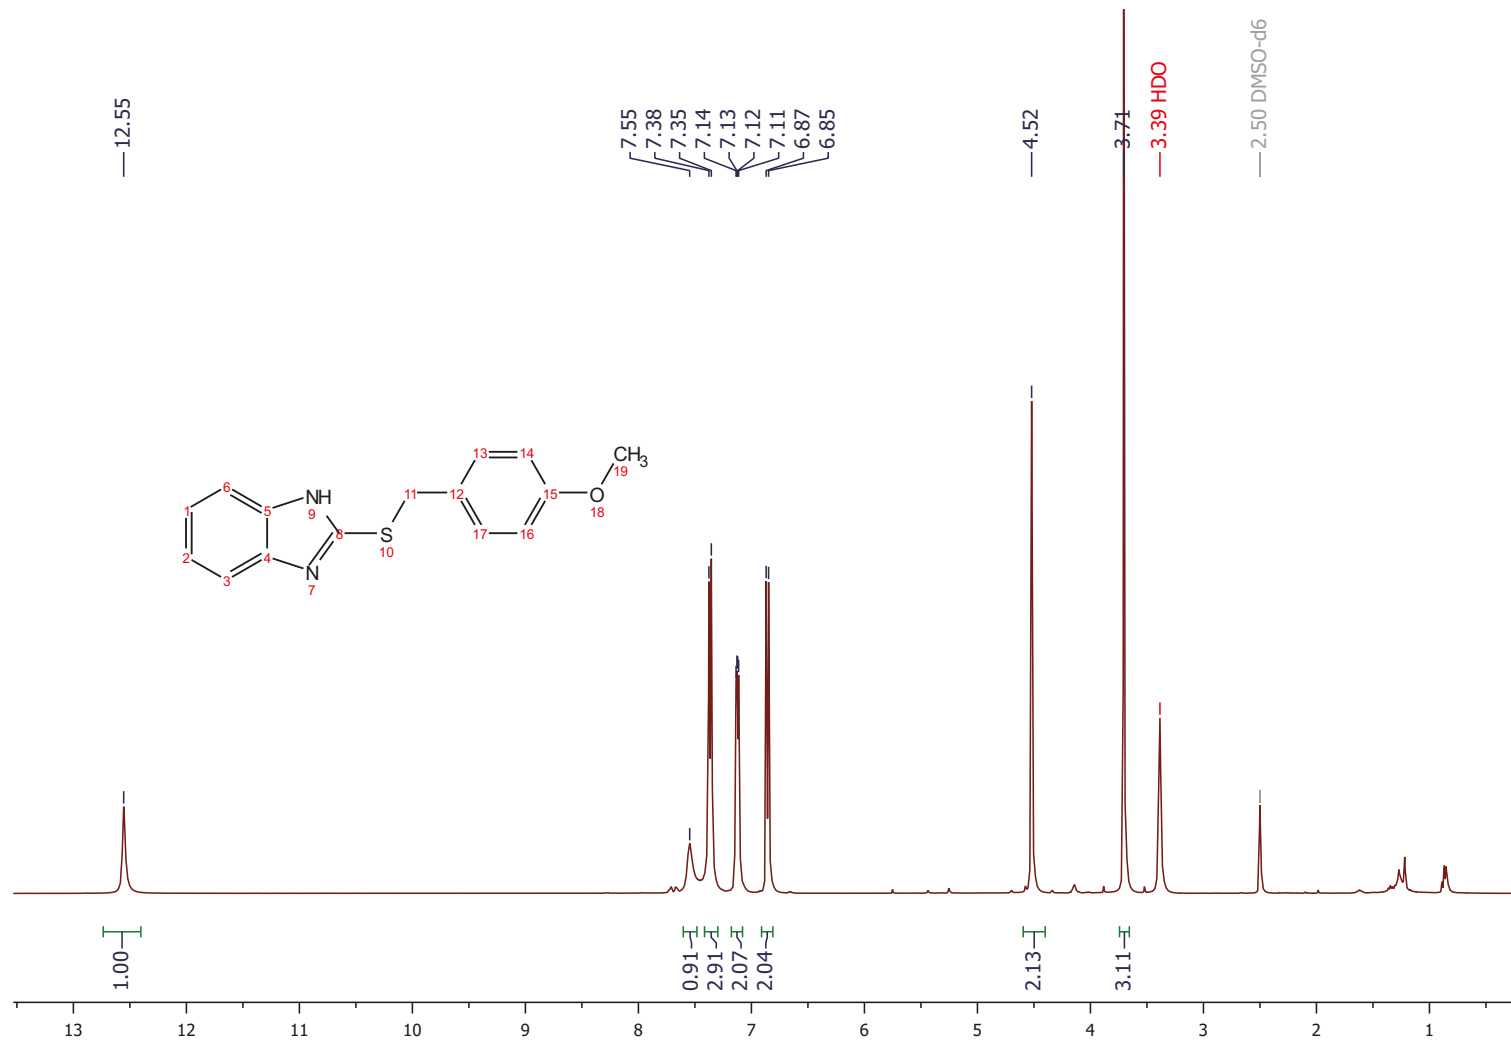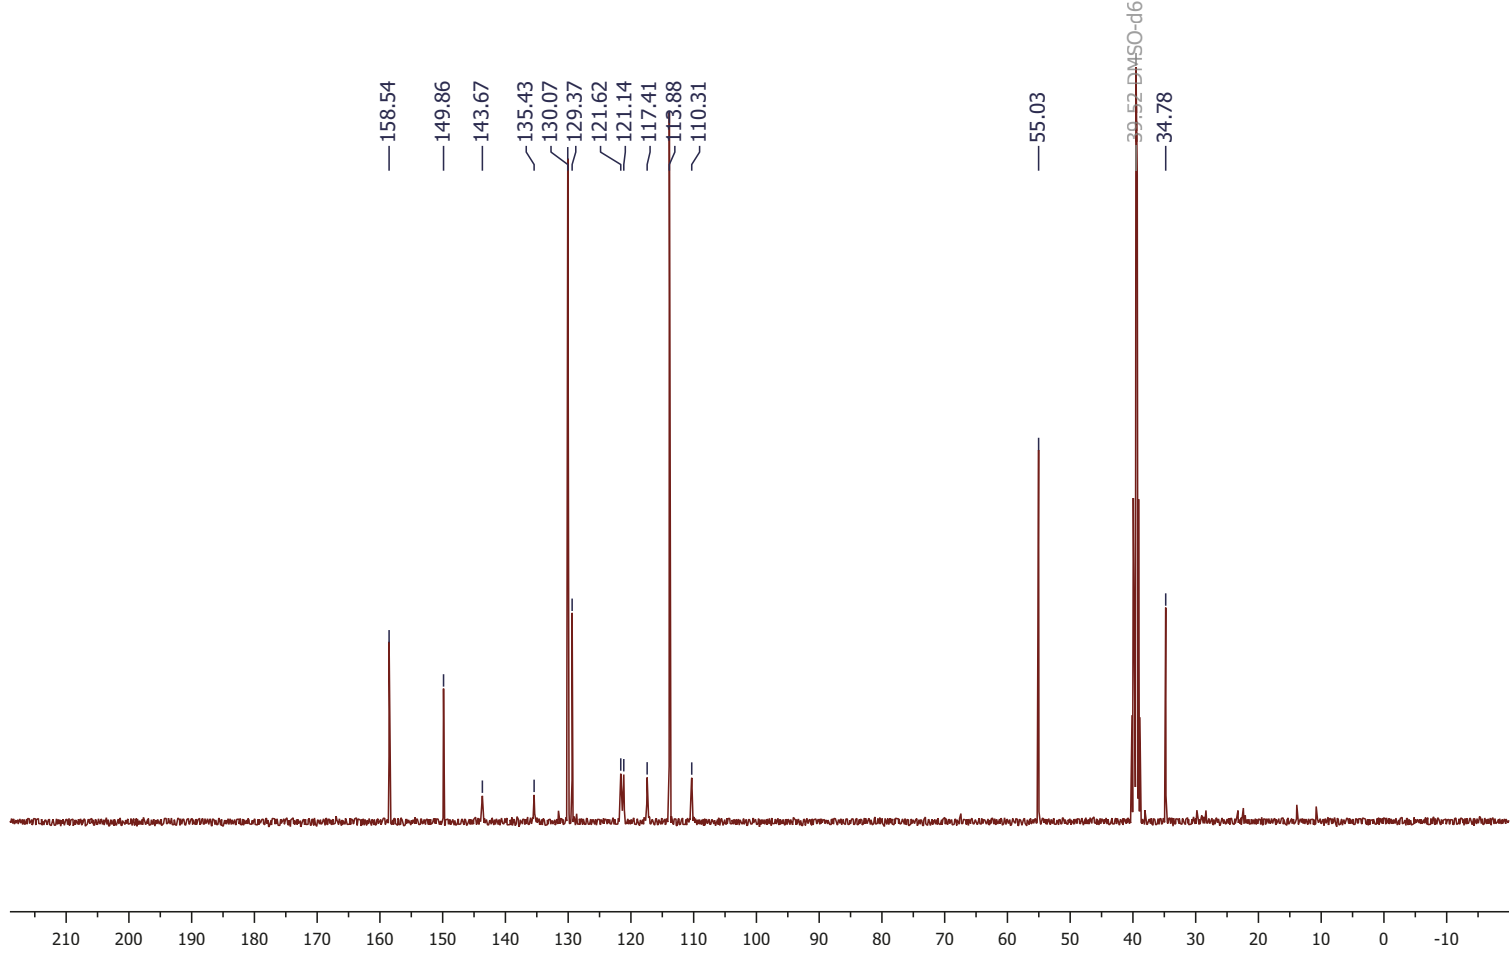

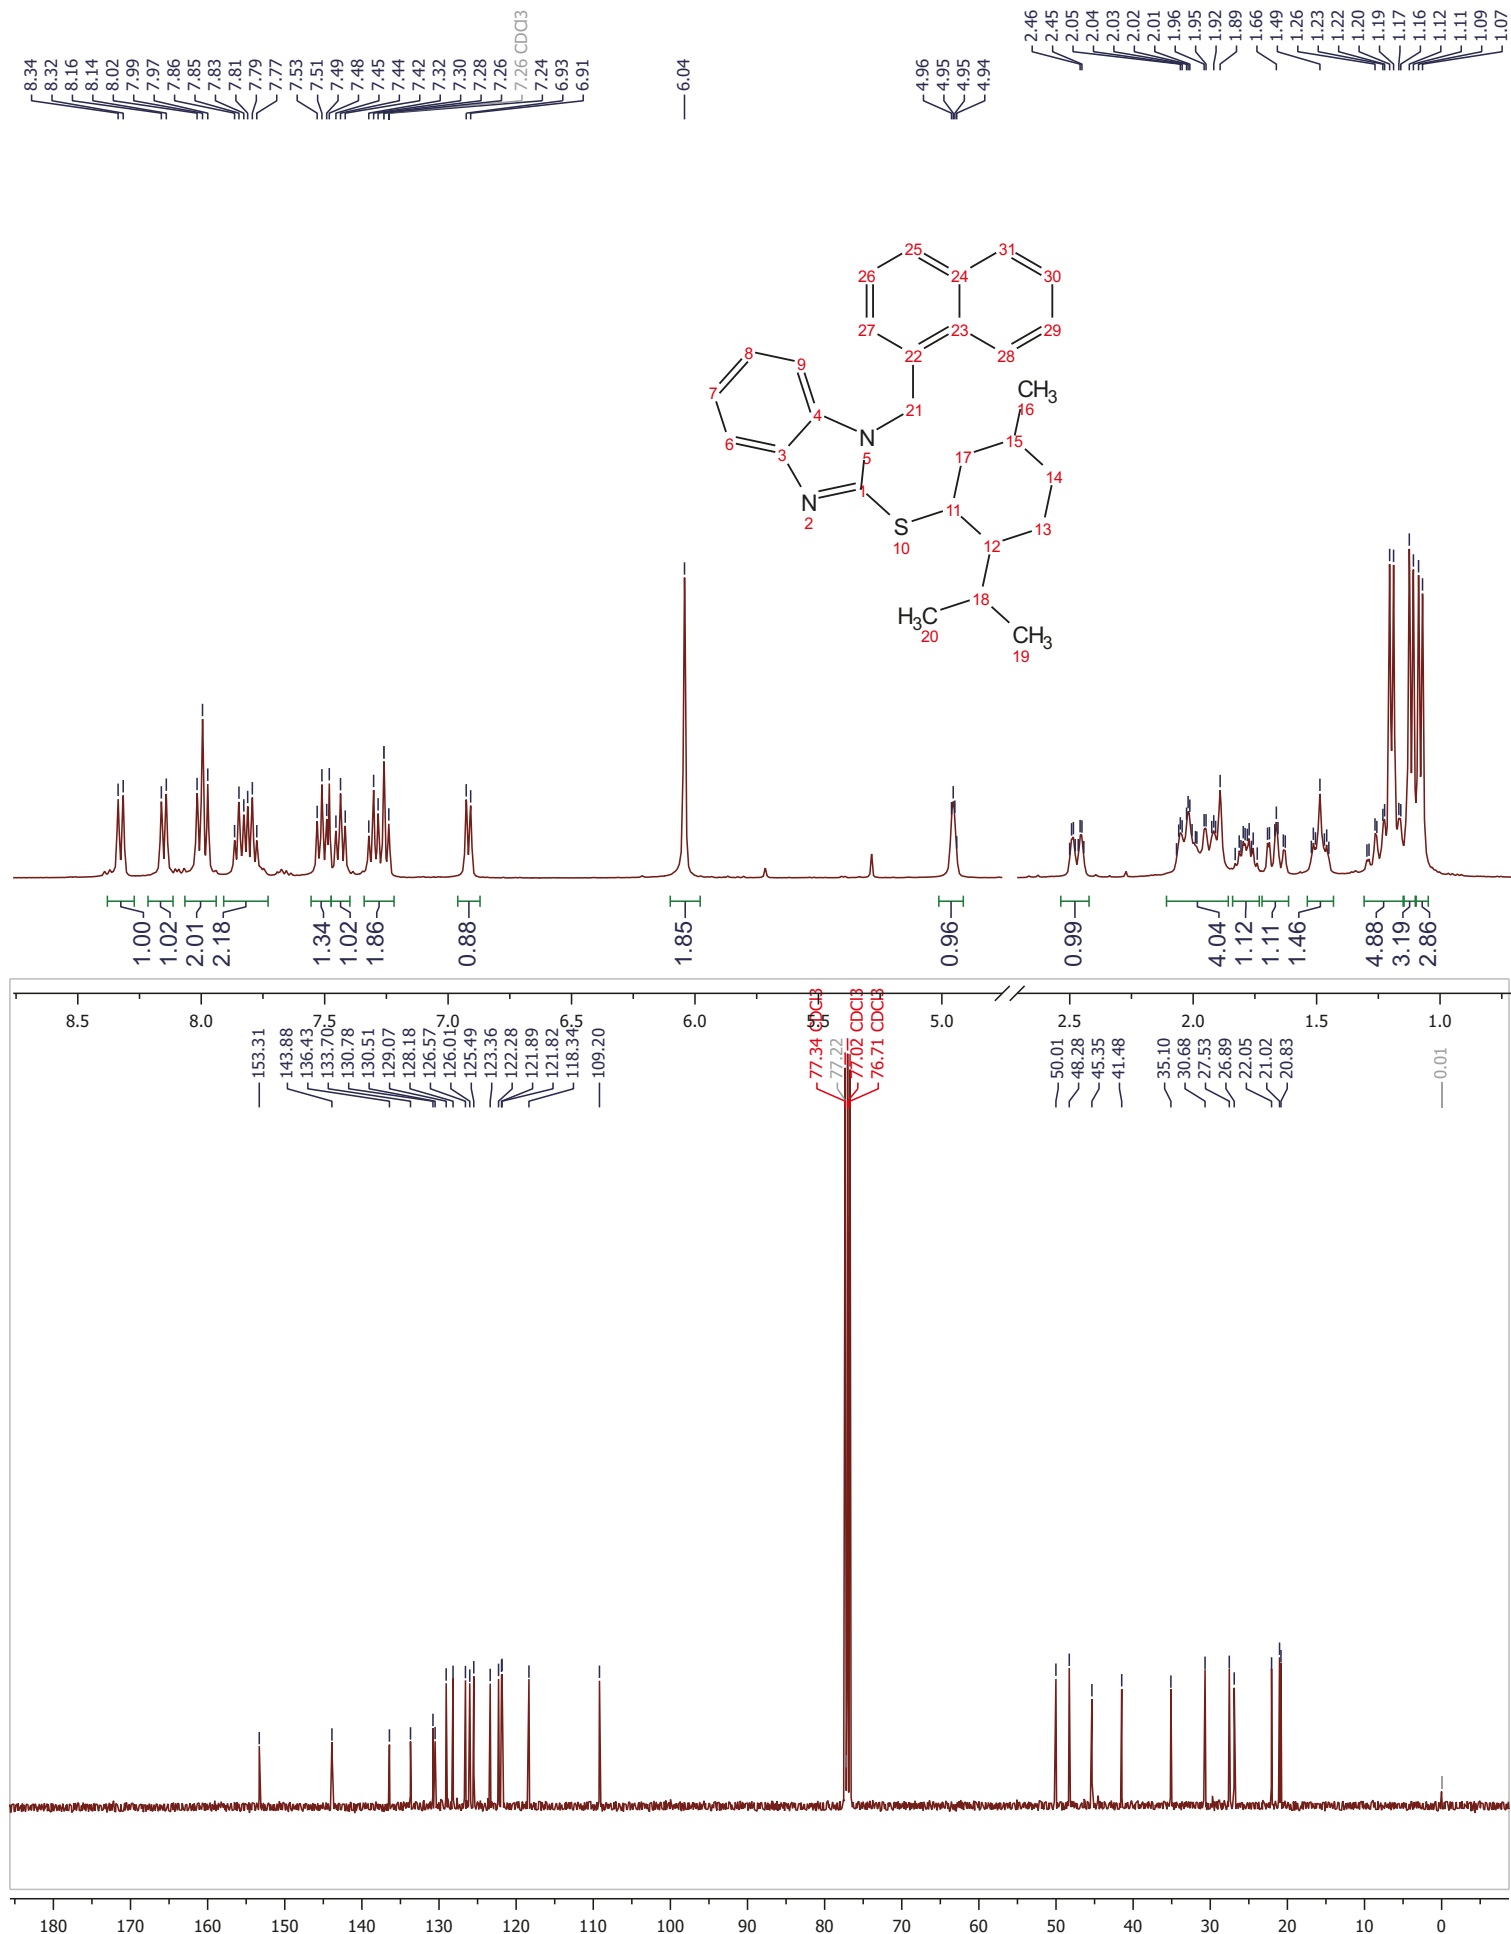



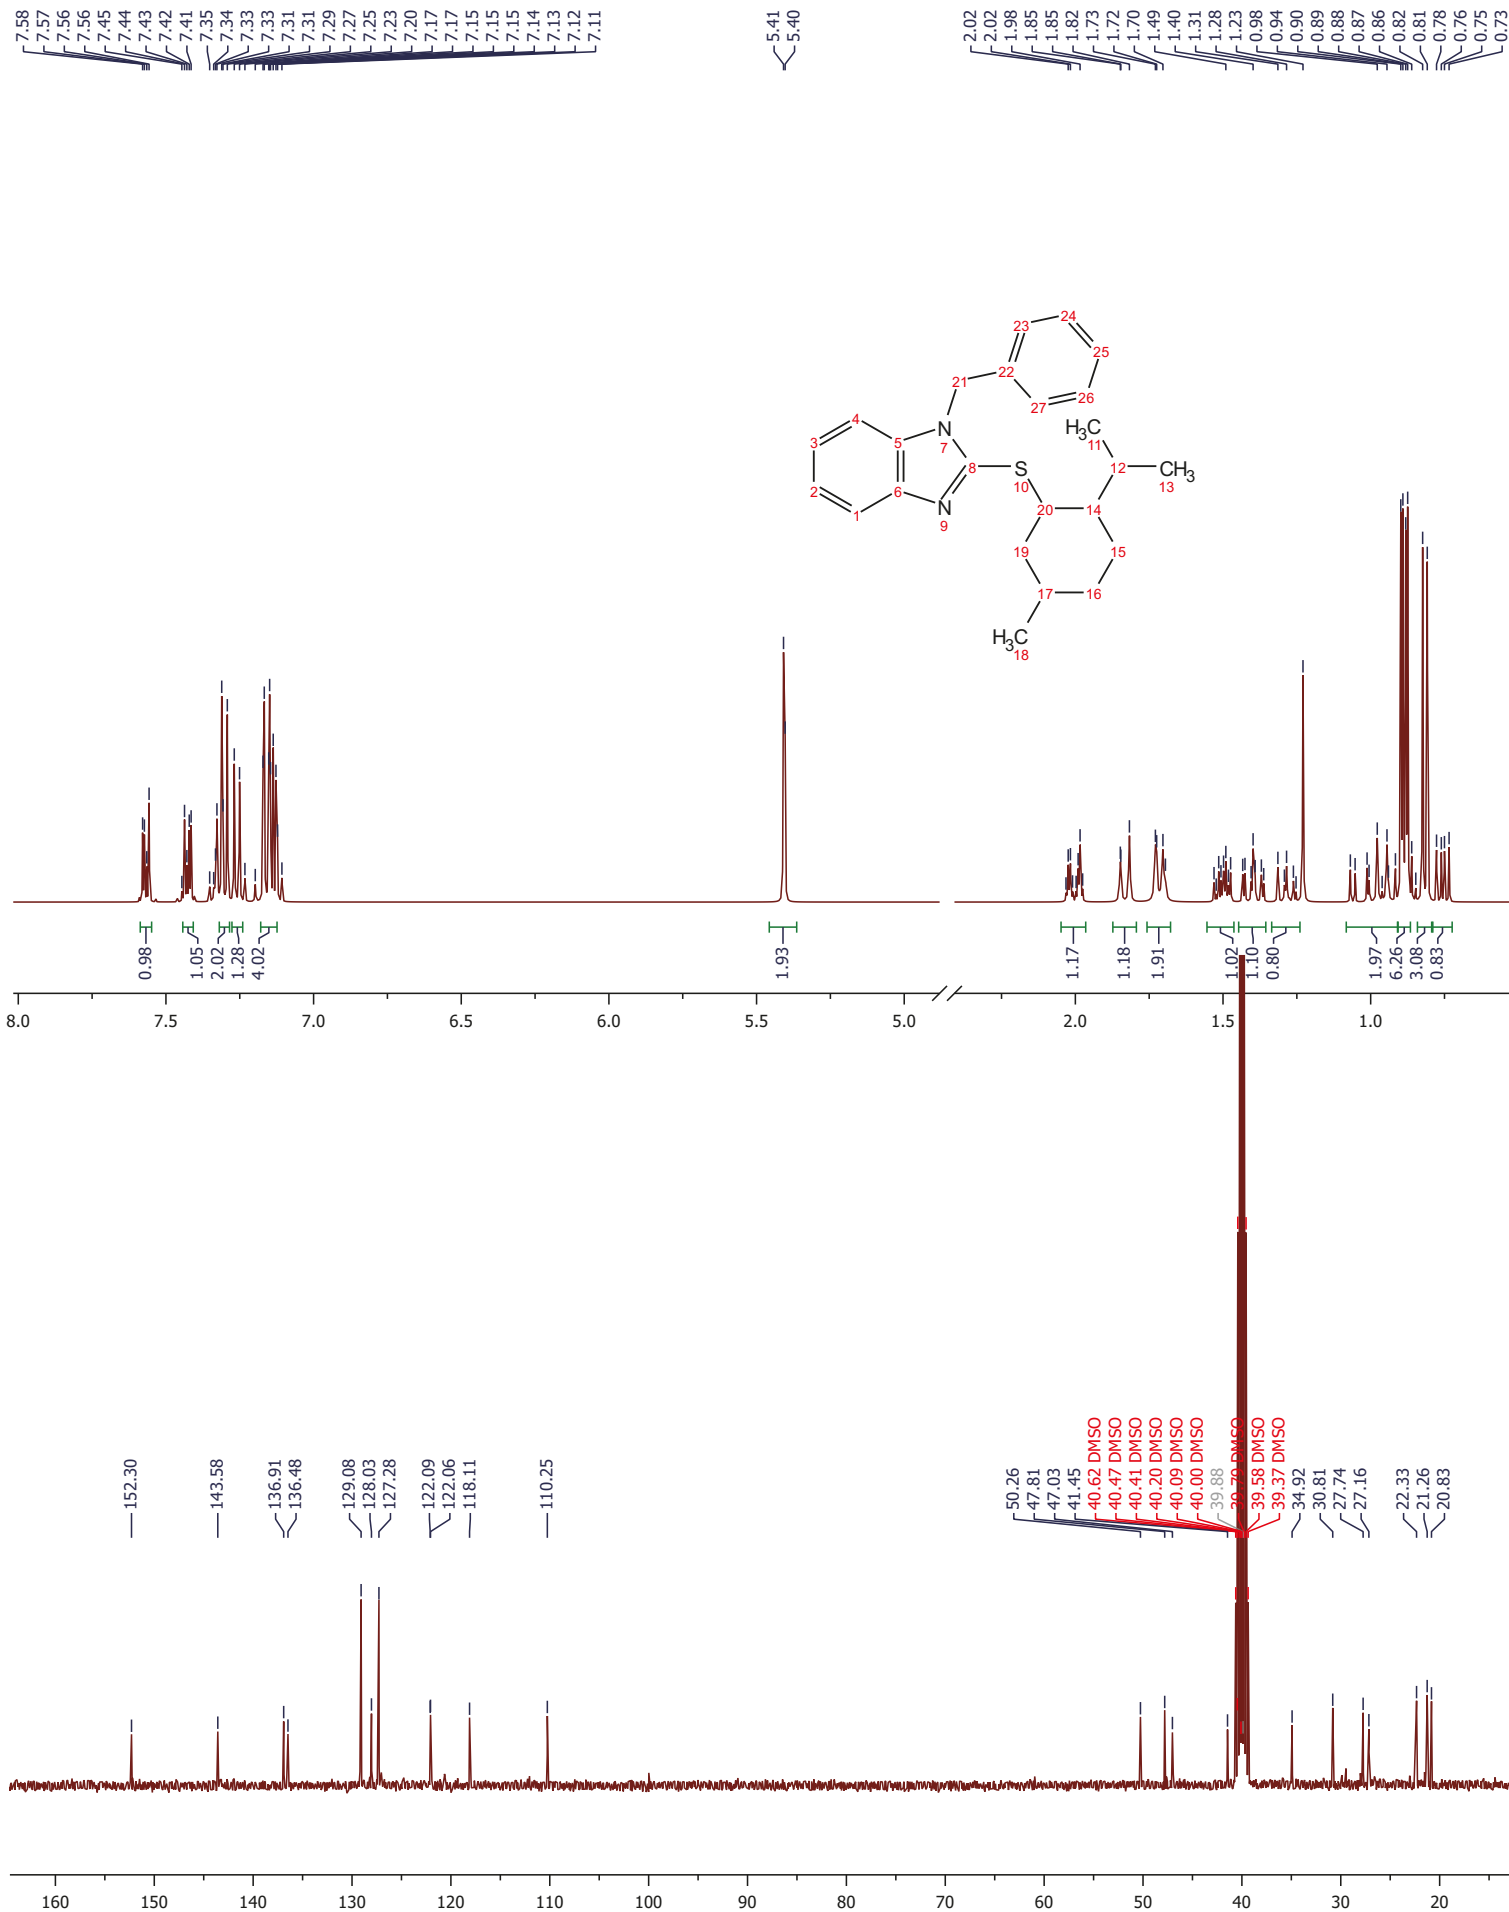

7.73 7.72 7.71 7.29 7.28 7.27 7.26 7.25 7.24 7.23 7.22 7.21 7.19 4.72 4.71 4.71 4.64 4.24 4.23 4.21 4.19 4.17 1.96 1.95 1.92 1.91 1.47 1.47 1.46 1.44 1.42 1.40 1.32 1.31 1.30 1.28 1.03 1.02 1.00 0.99 0.97 0.96 0.94 0.93 0.91 0.90

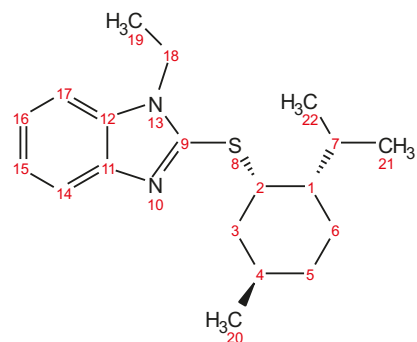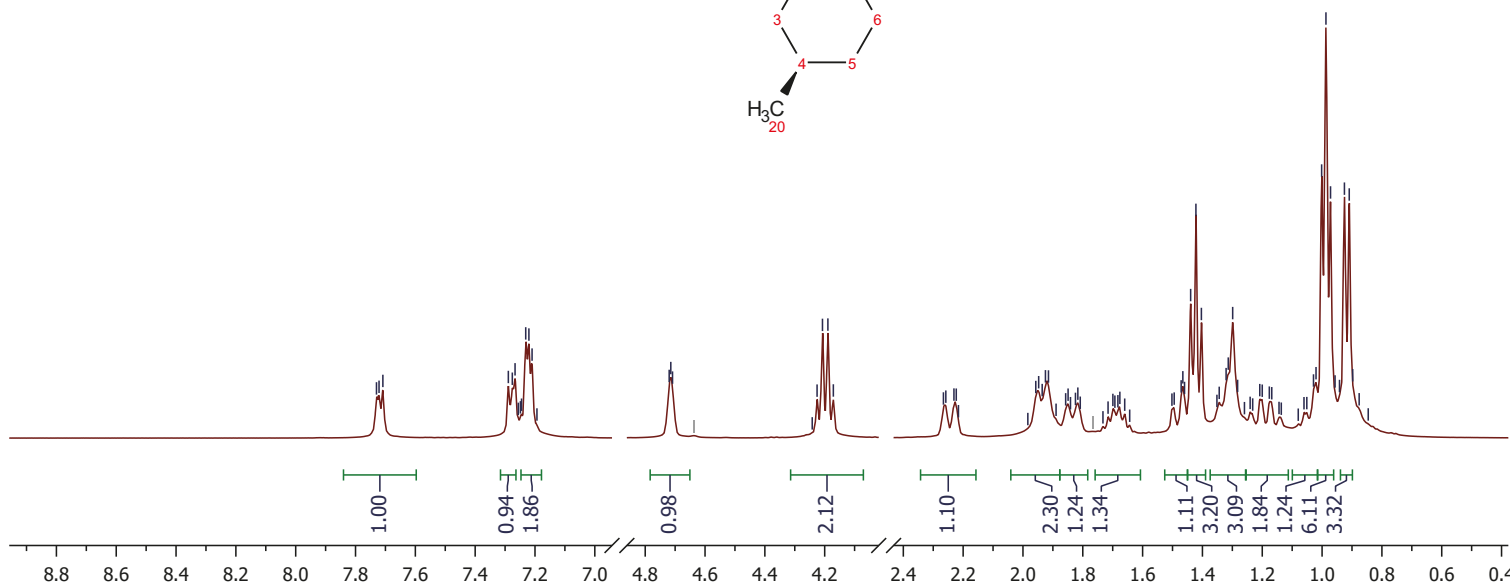

152.11 143.91 135.81 121.59 121.54 118.33 108.46 77.16 CDCl3 49.56 48.43 41.63 38.85 35.32 30.88 27.77 27.16 22.18 21.18 20.96 14.67

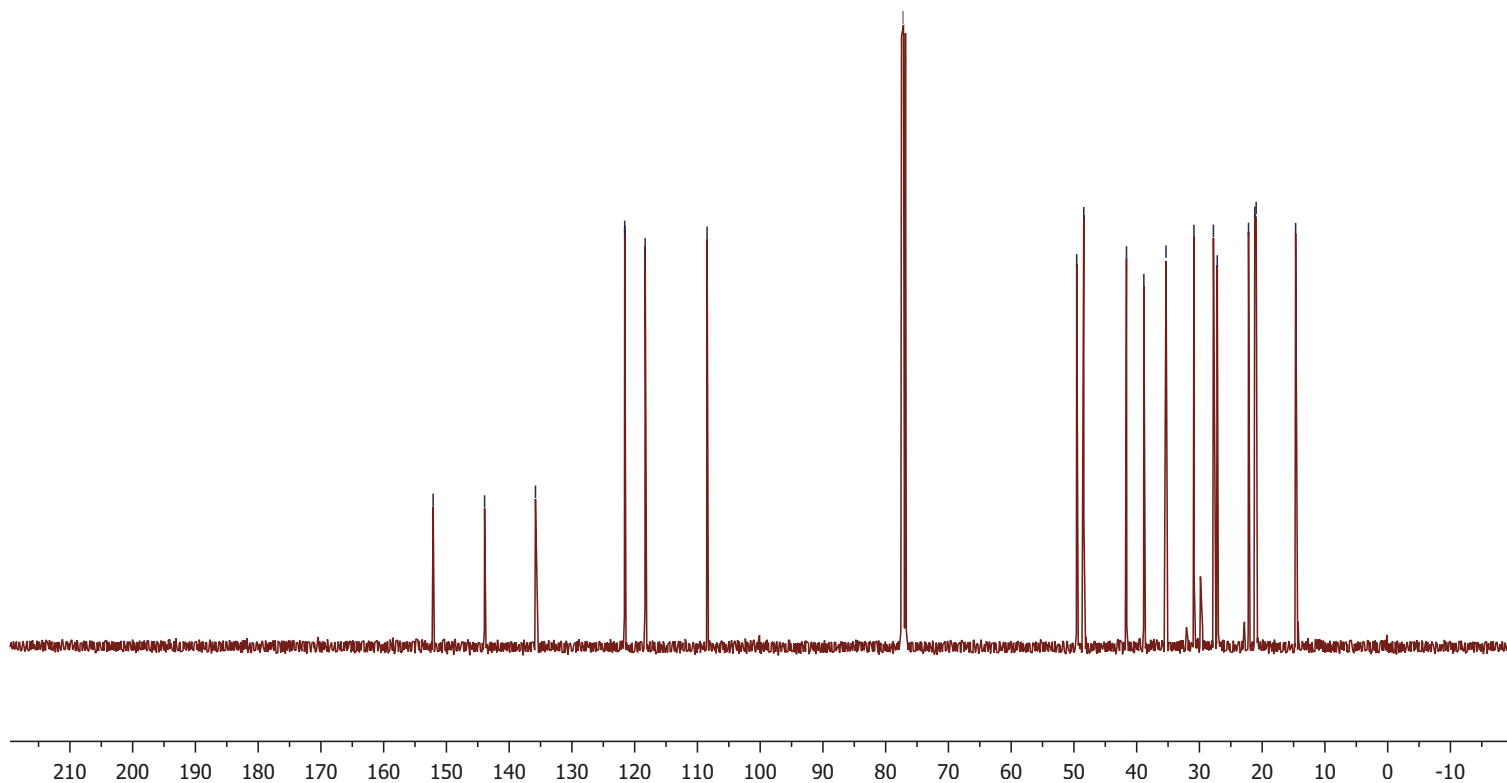

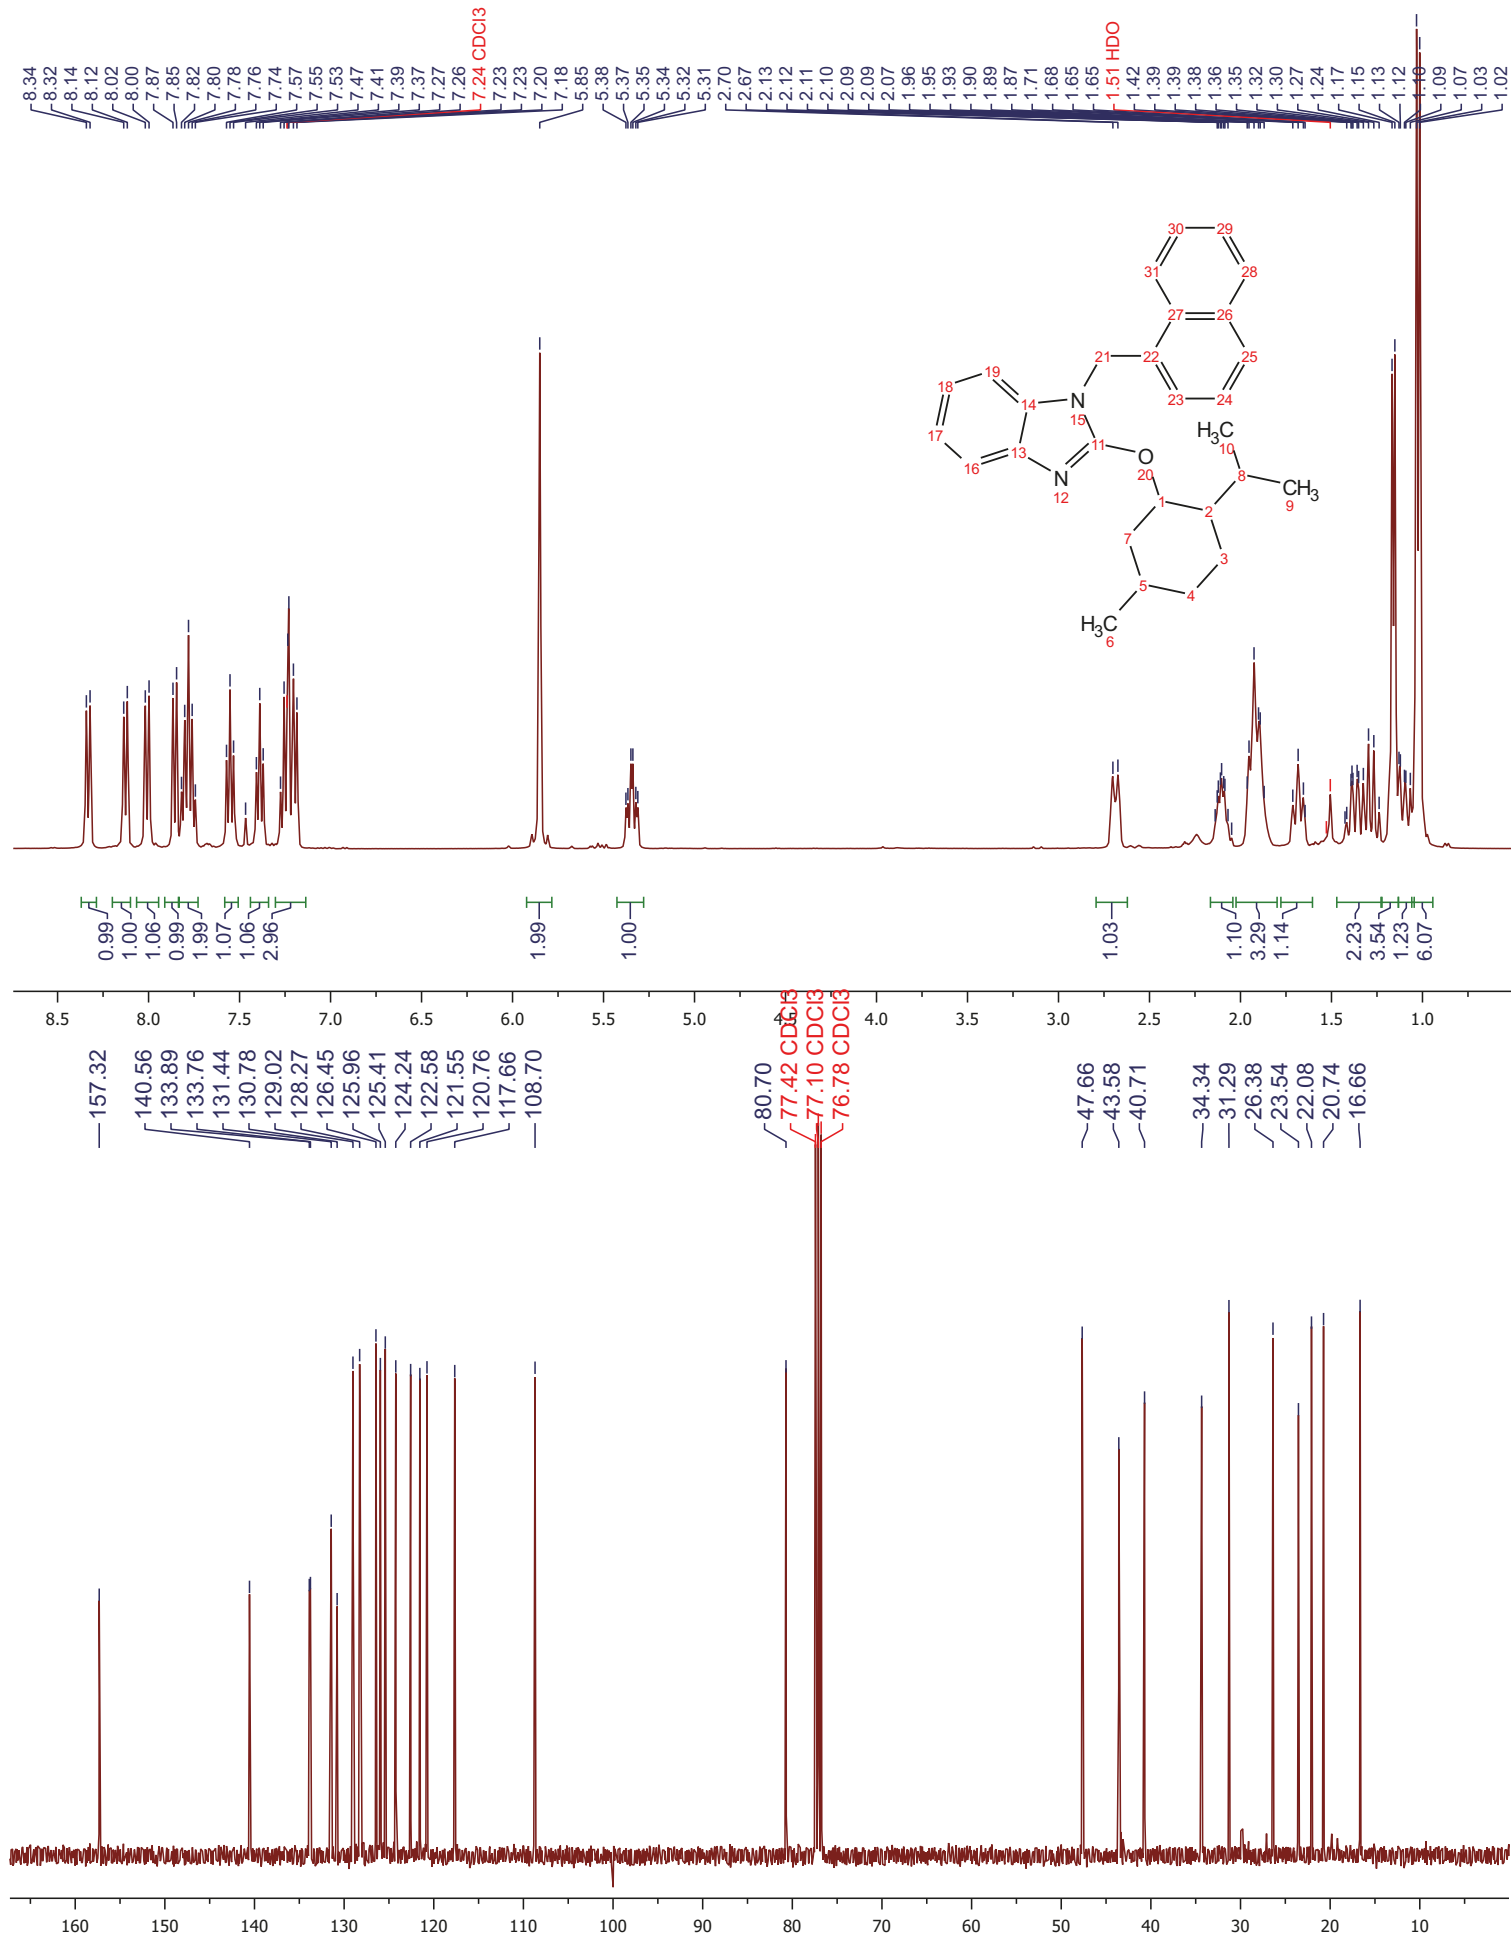

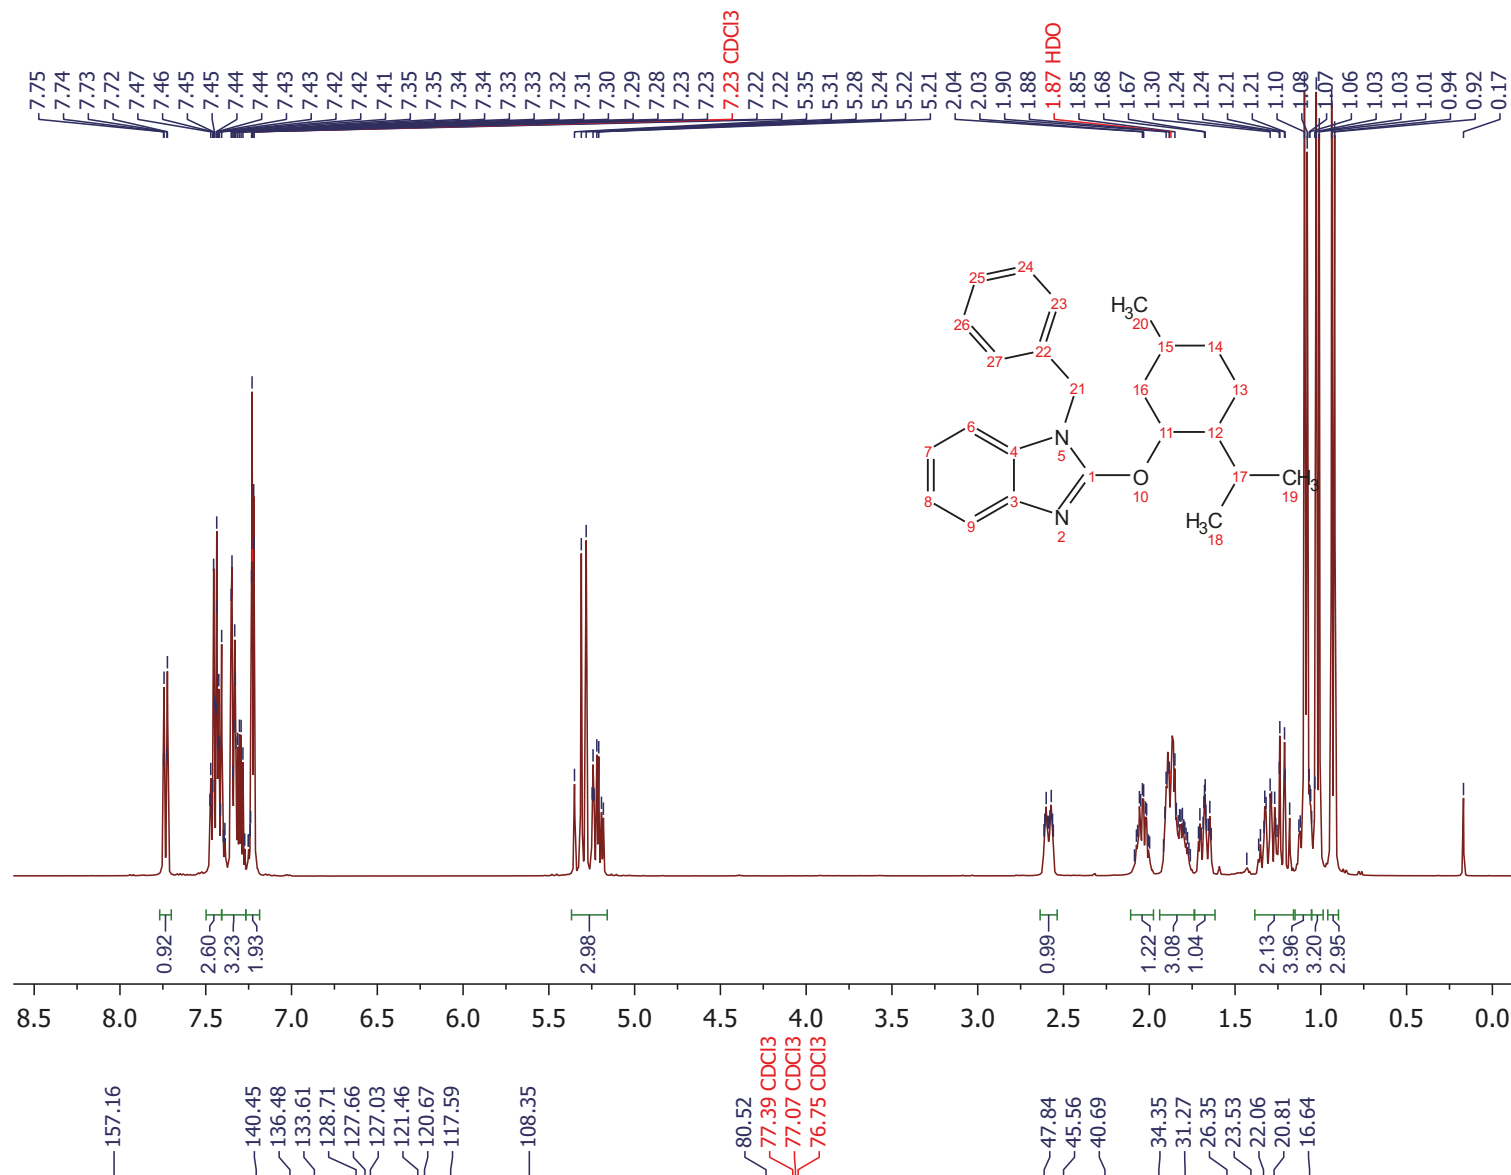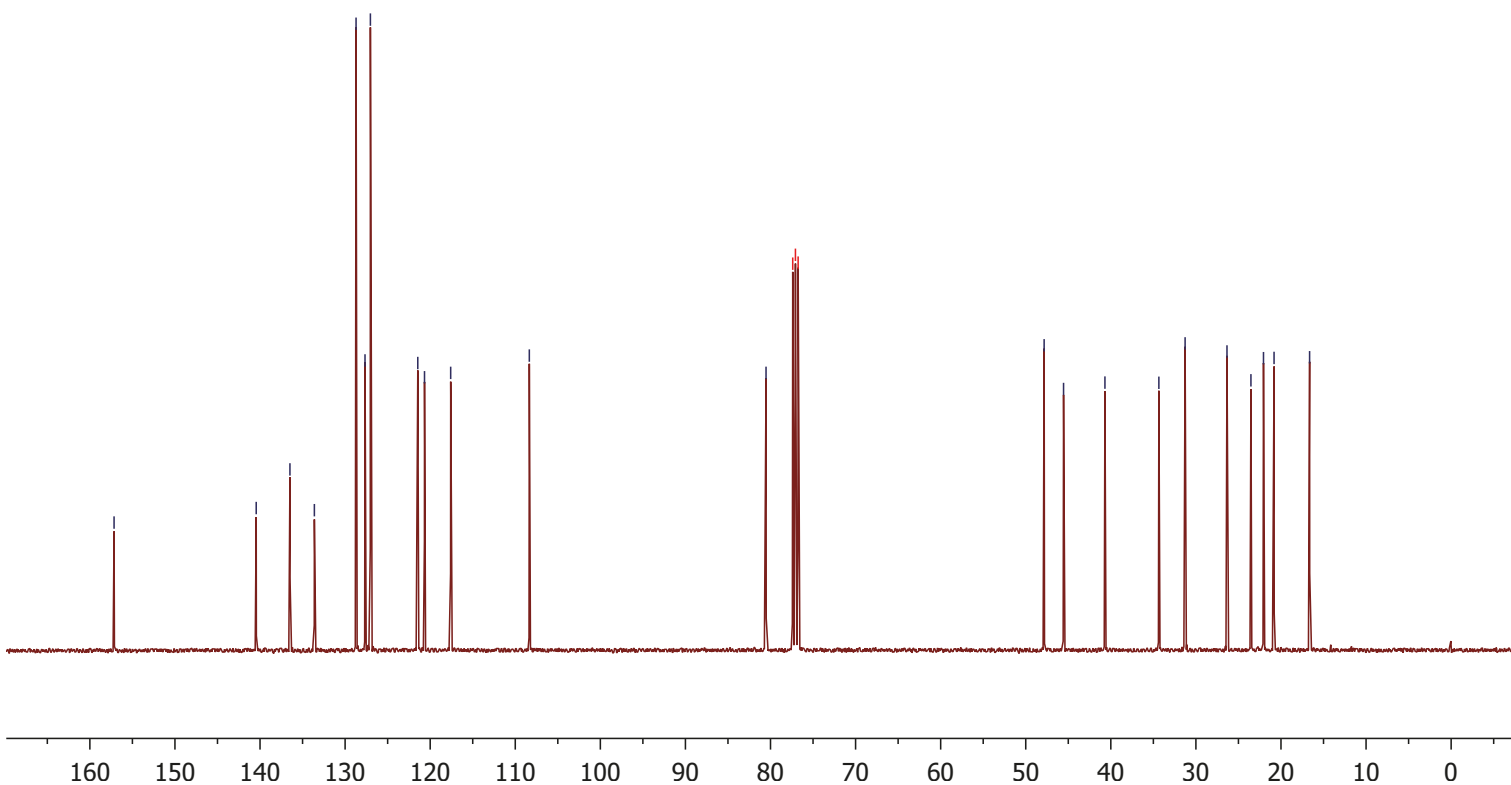

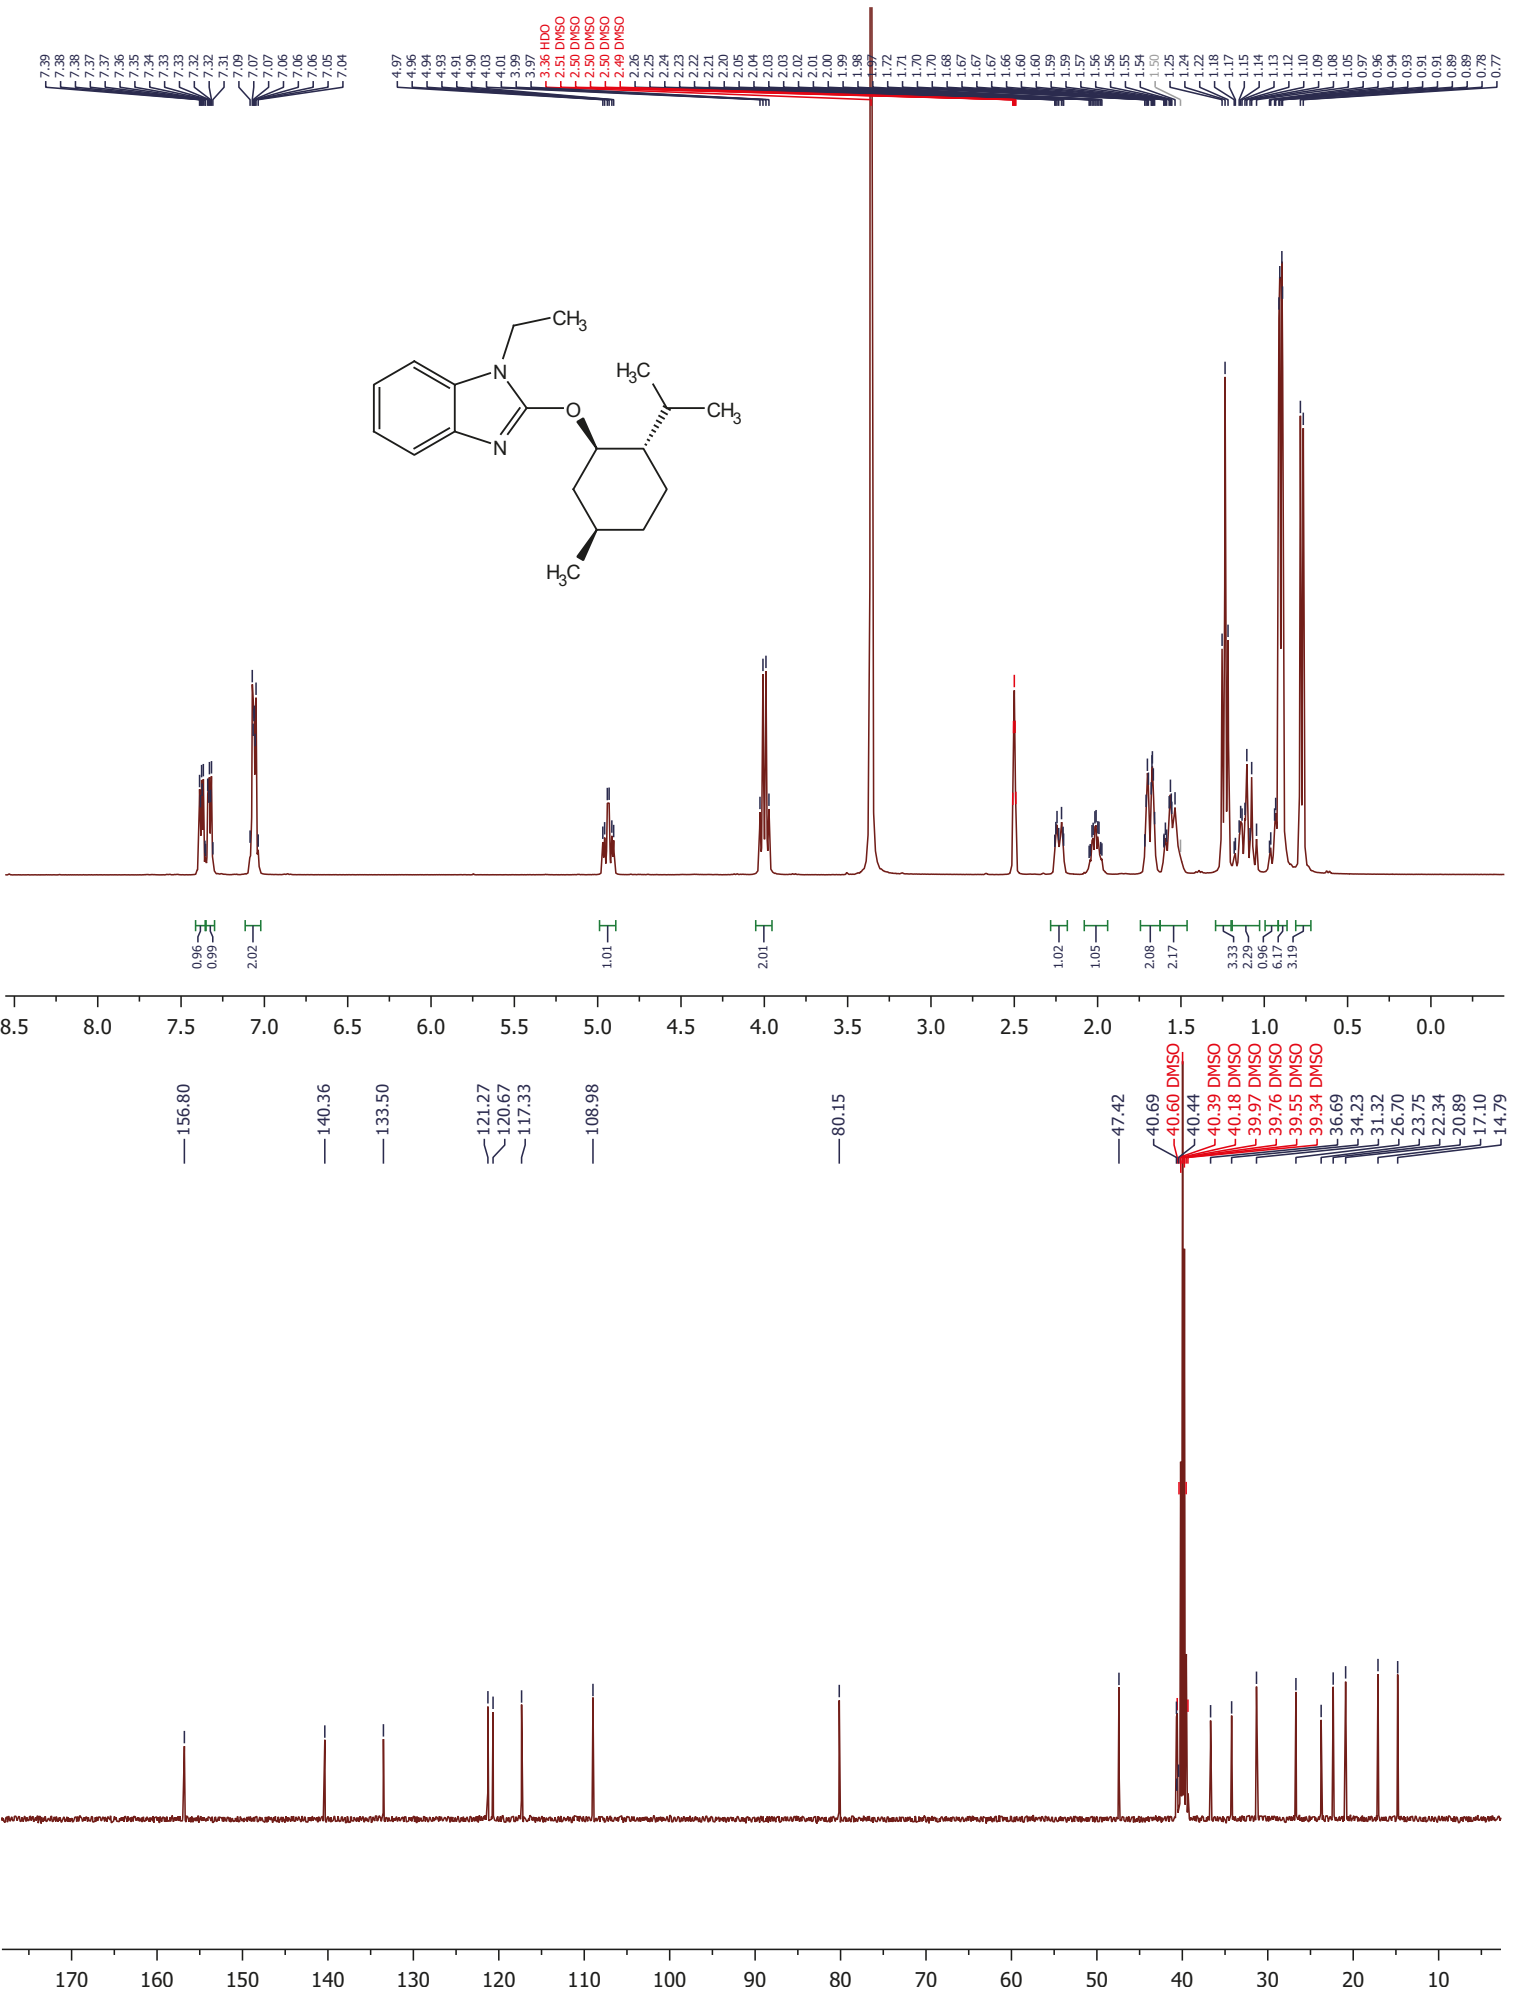

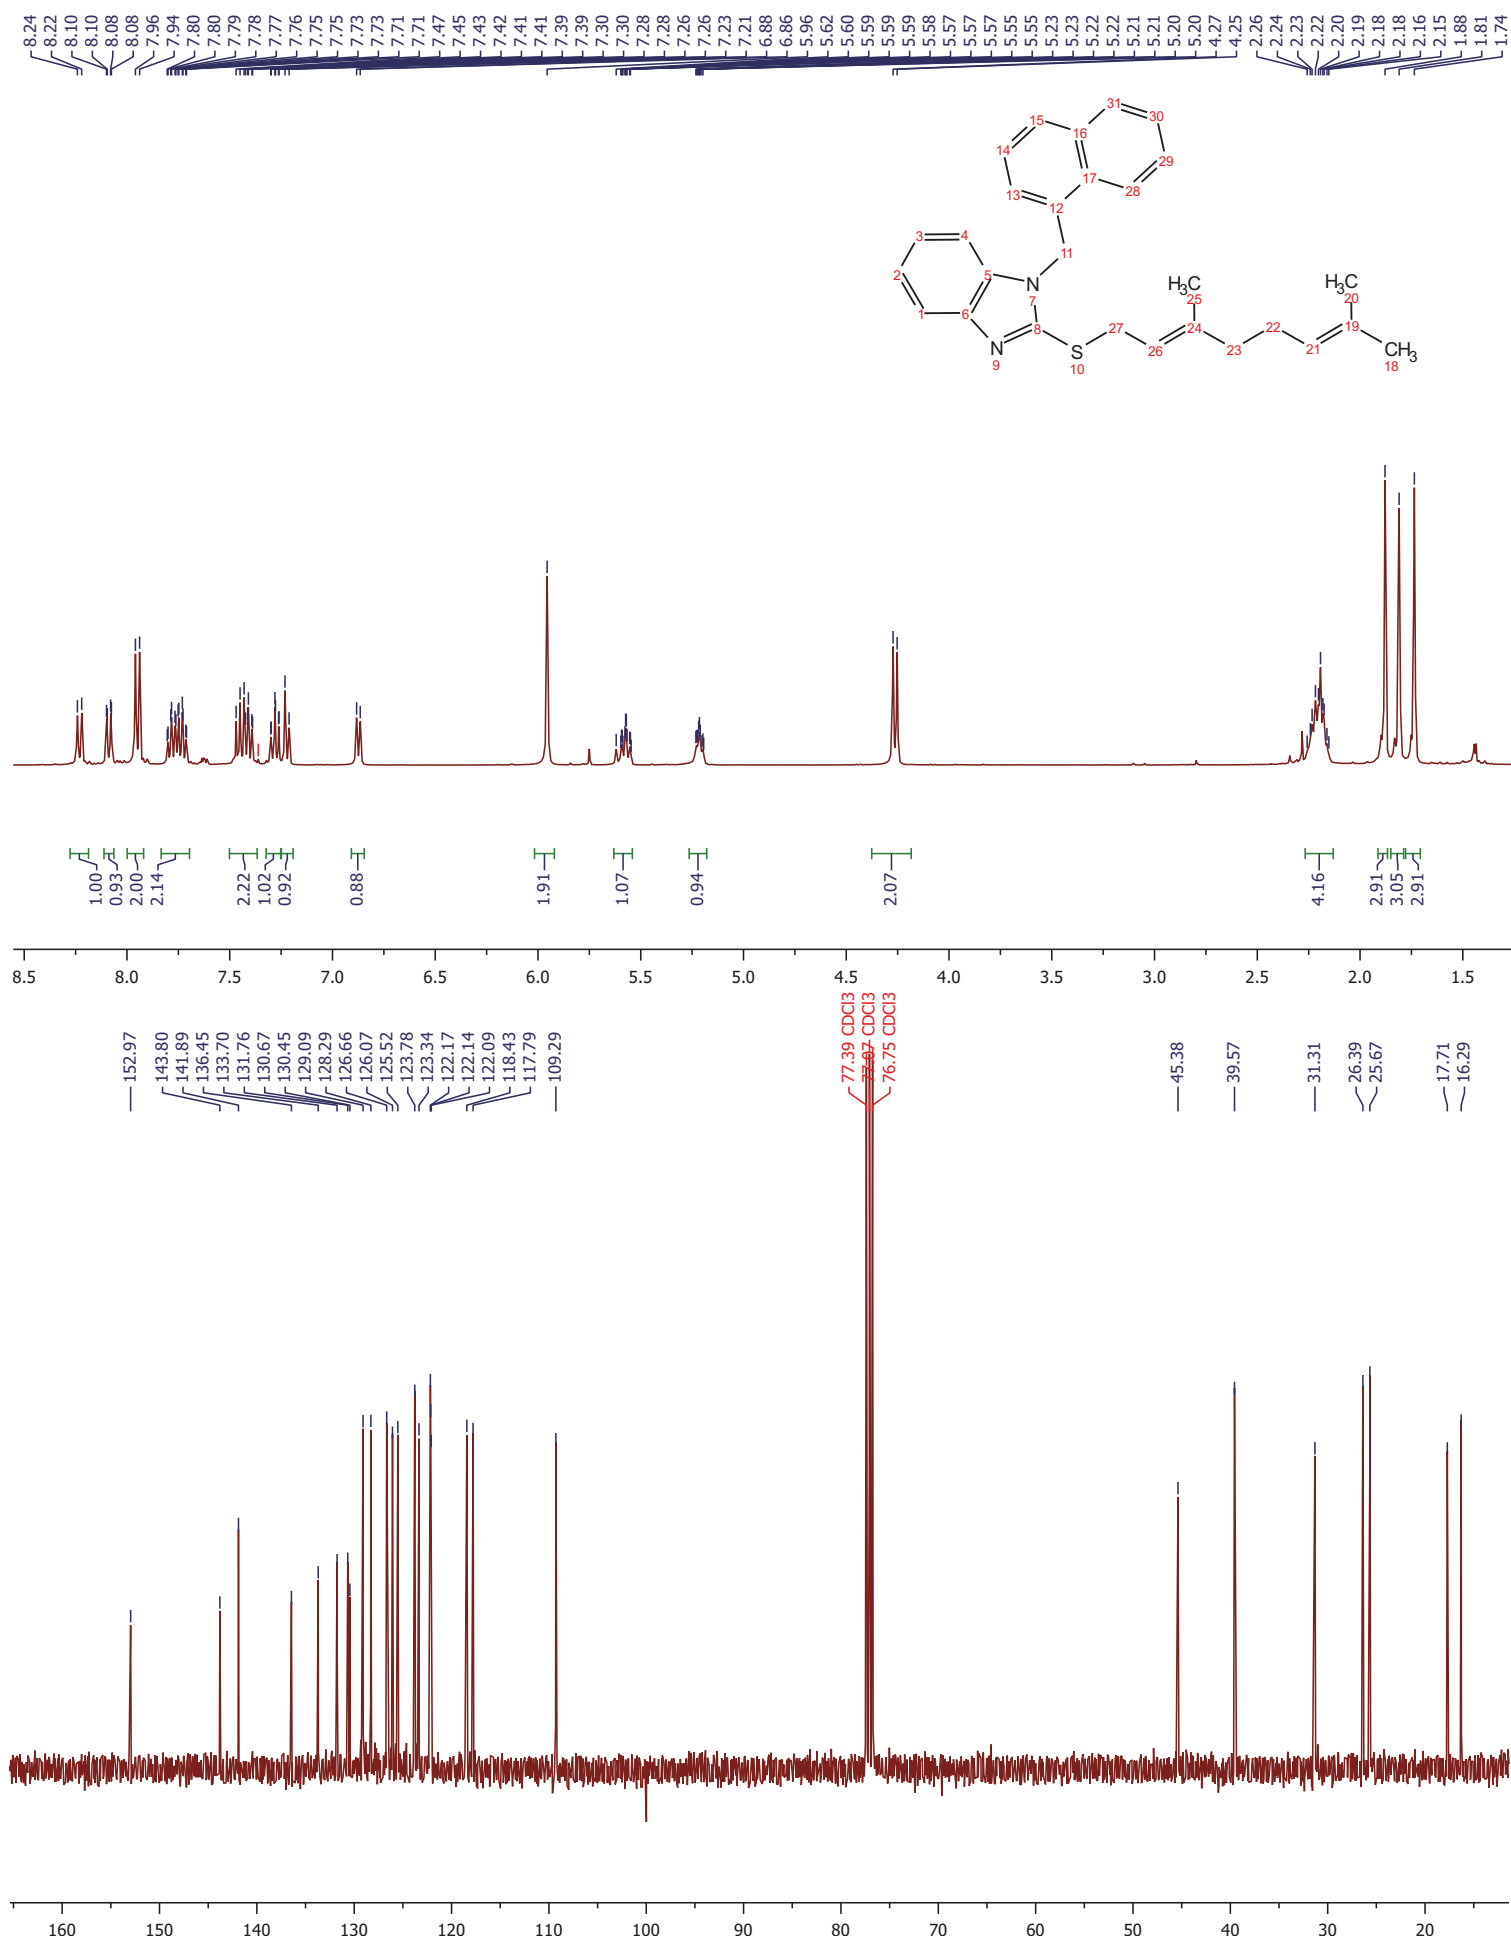

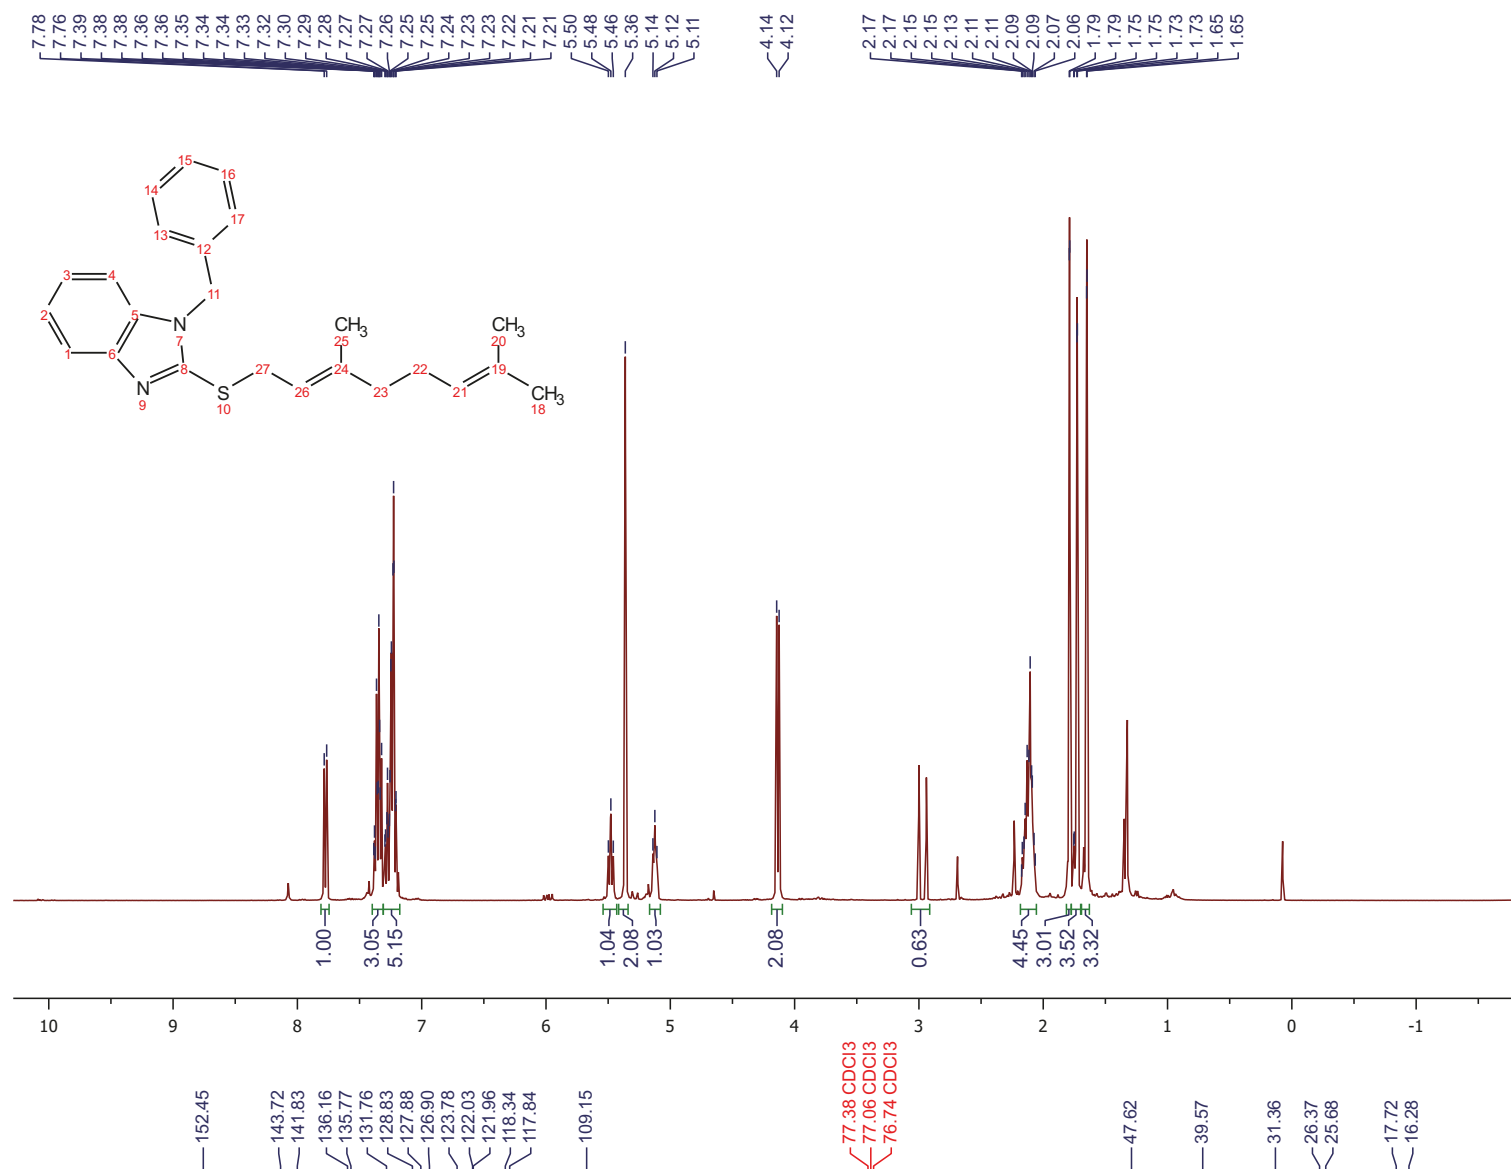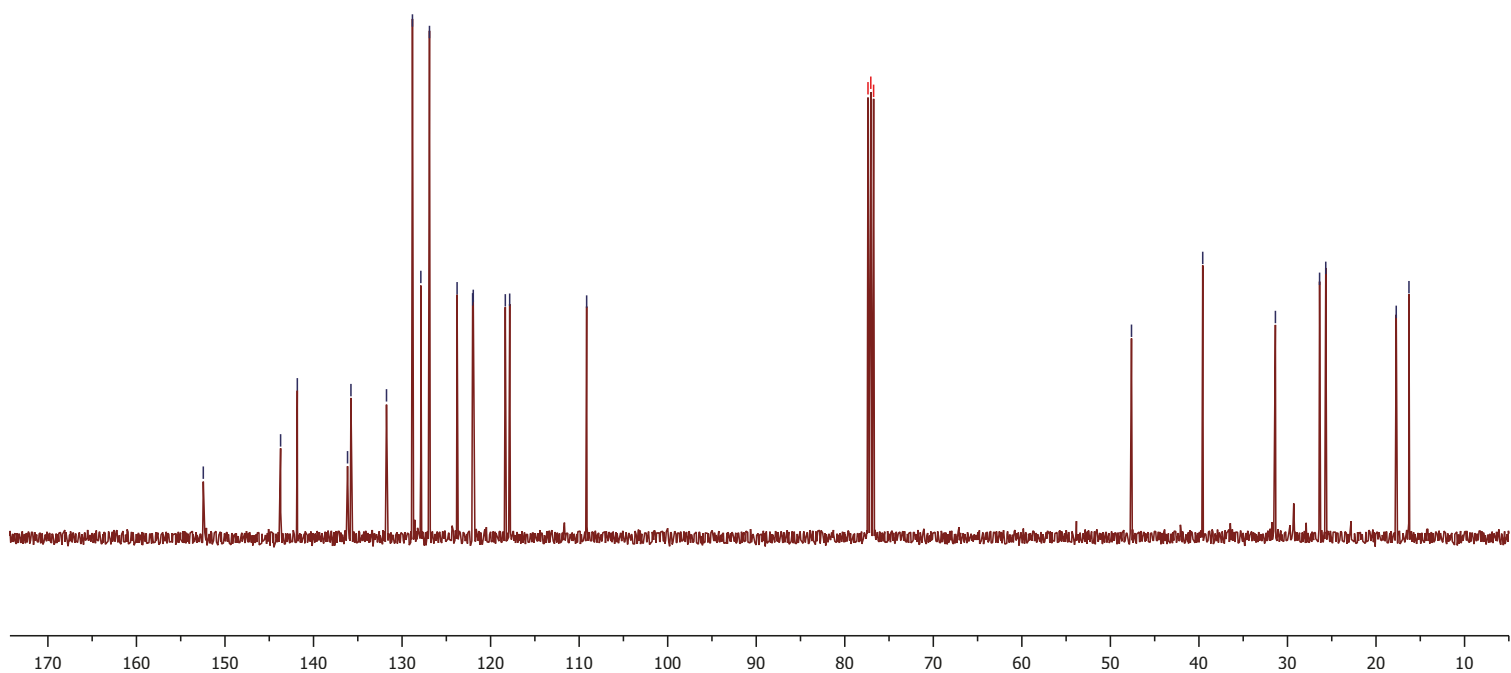

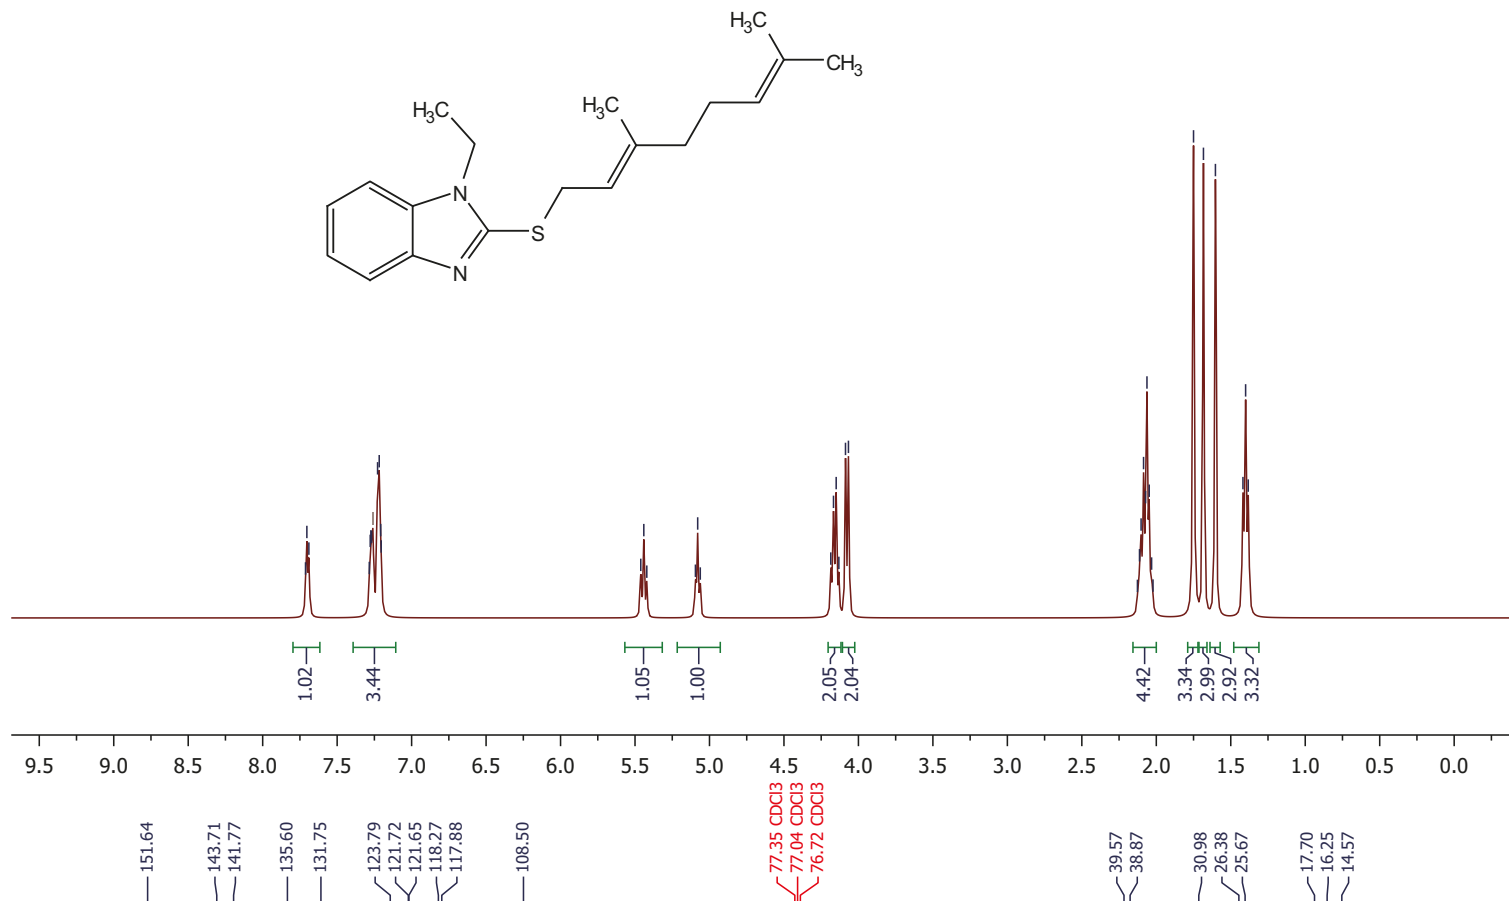



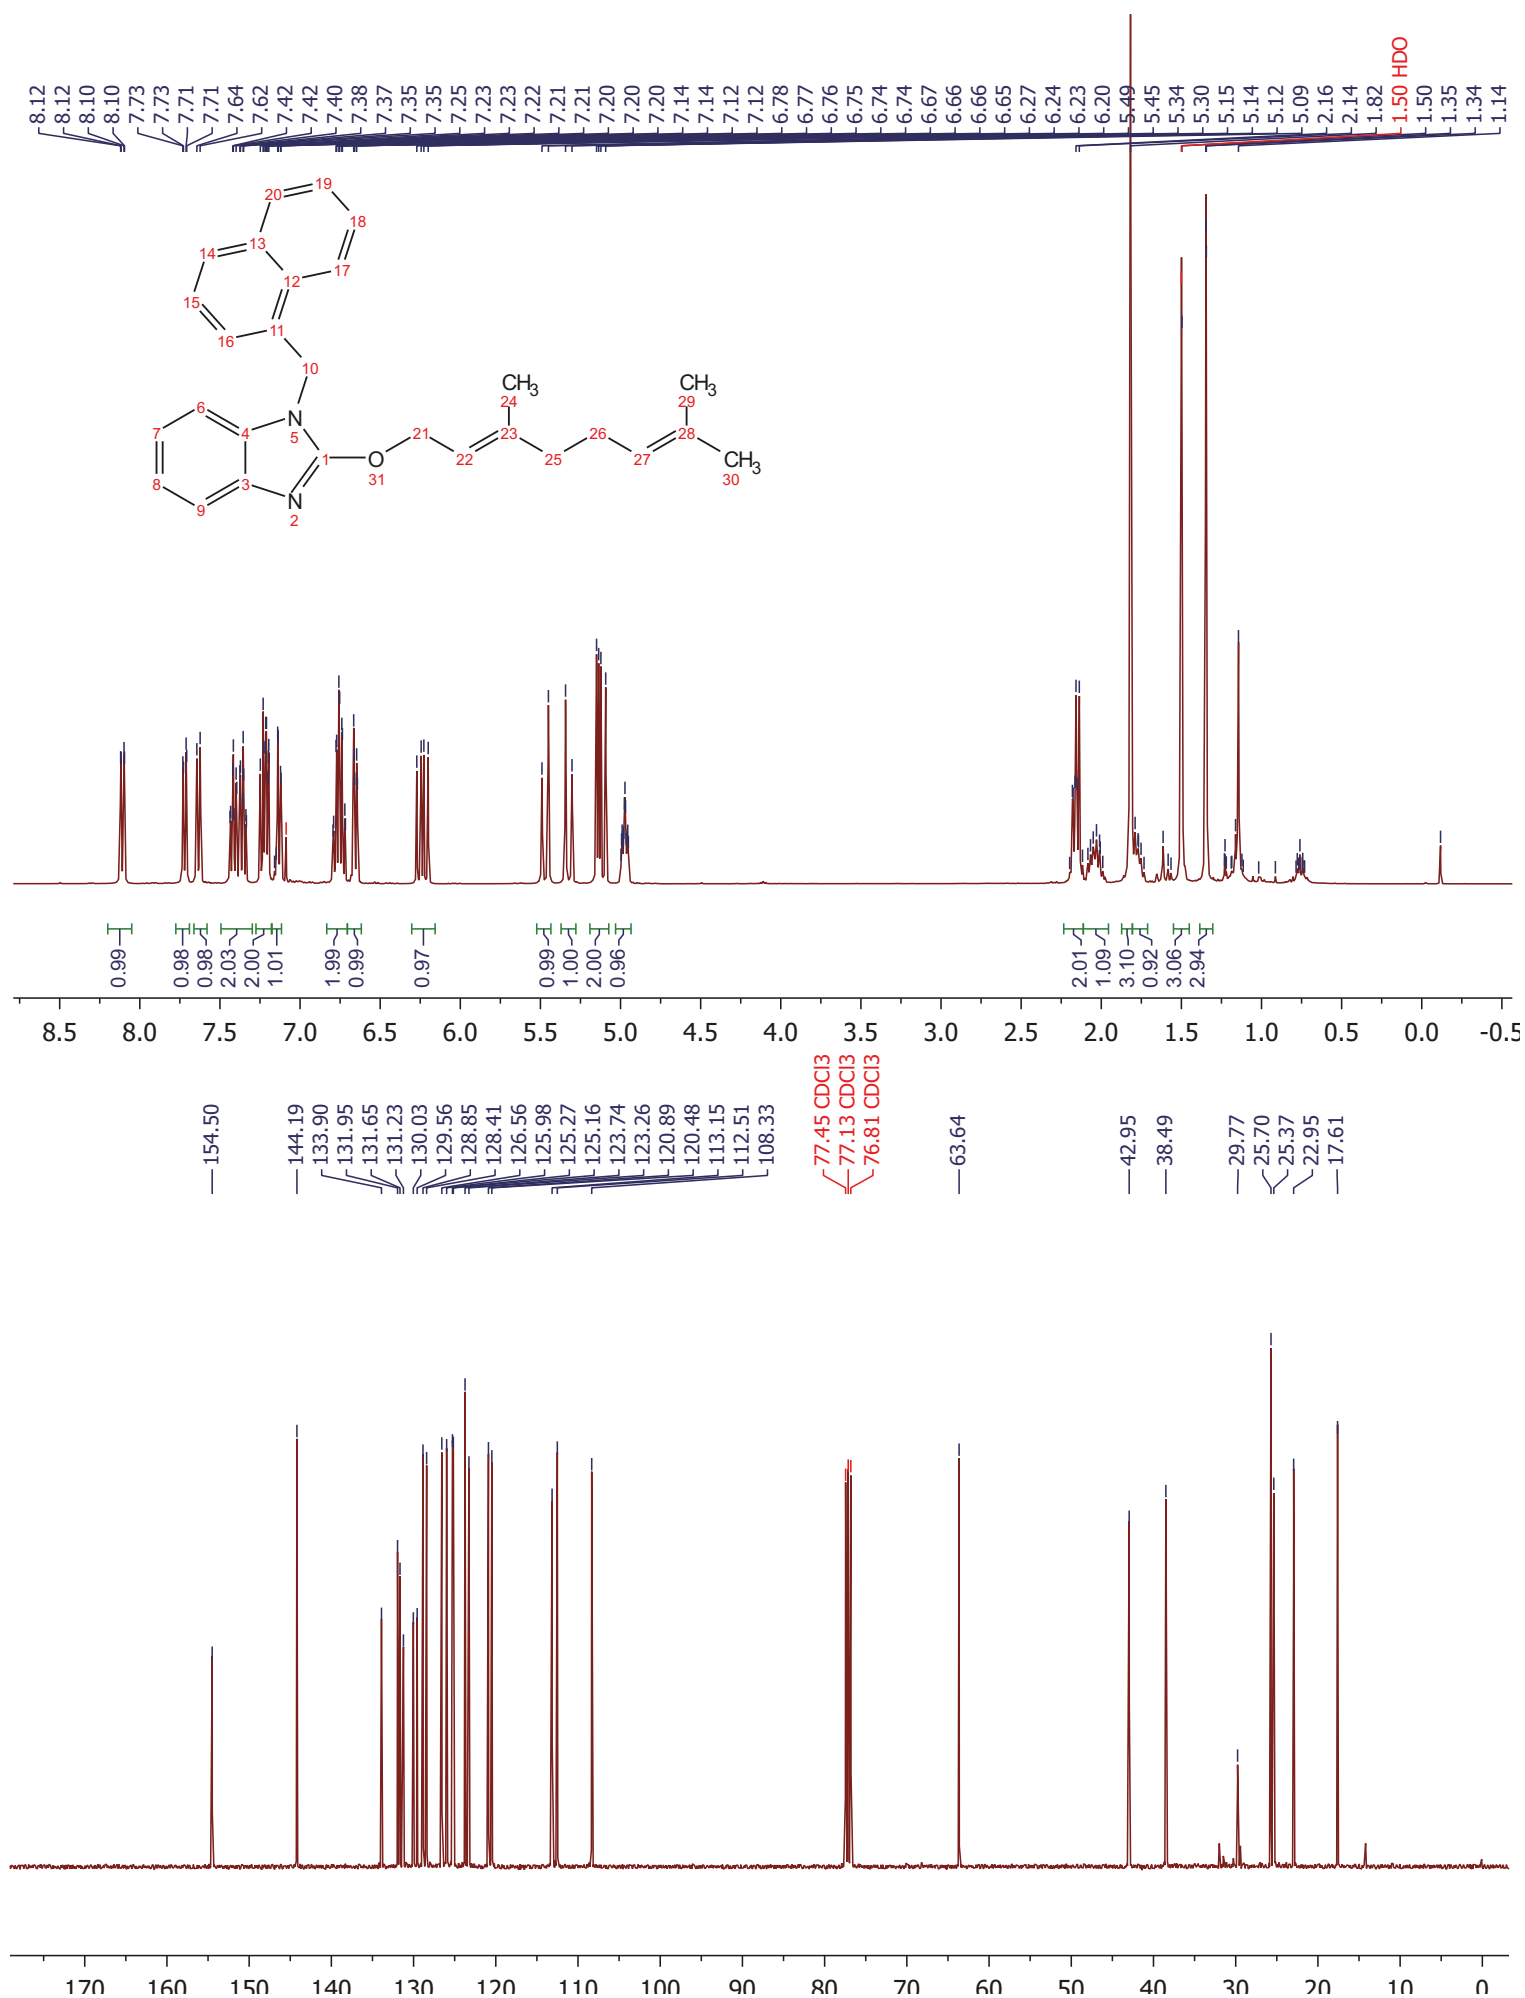

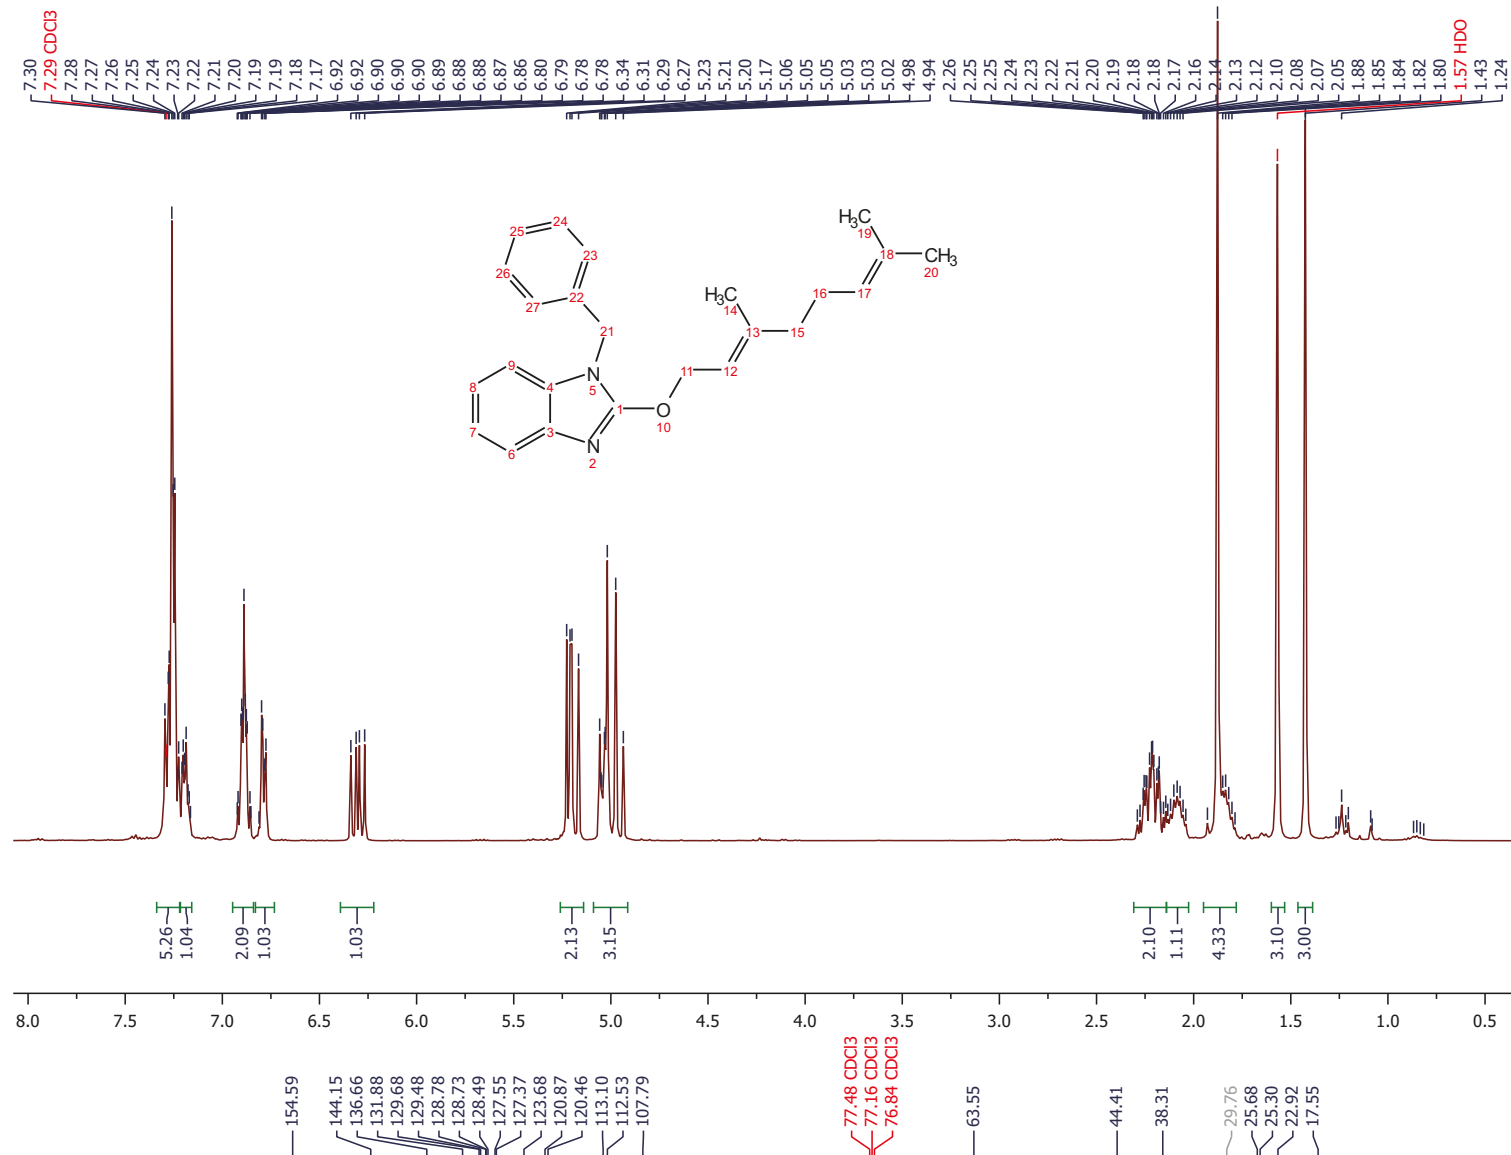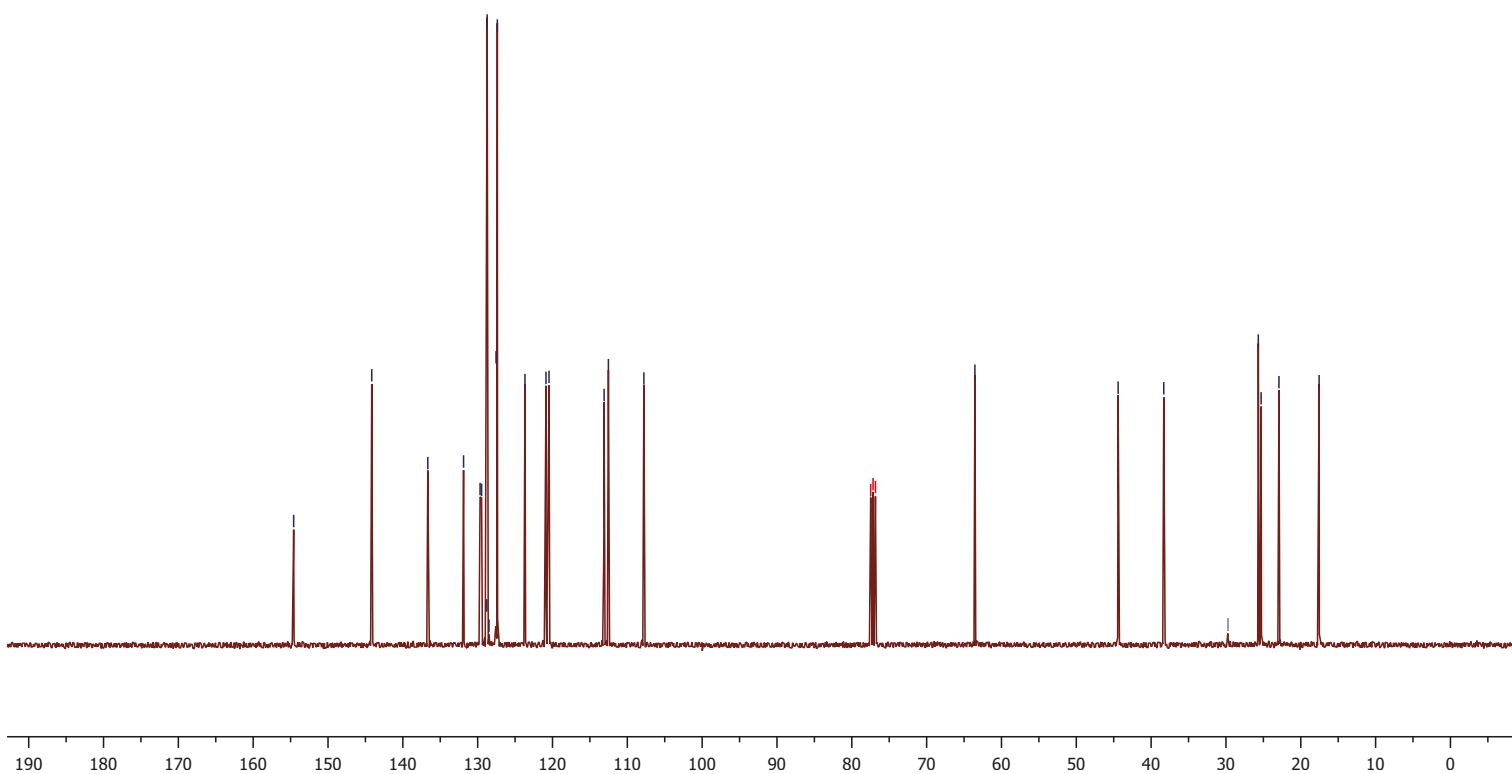

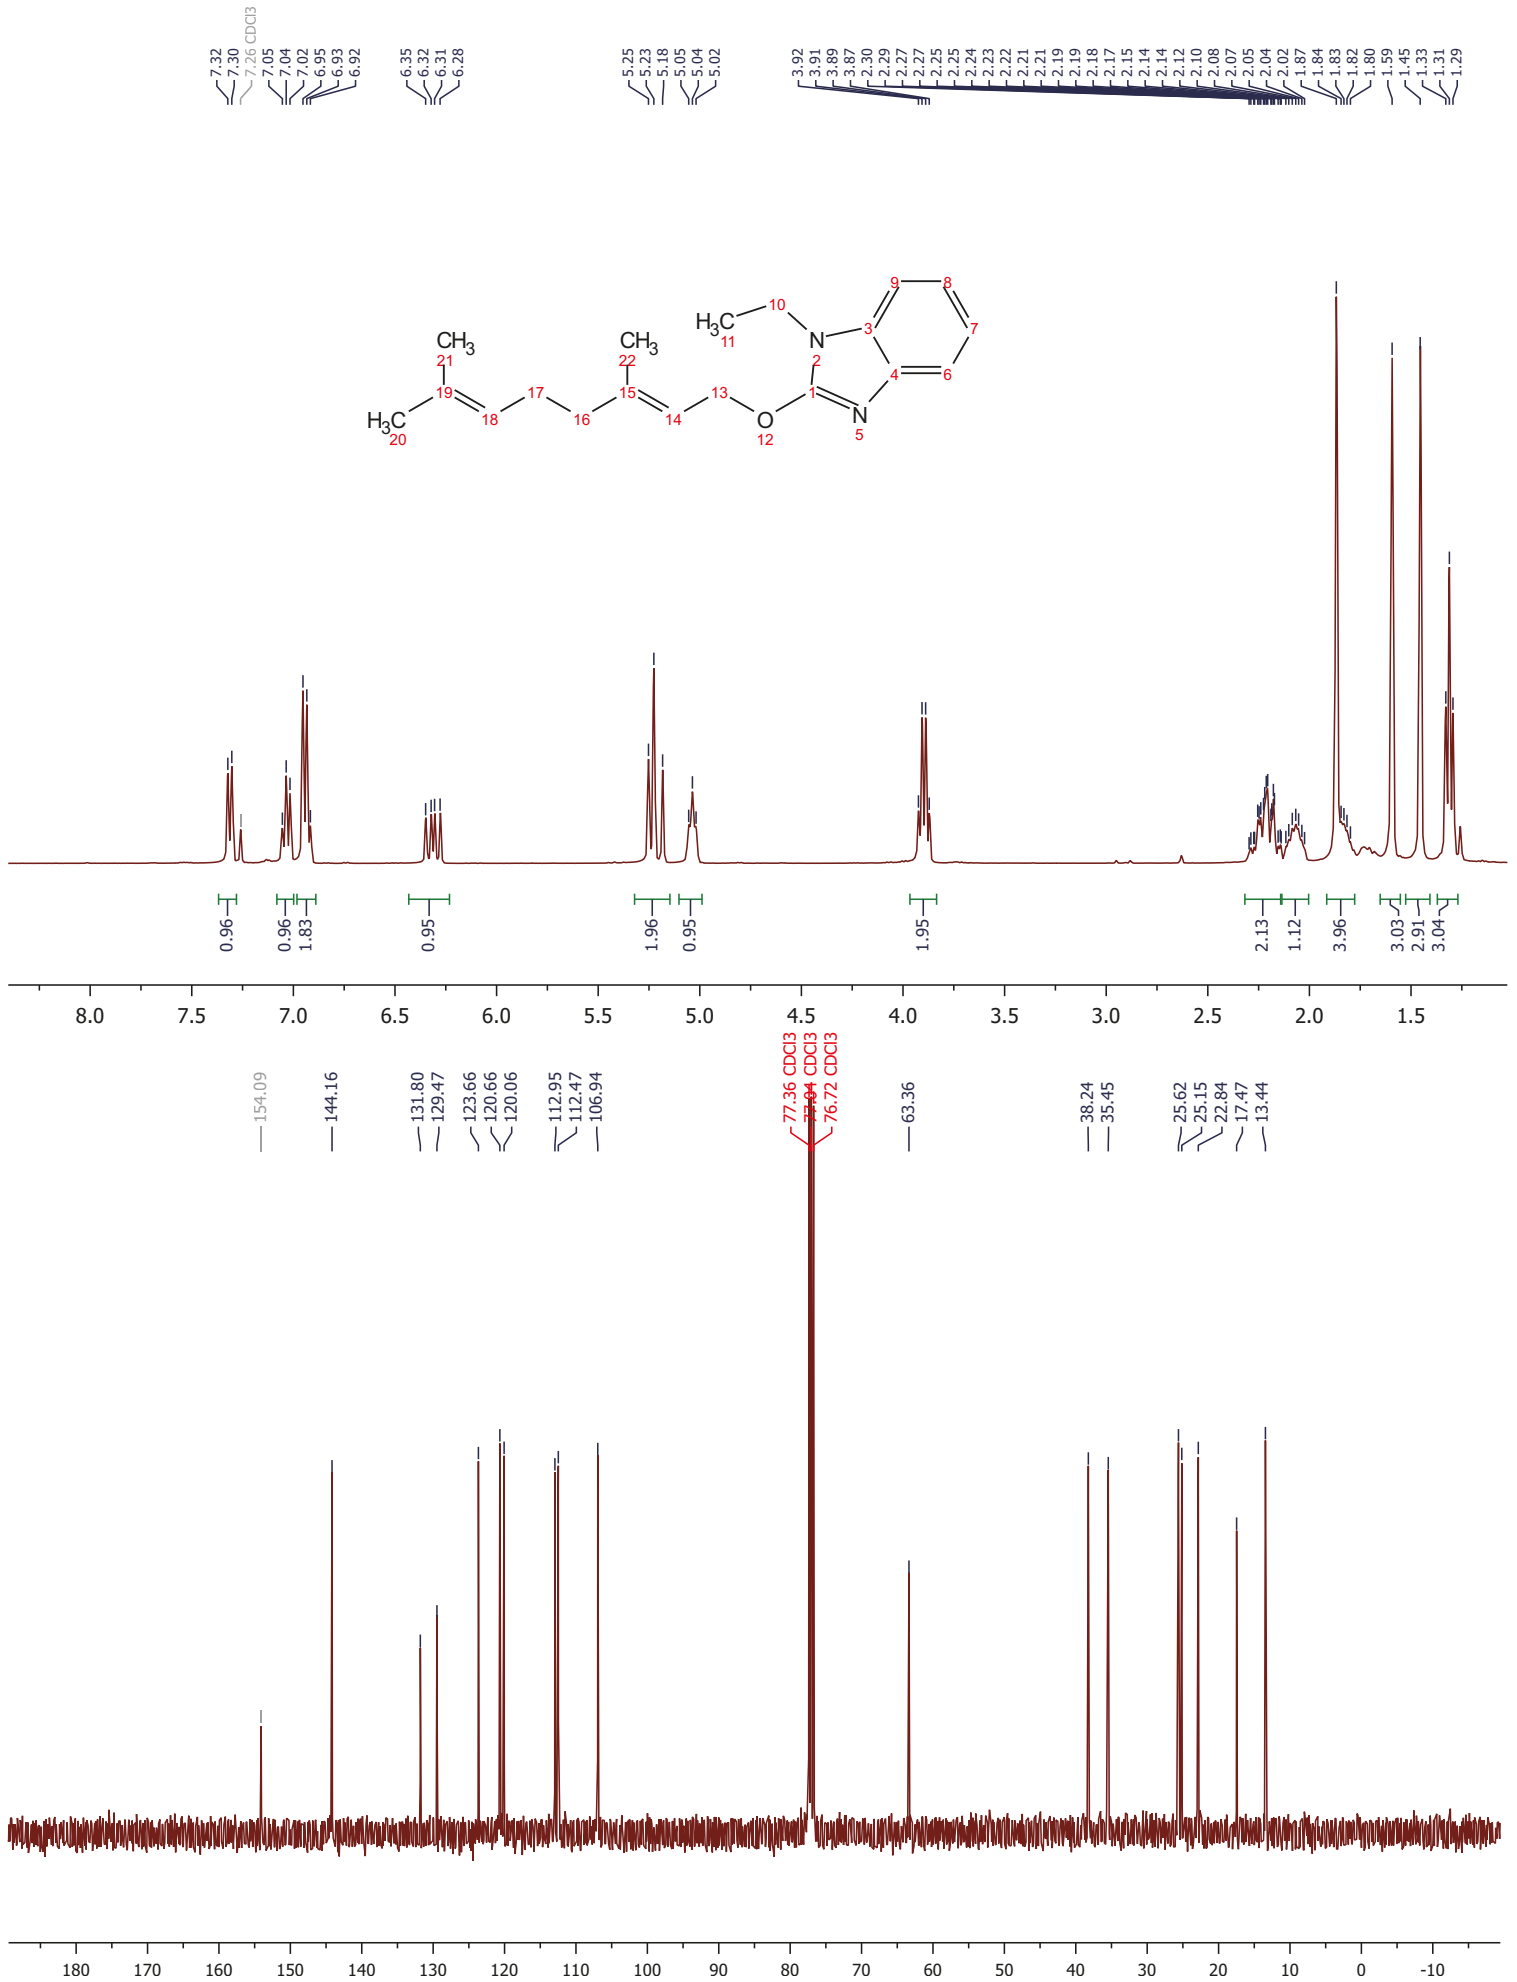

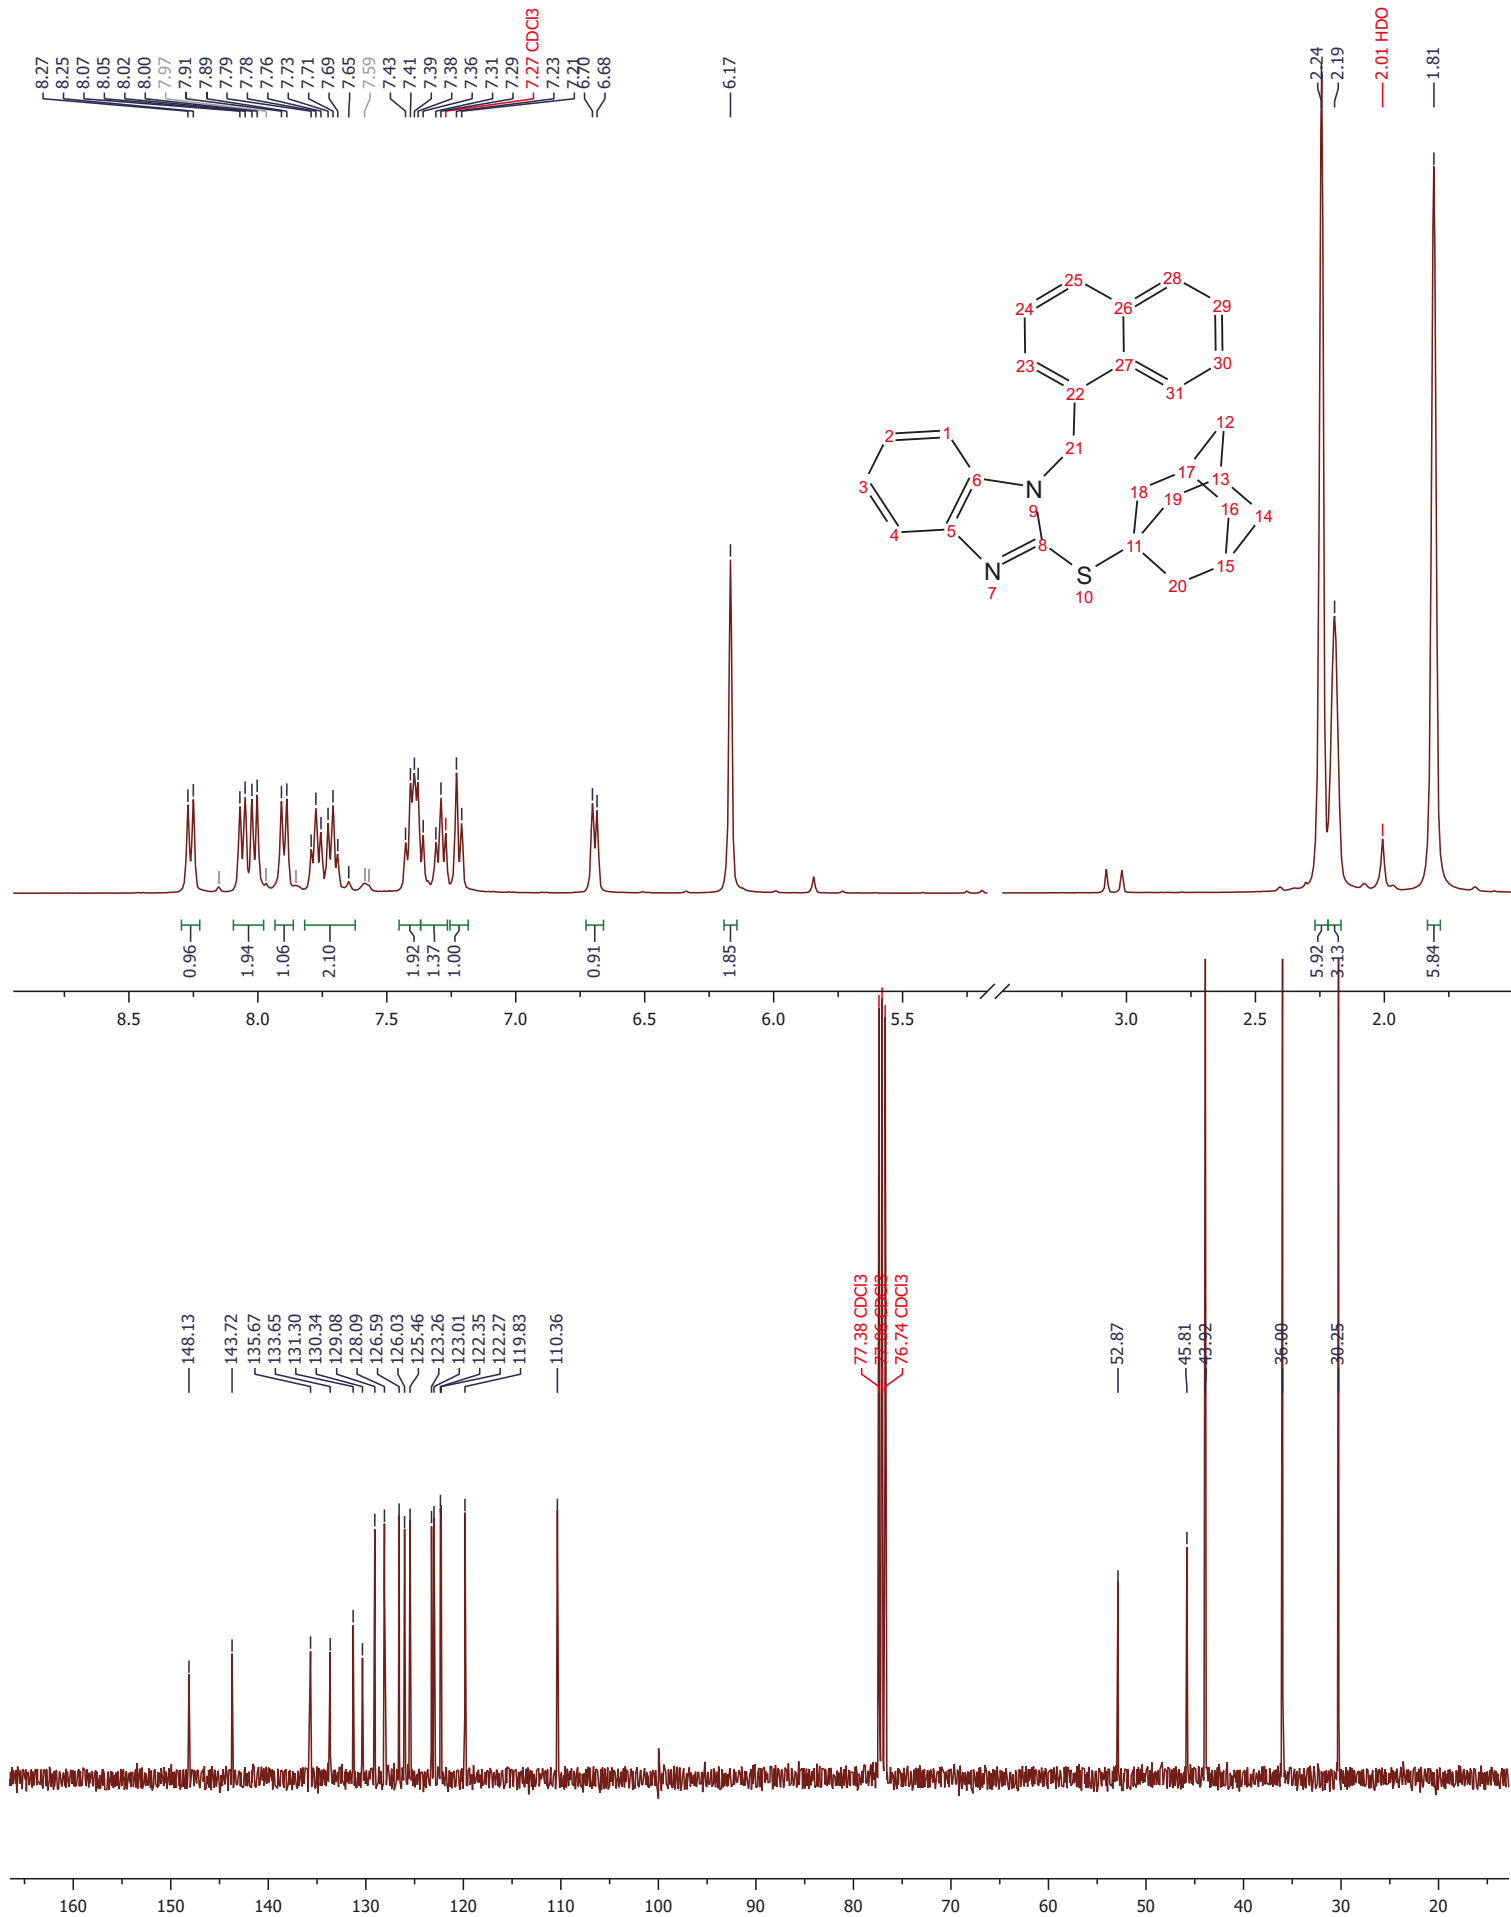

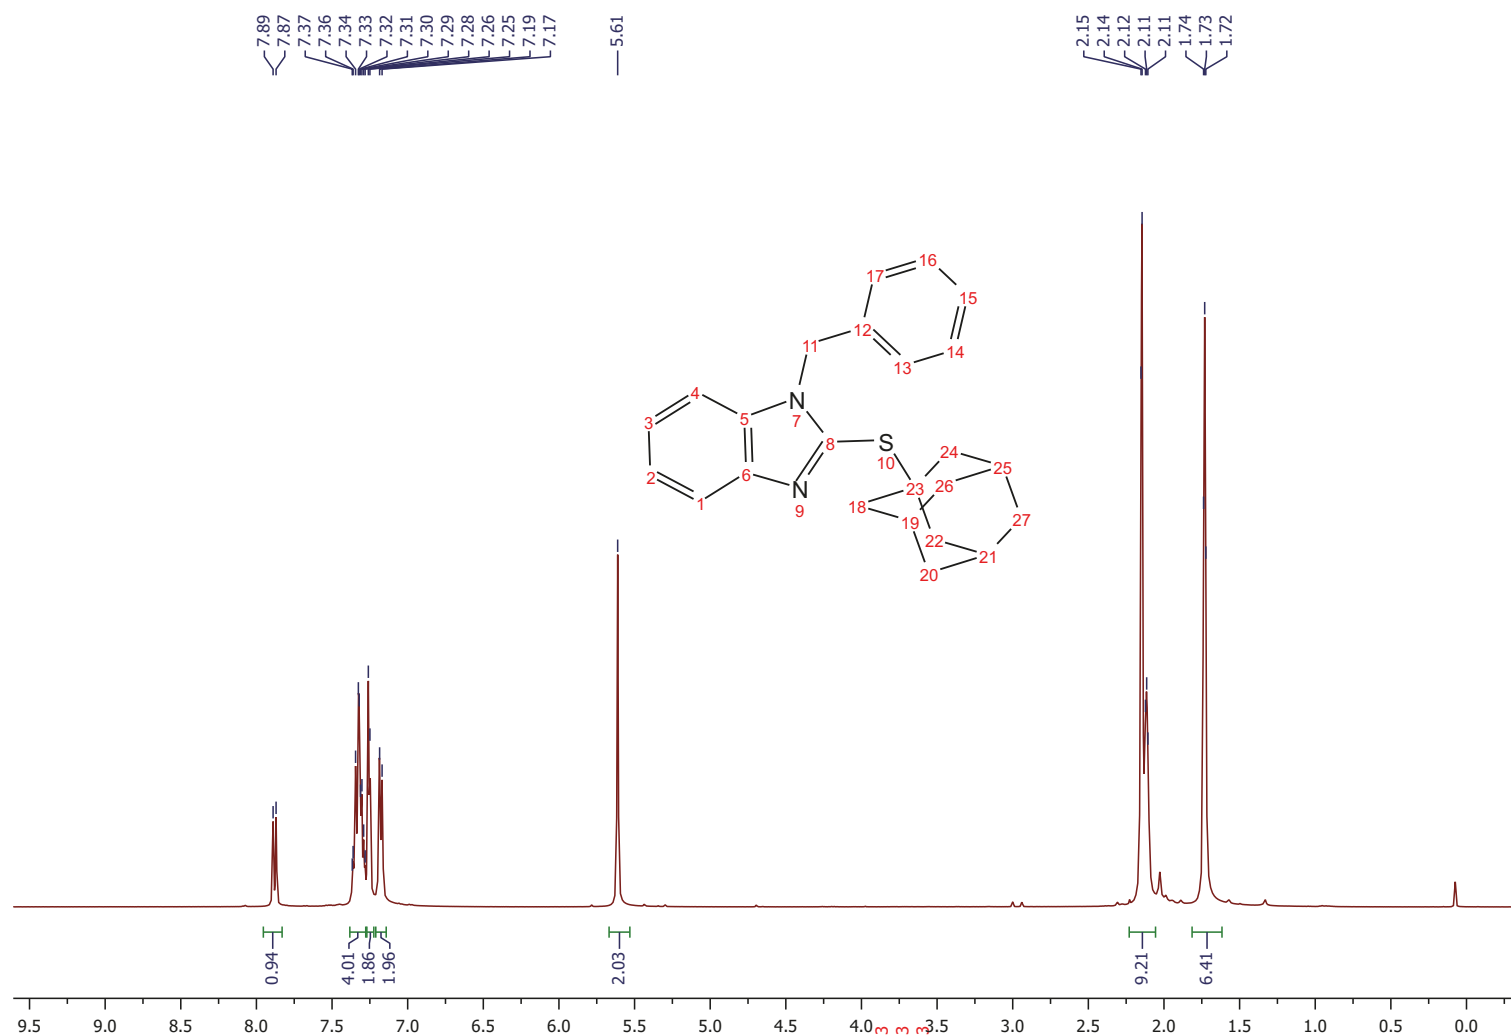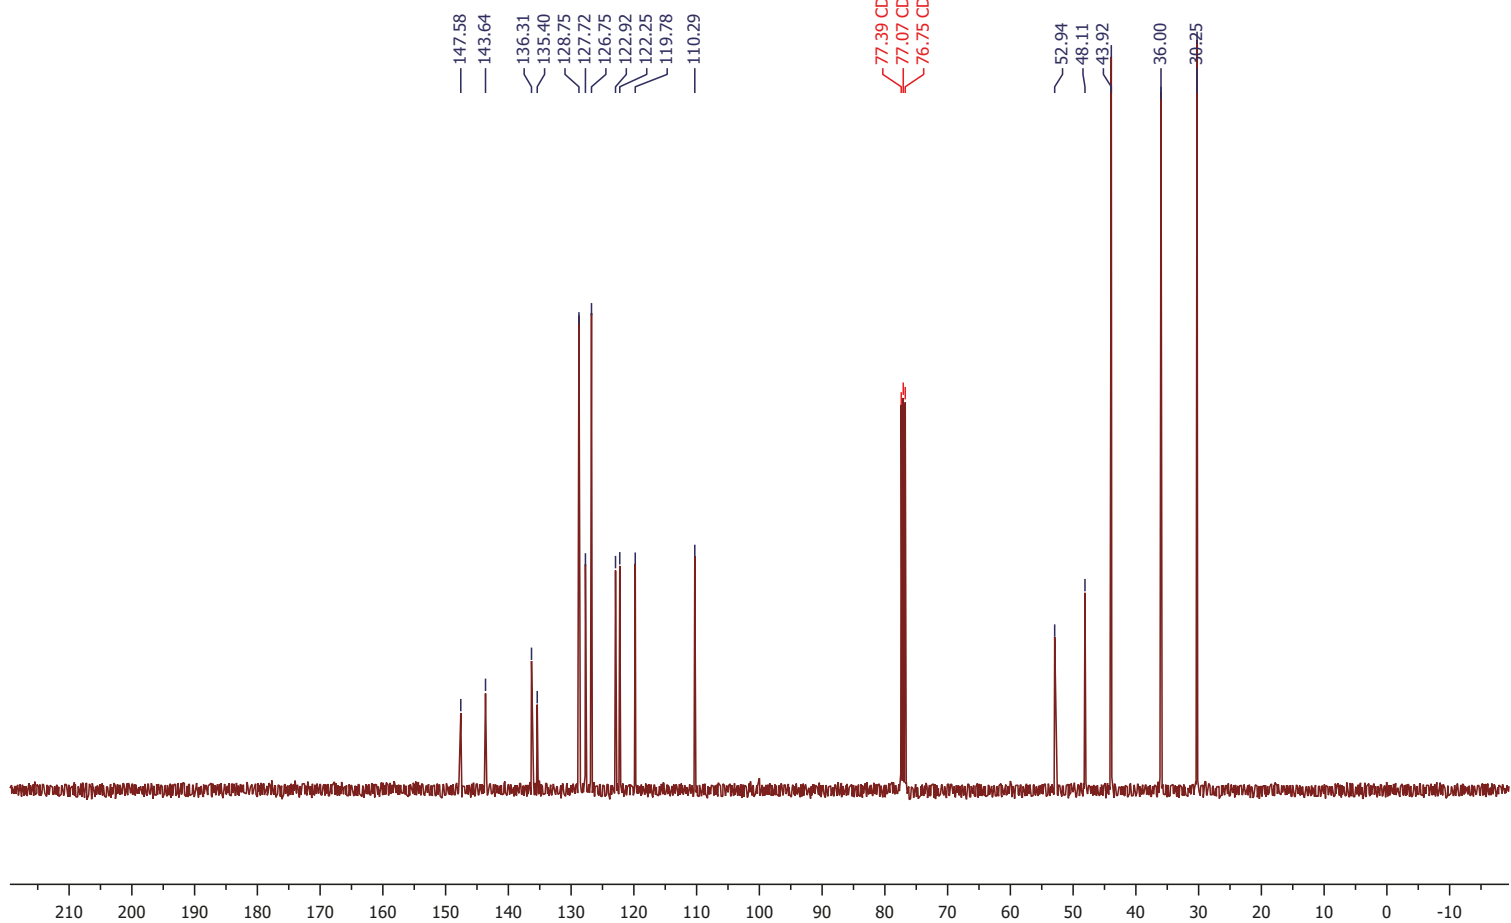

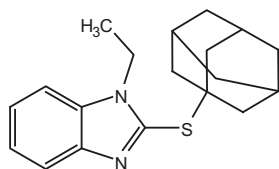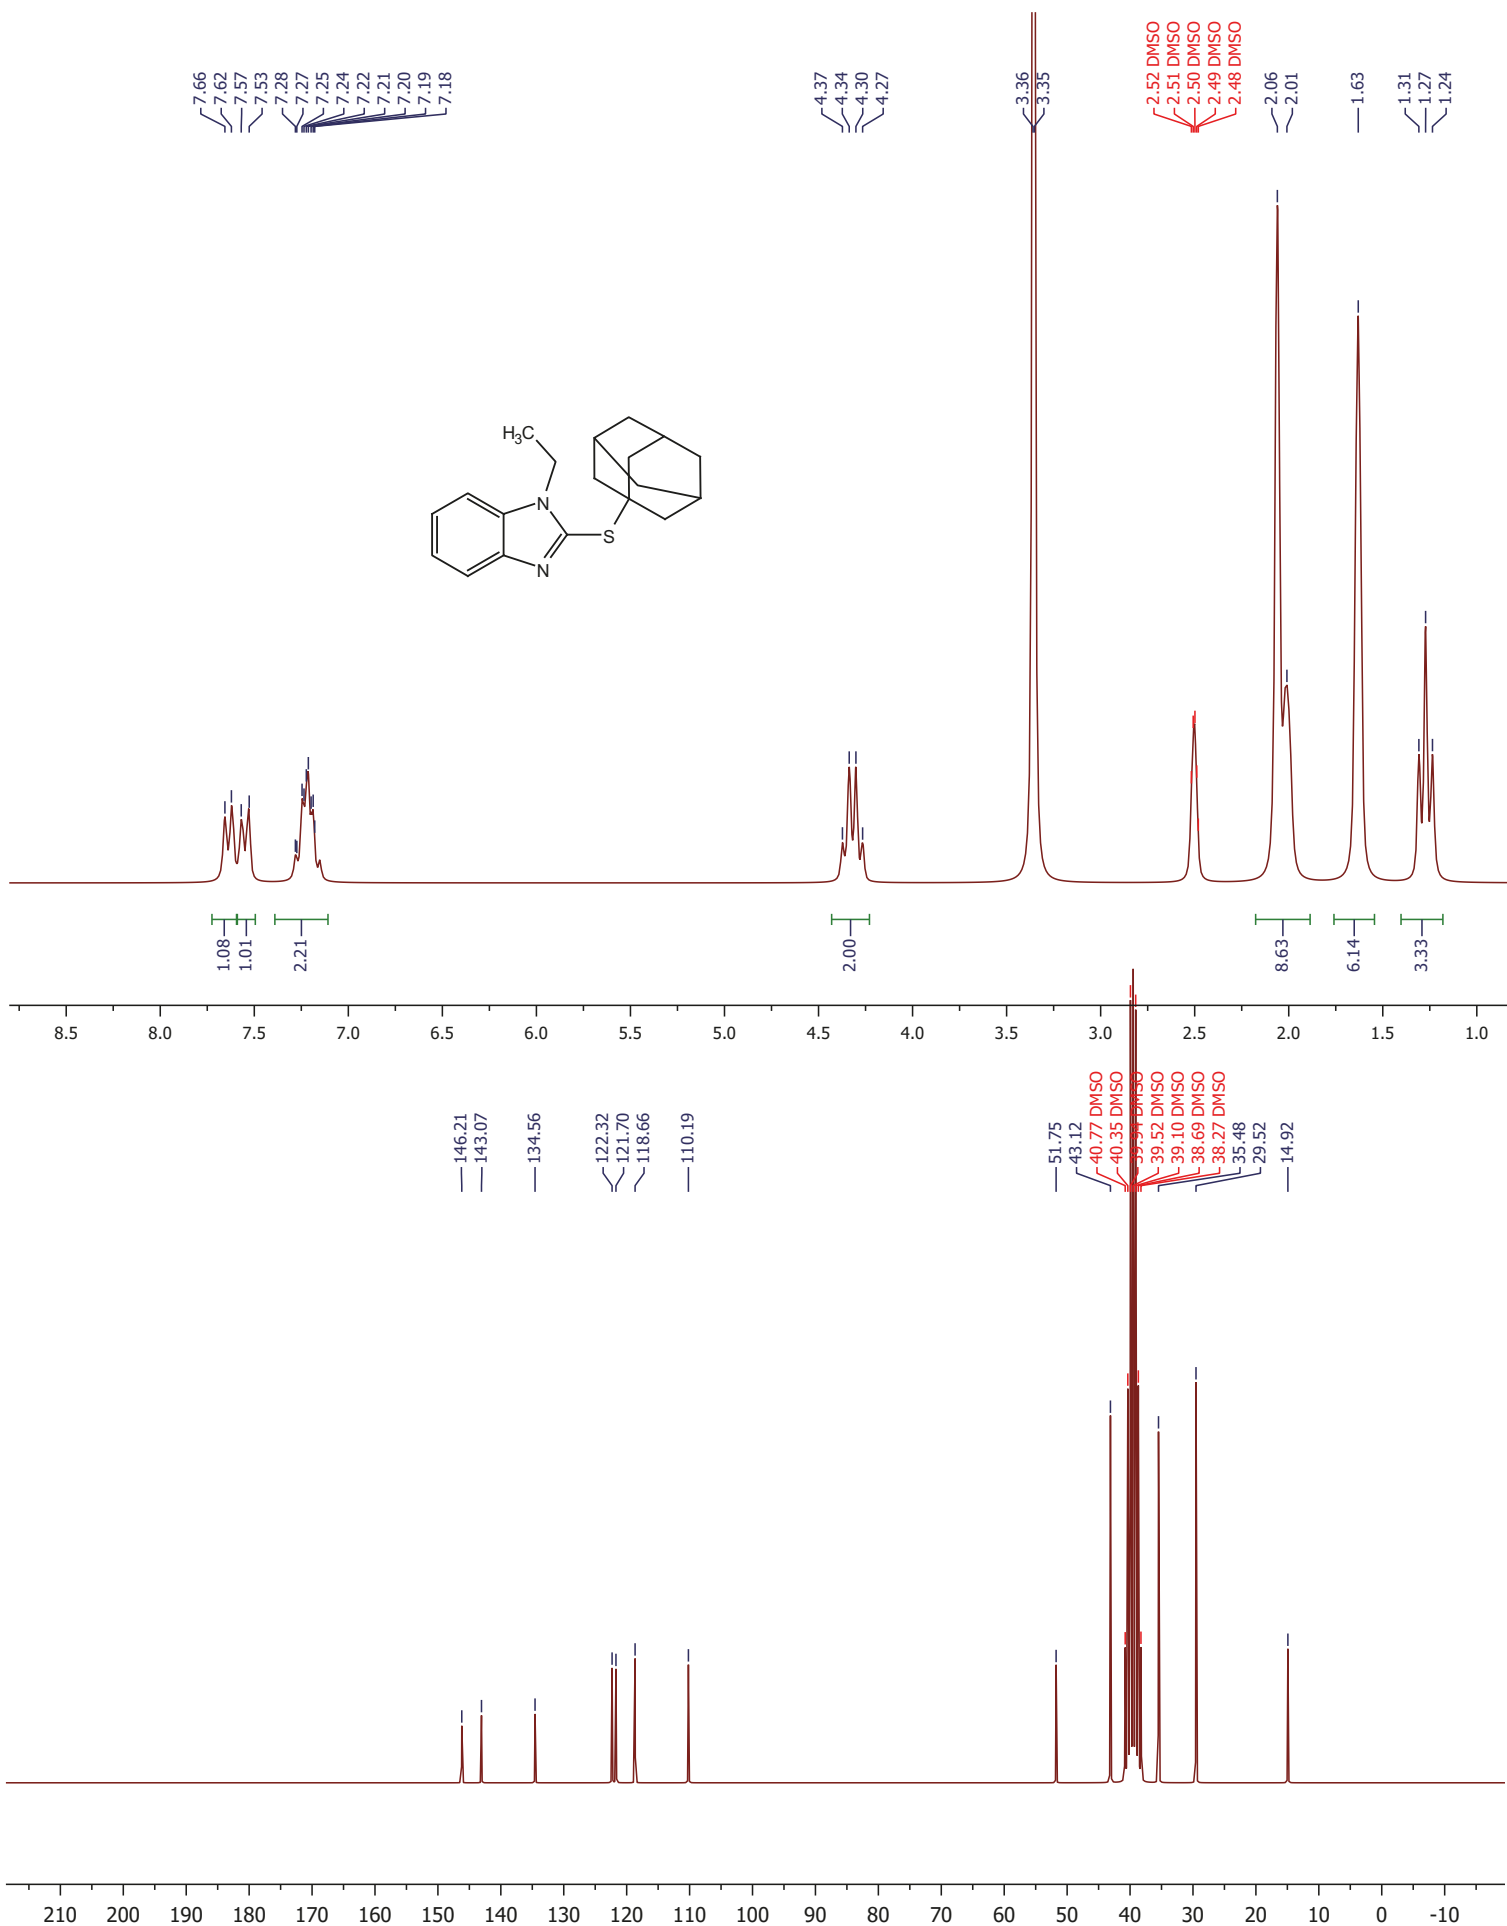

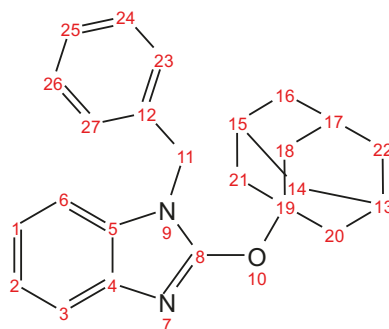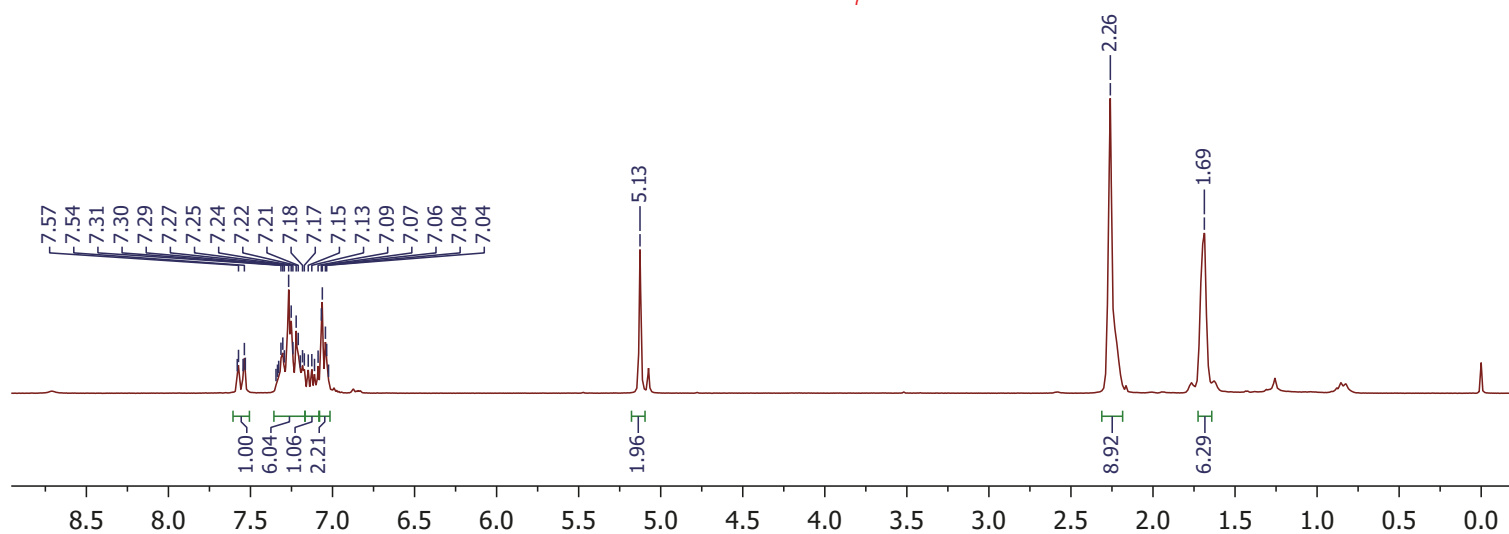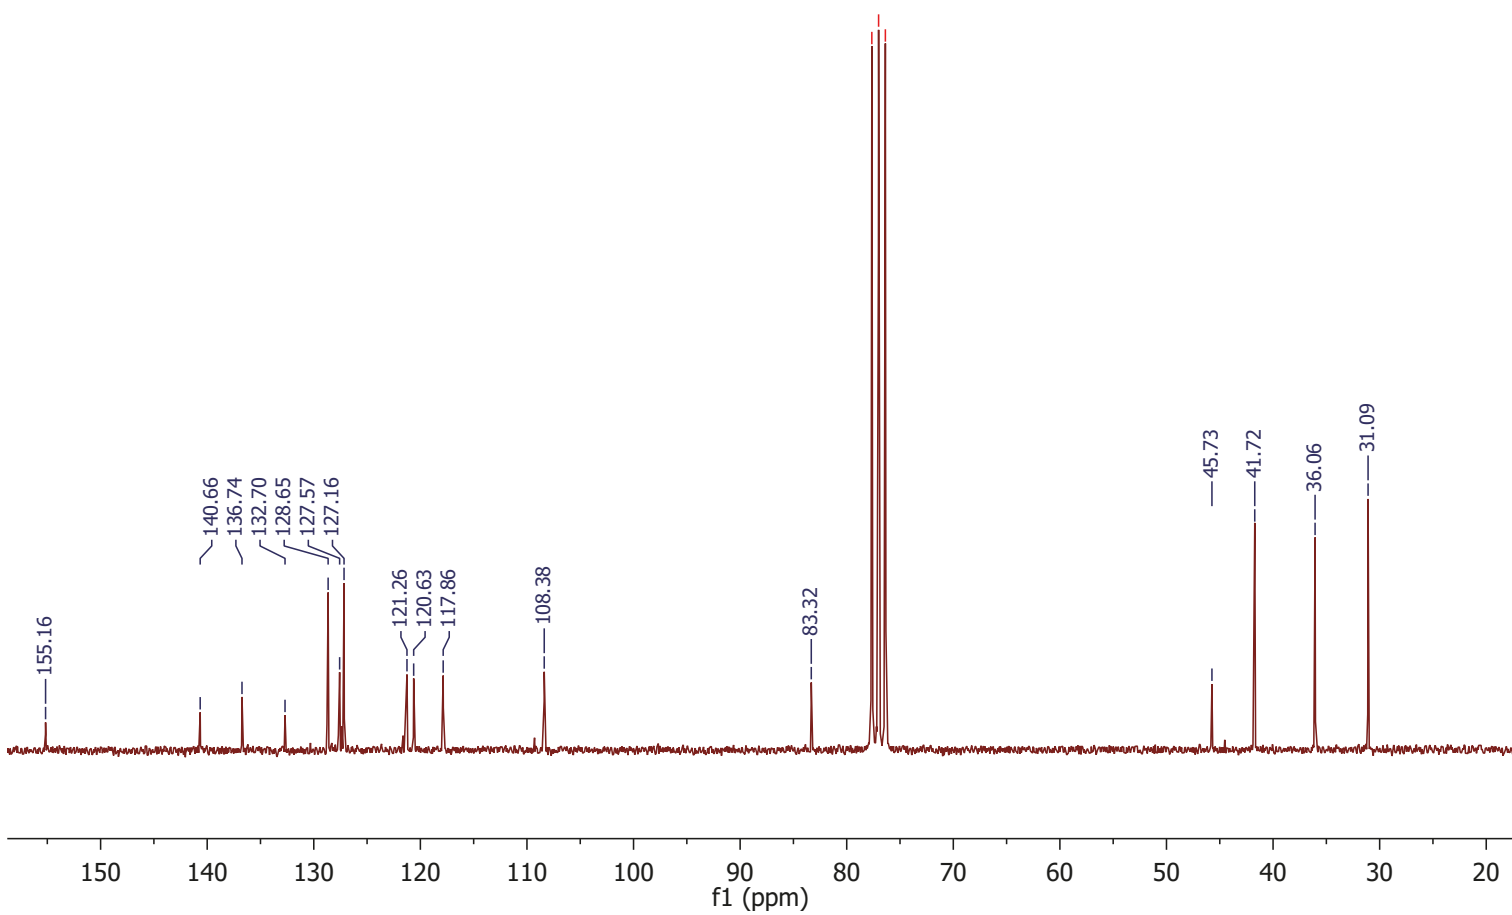

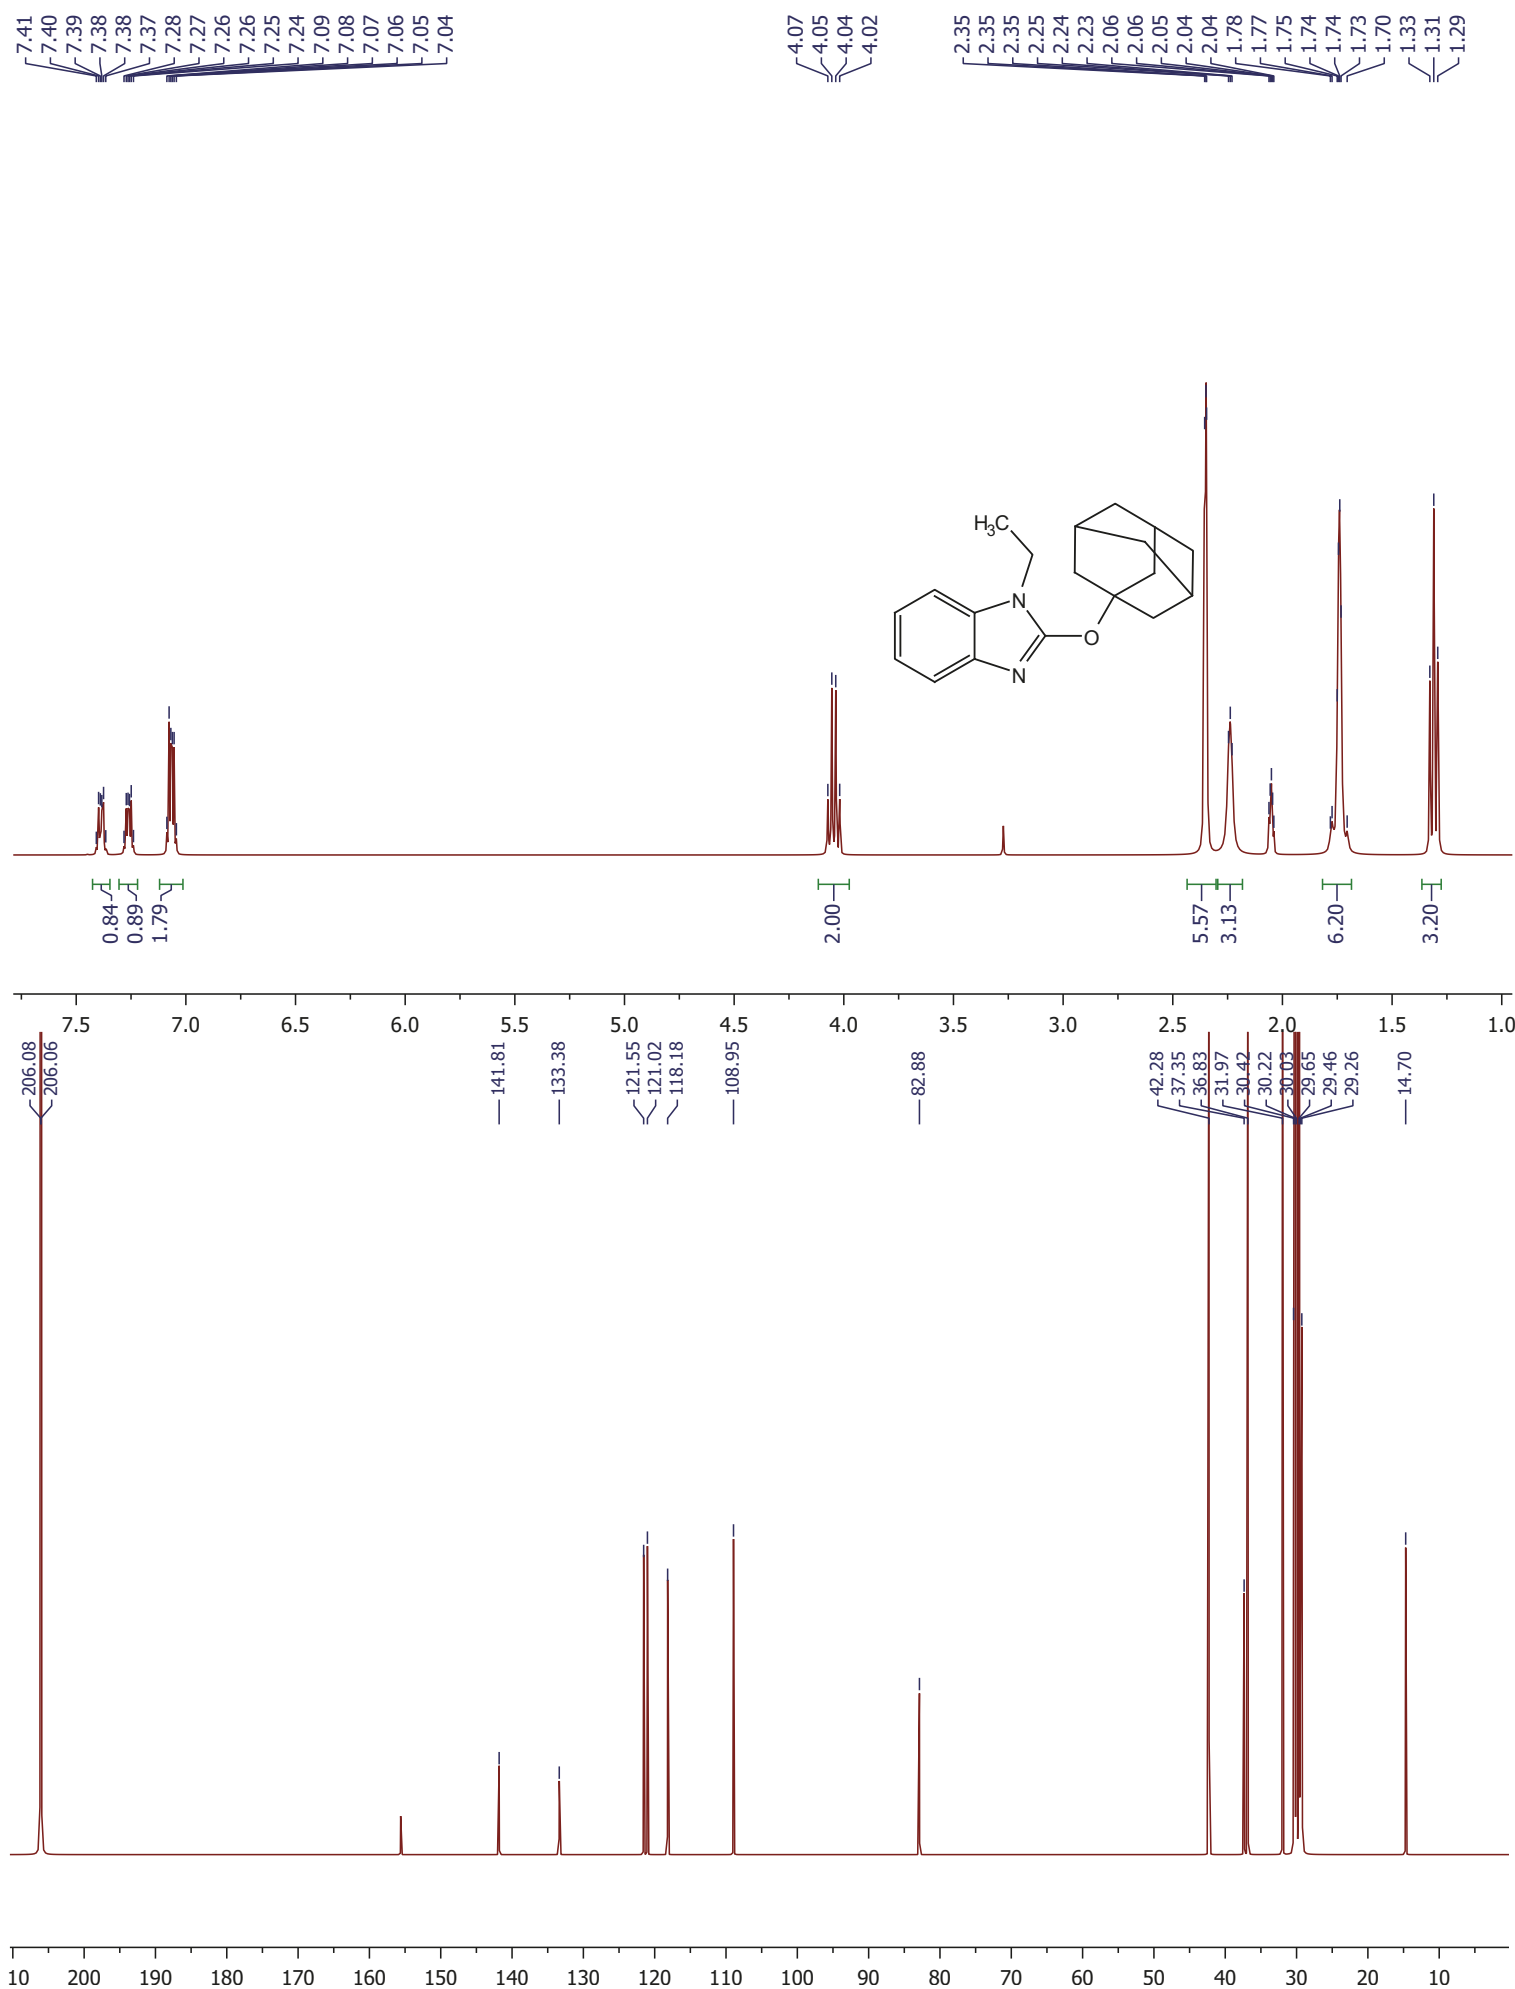



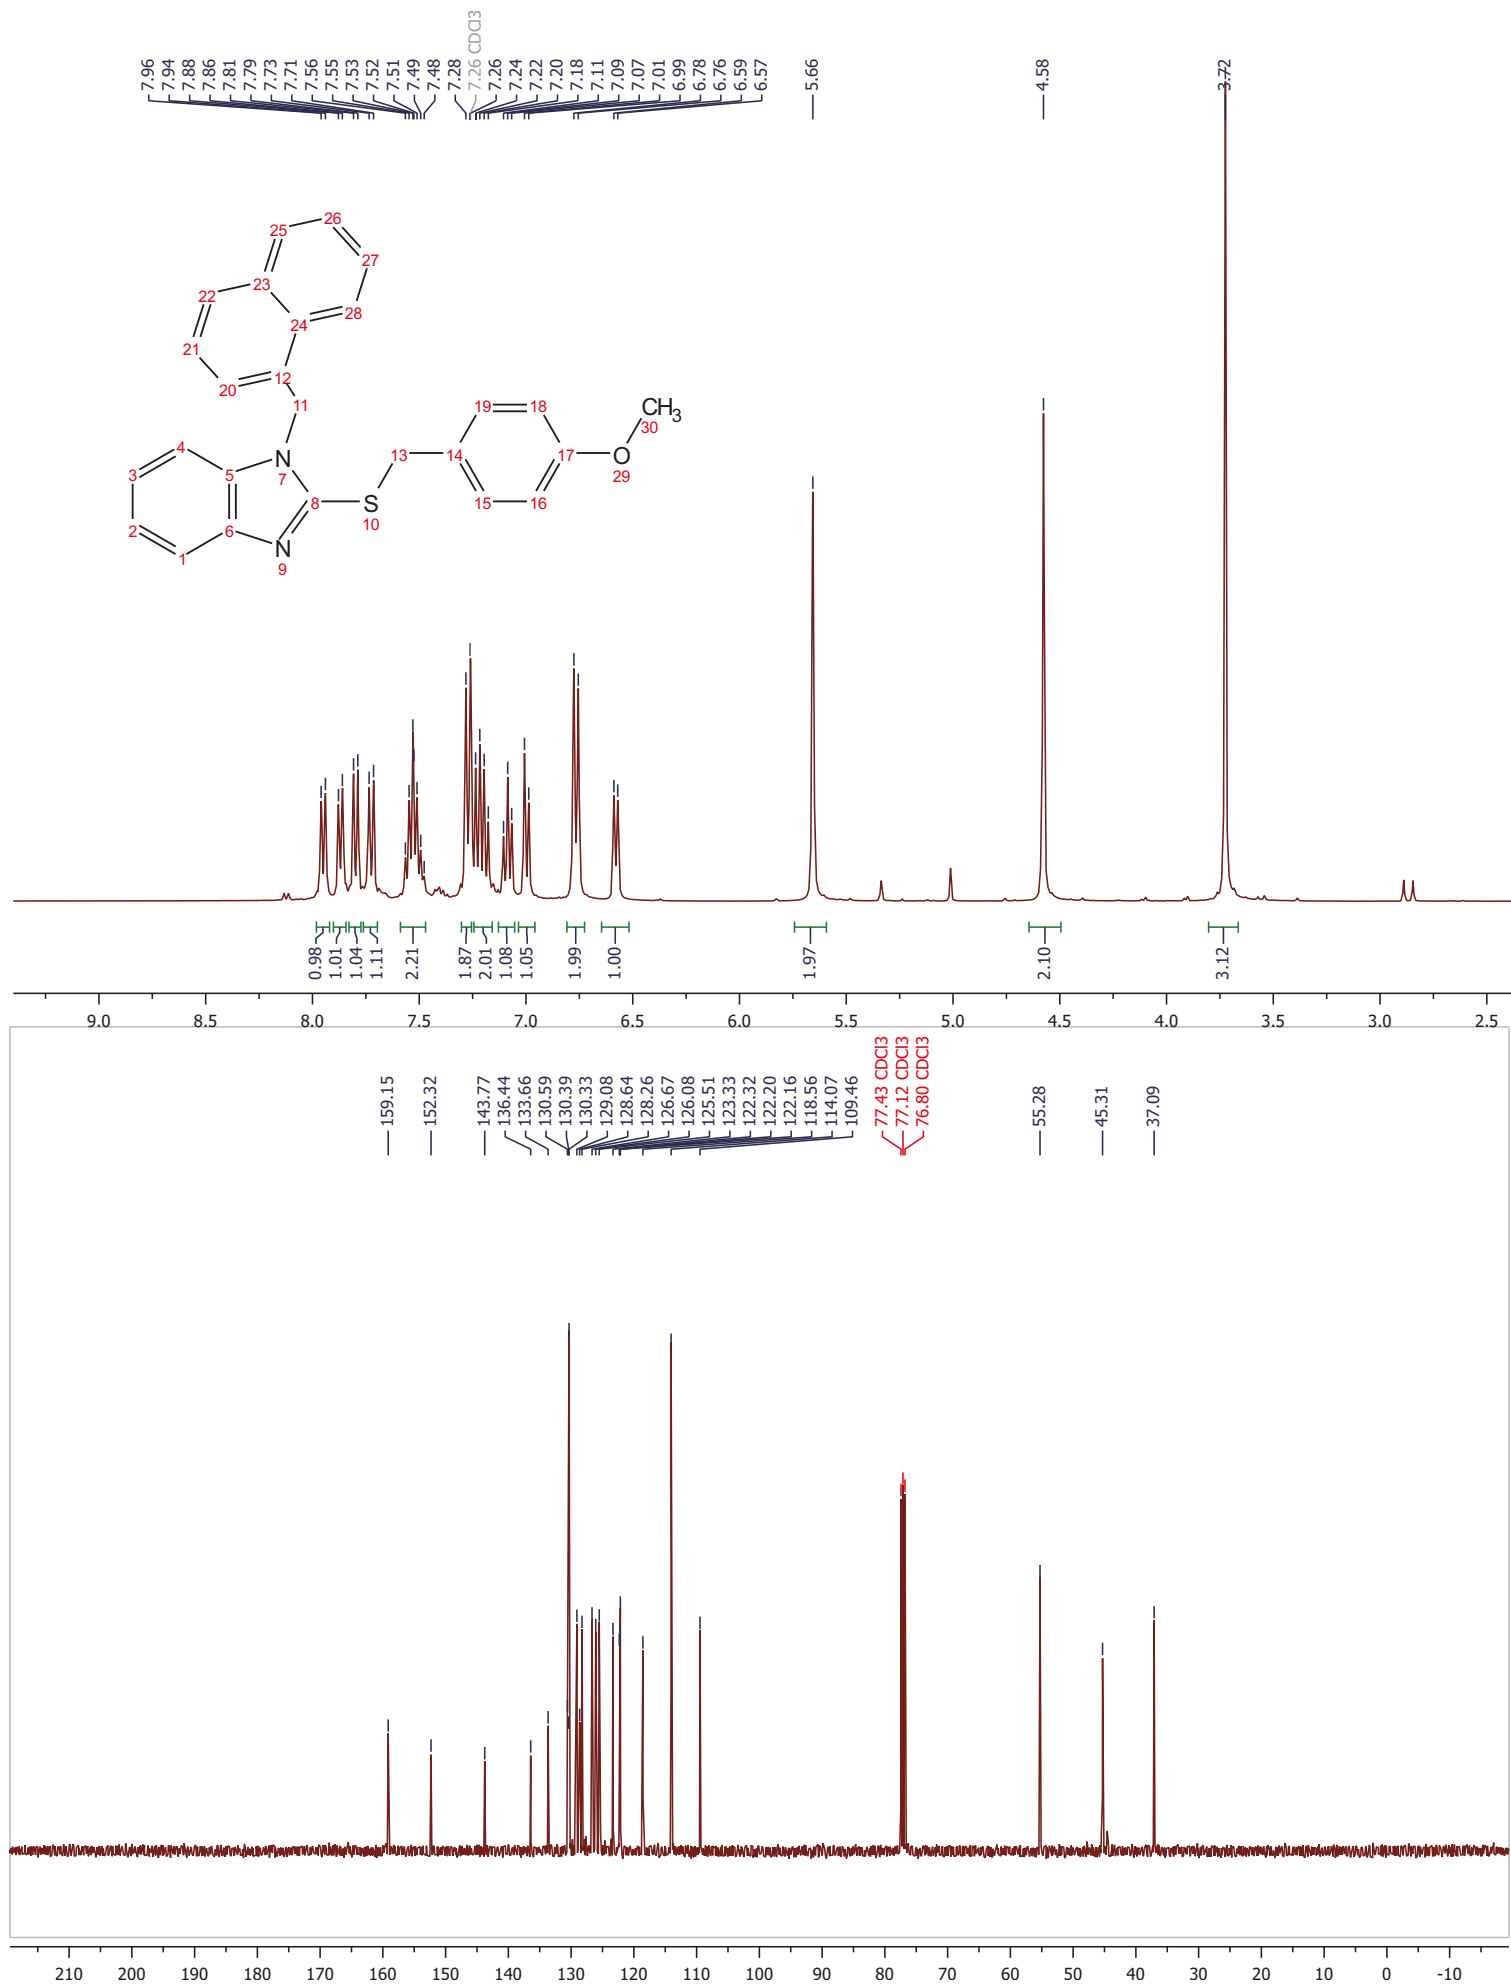

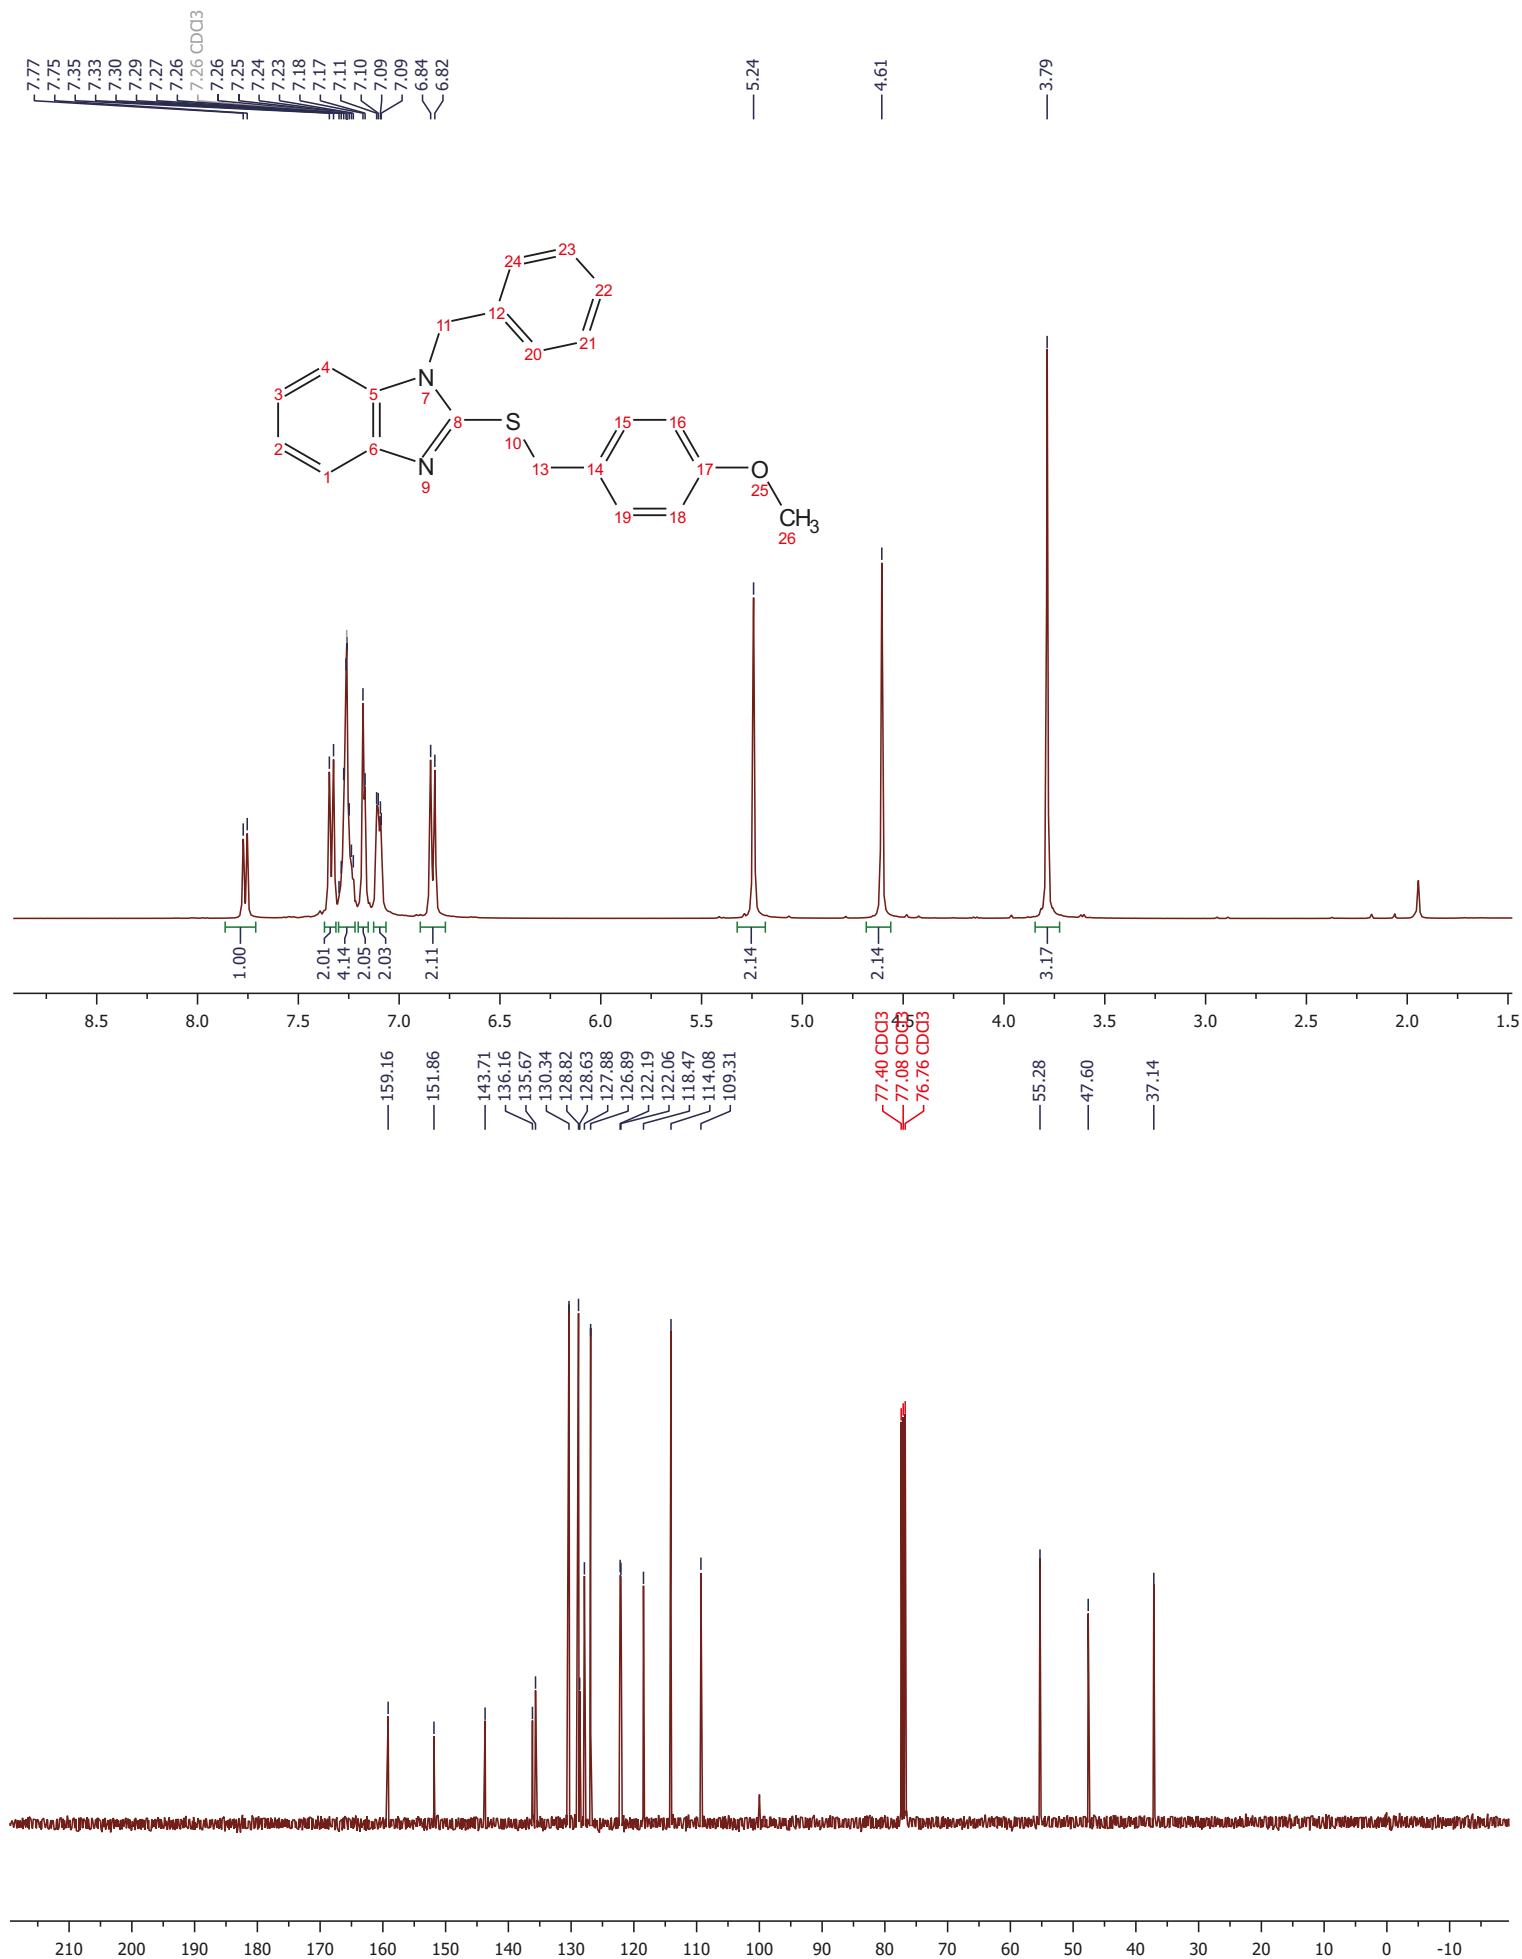

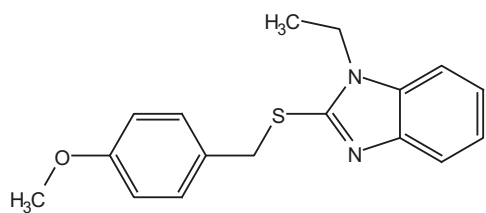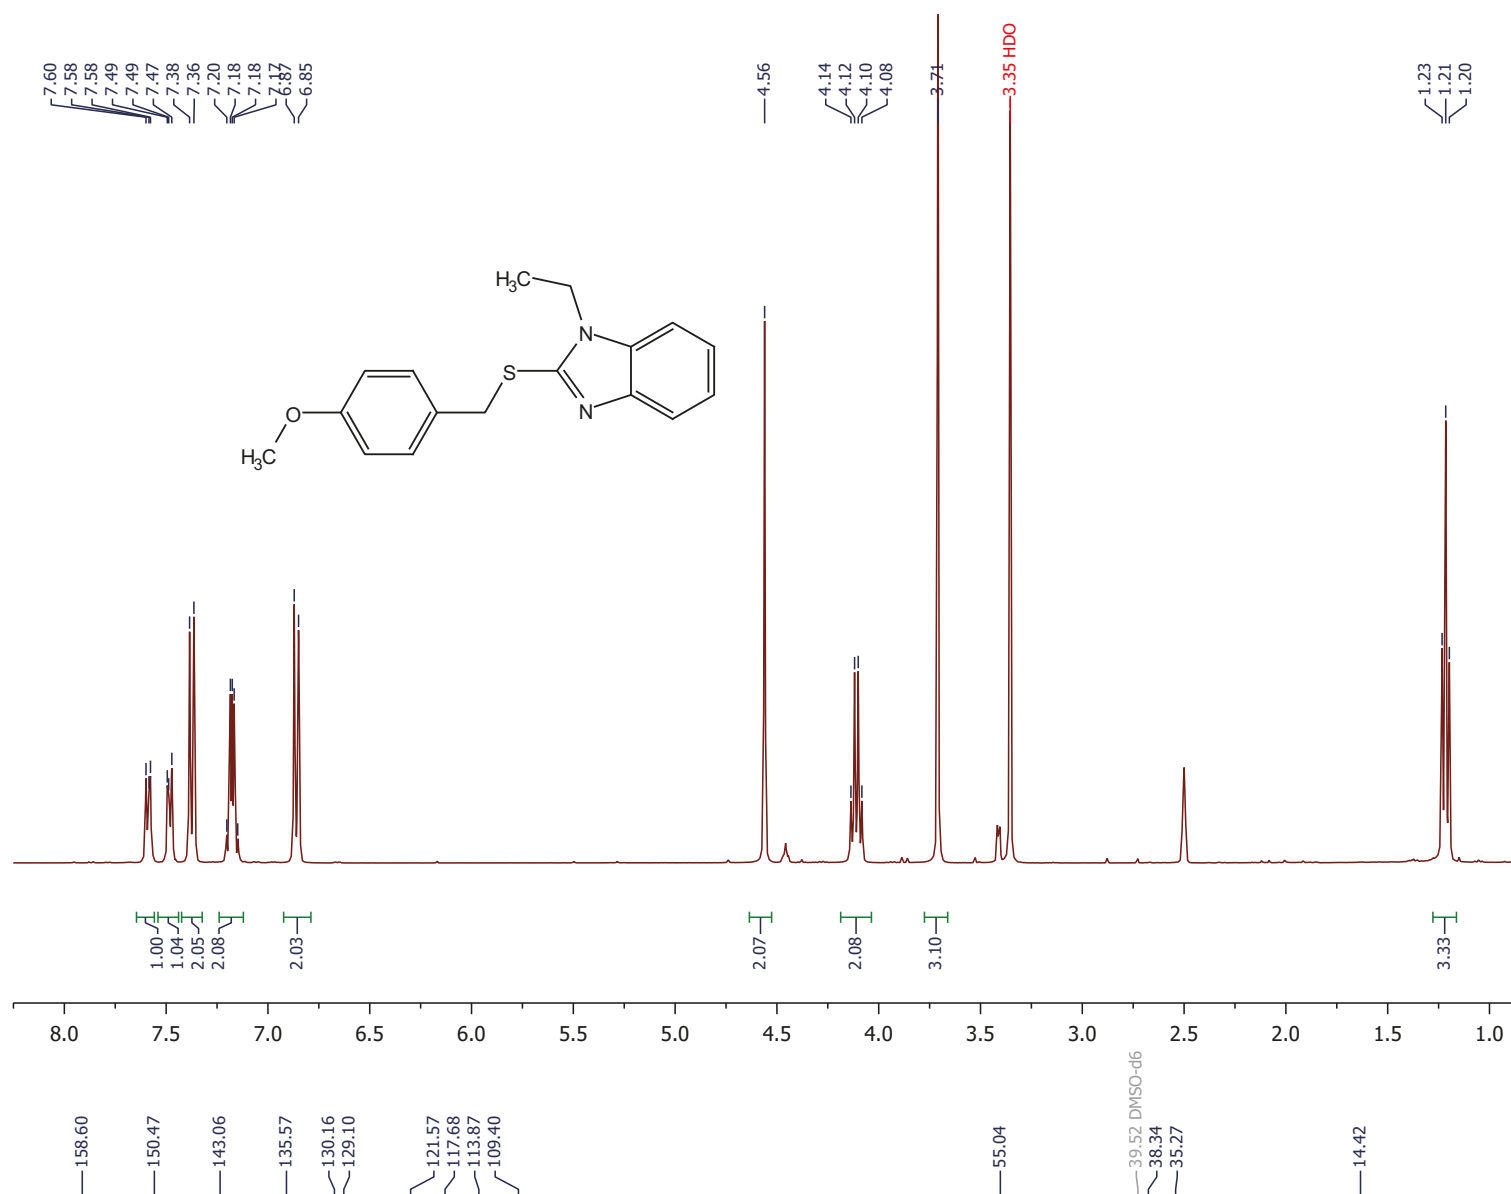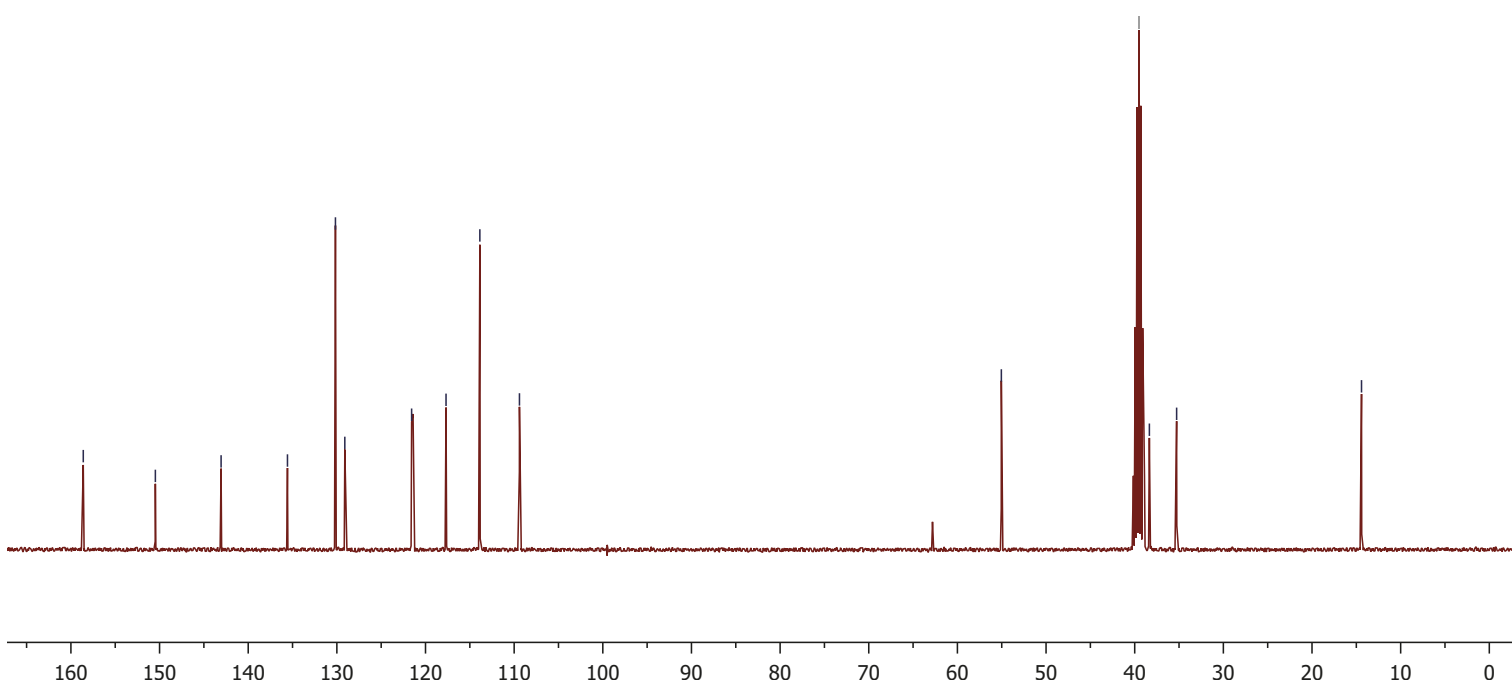

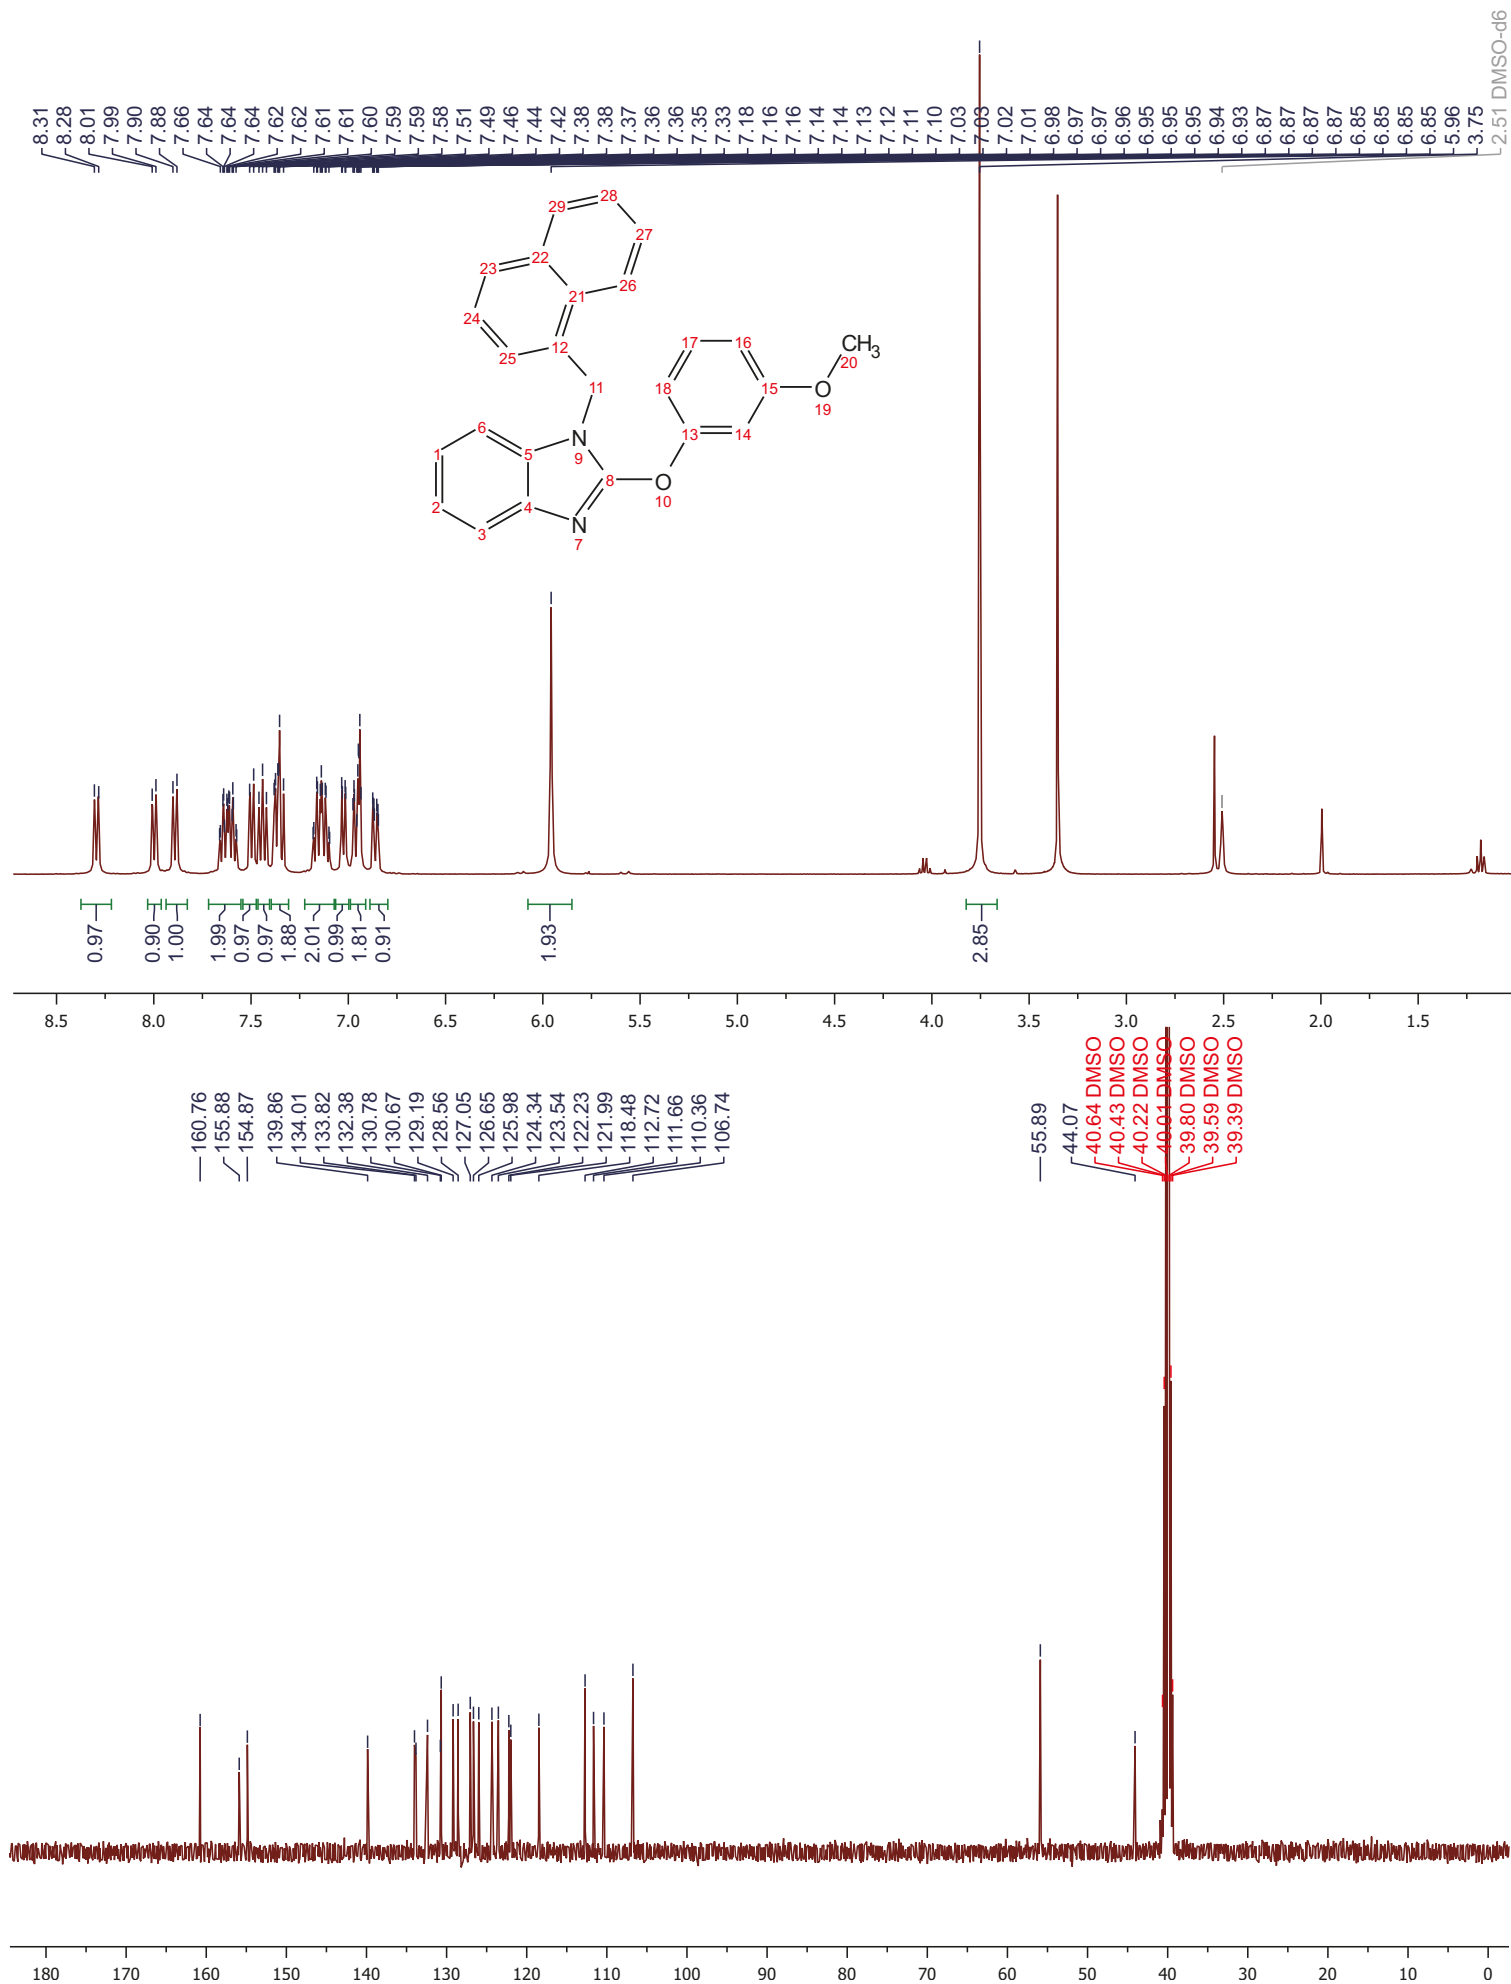

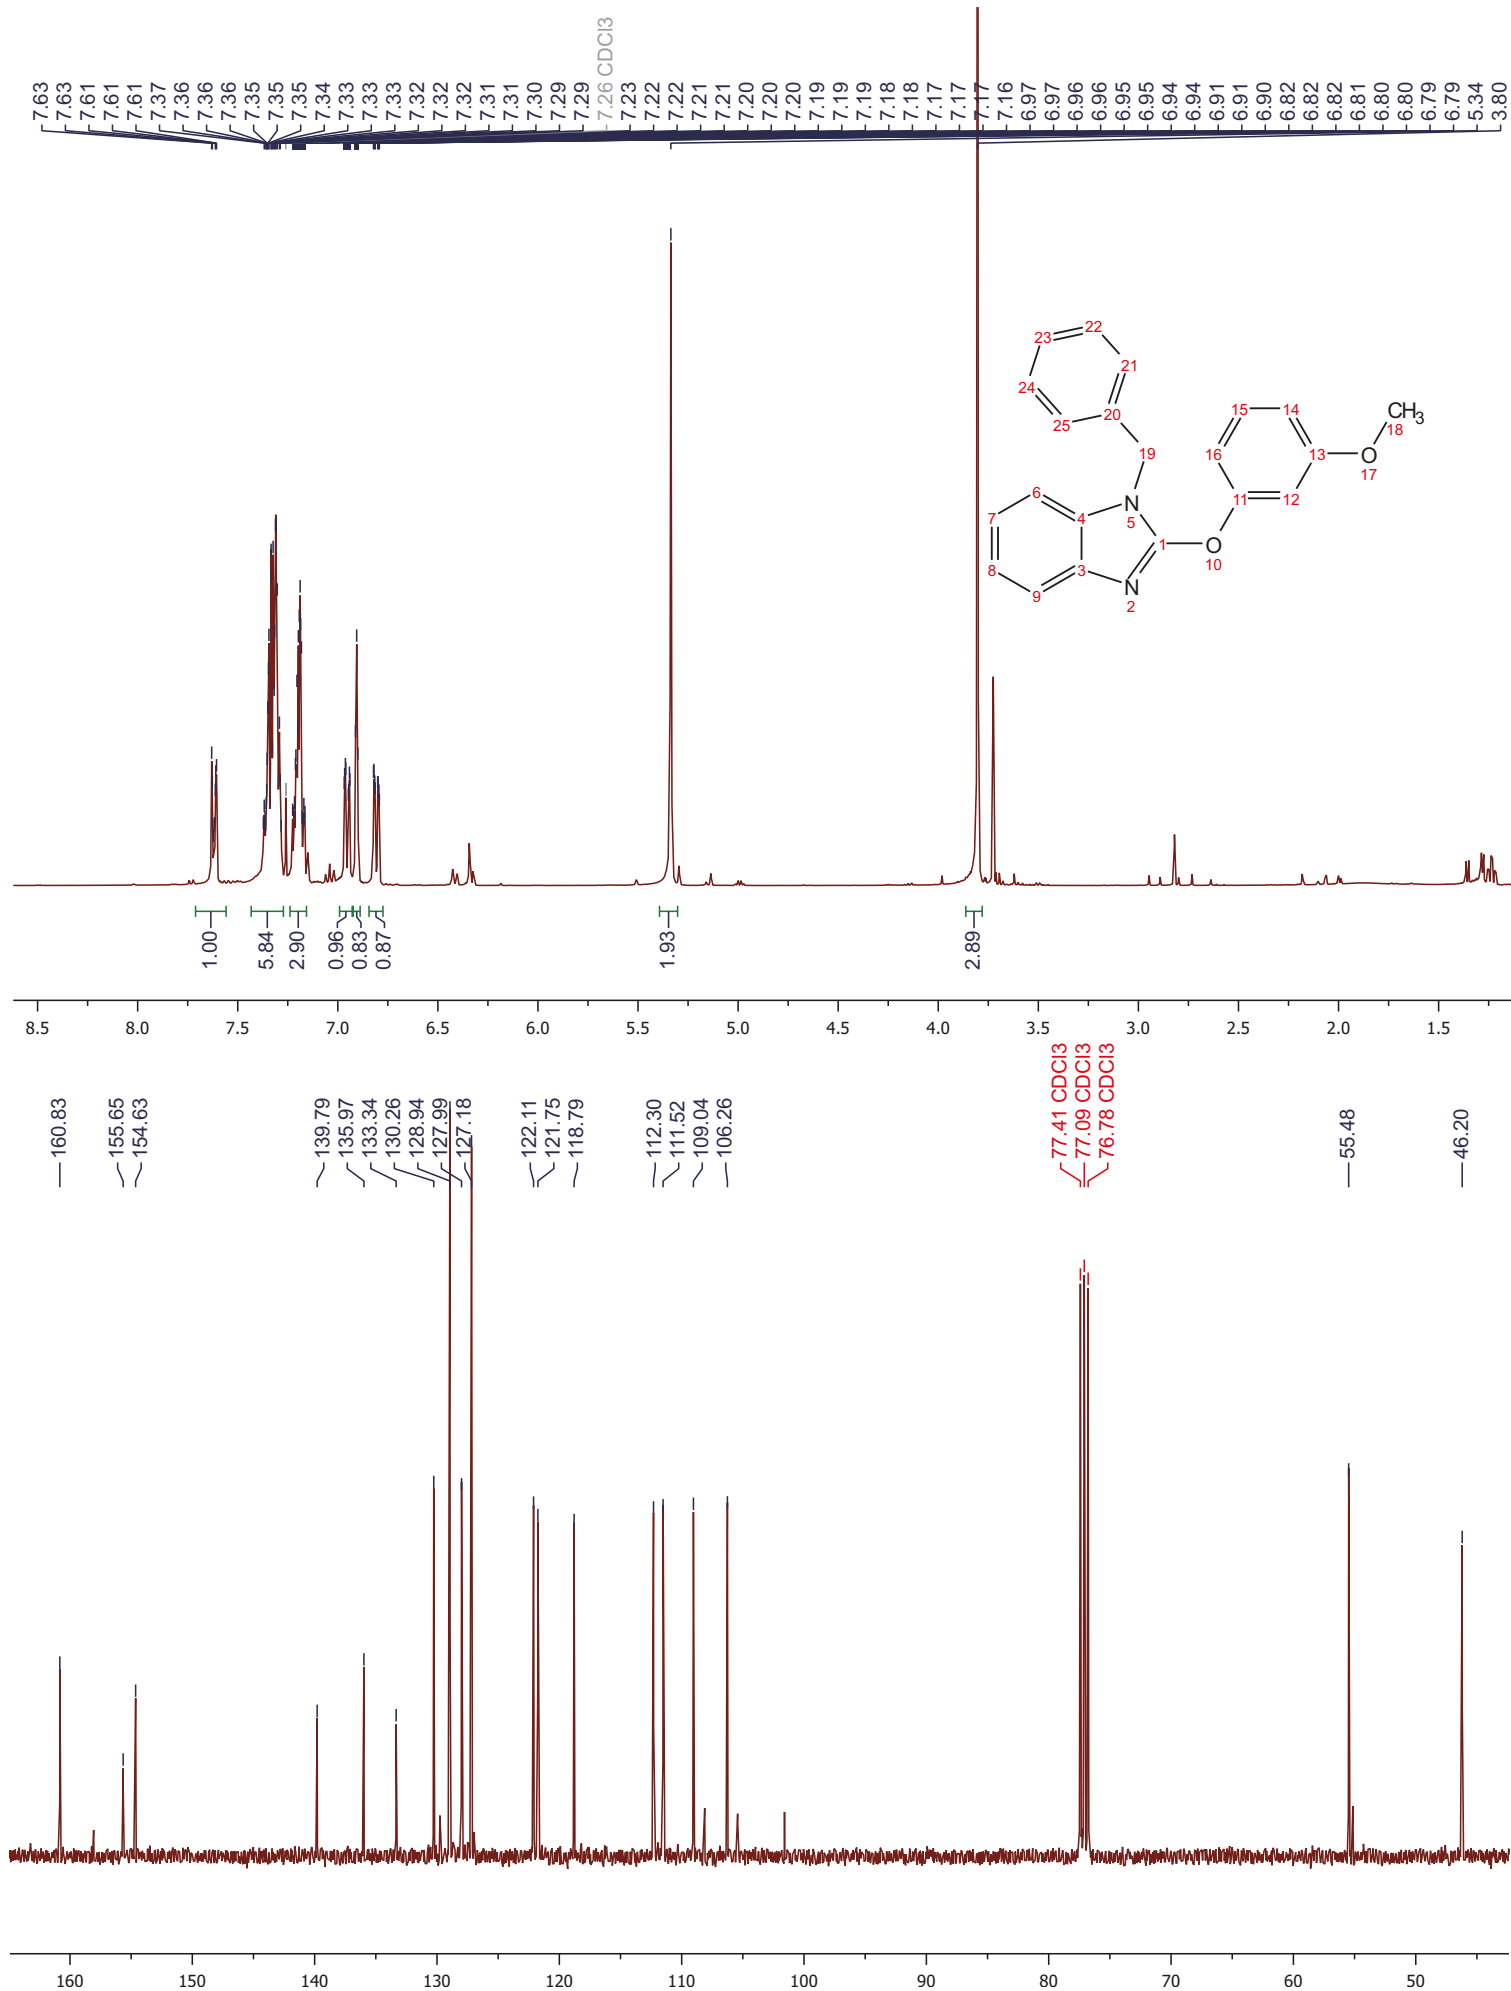

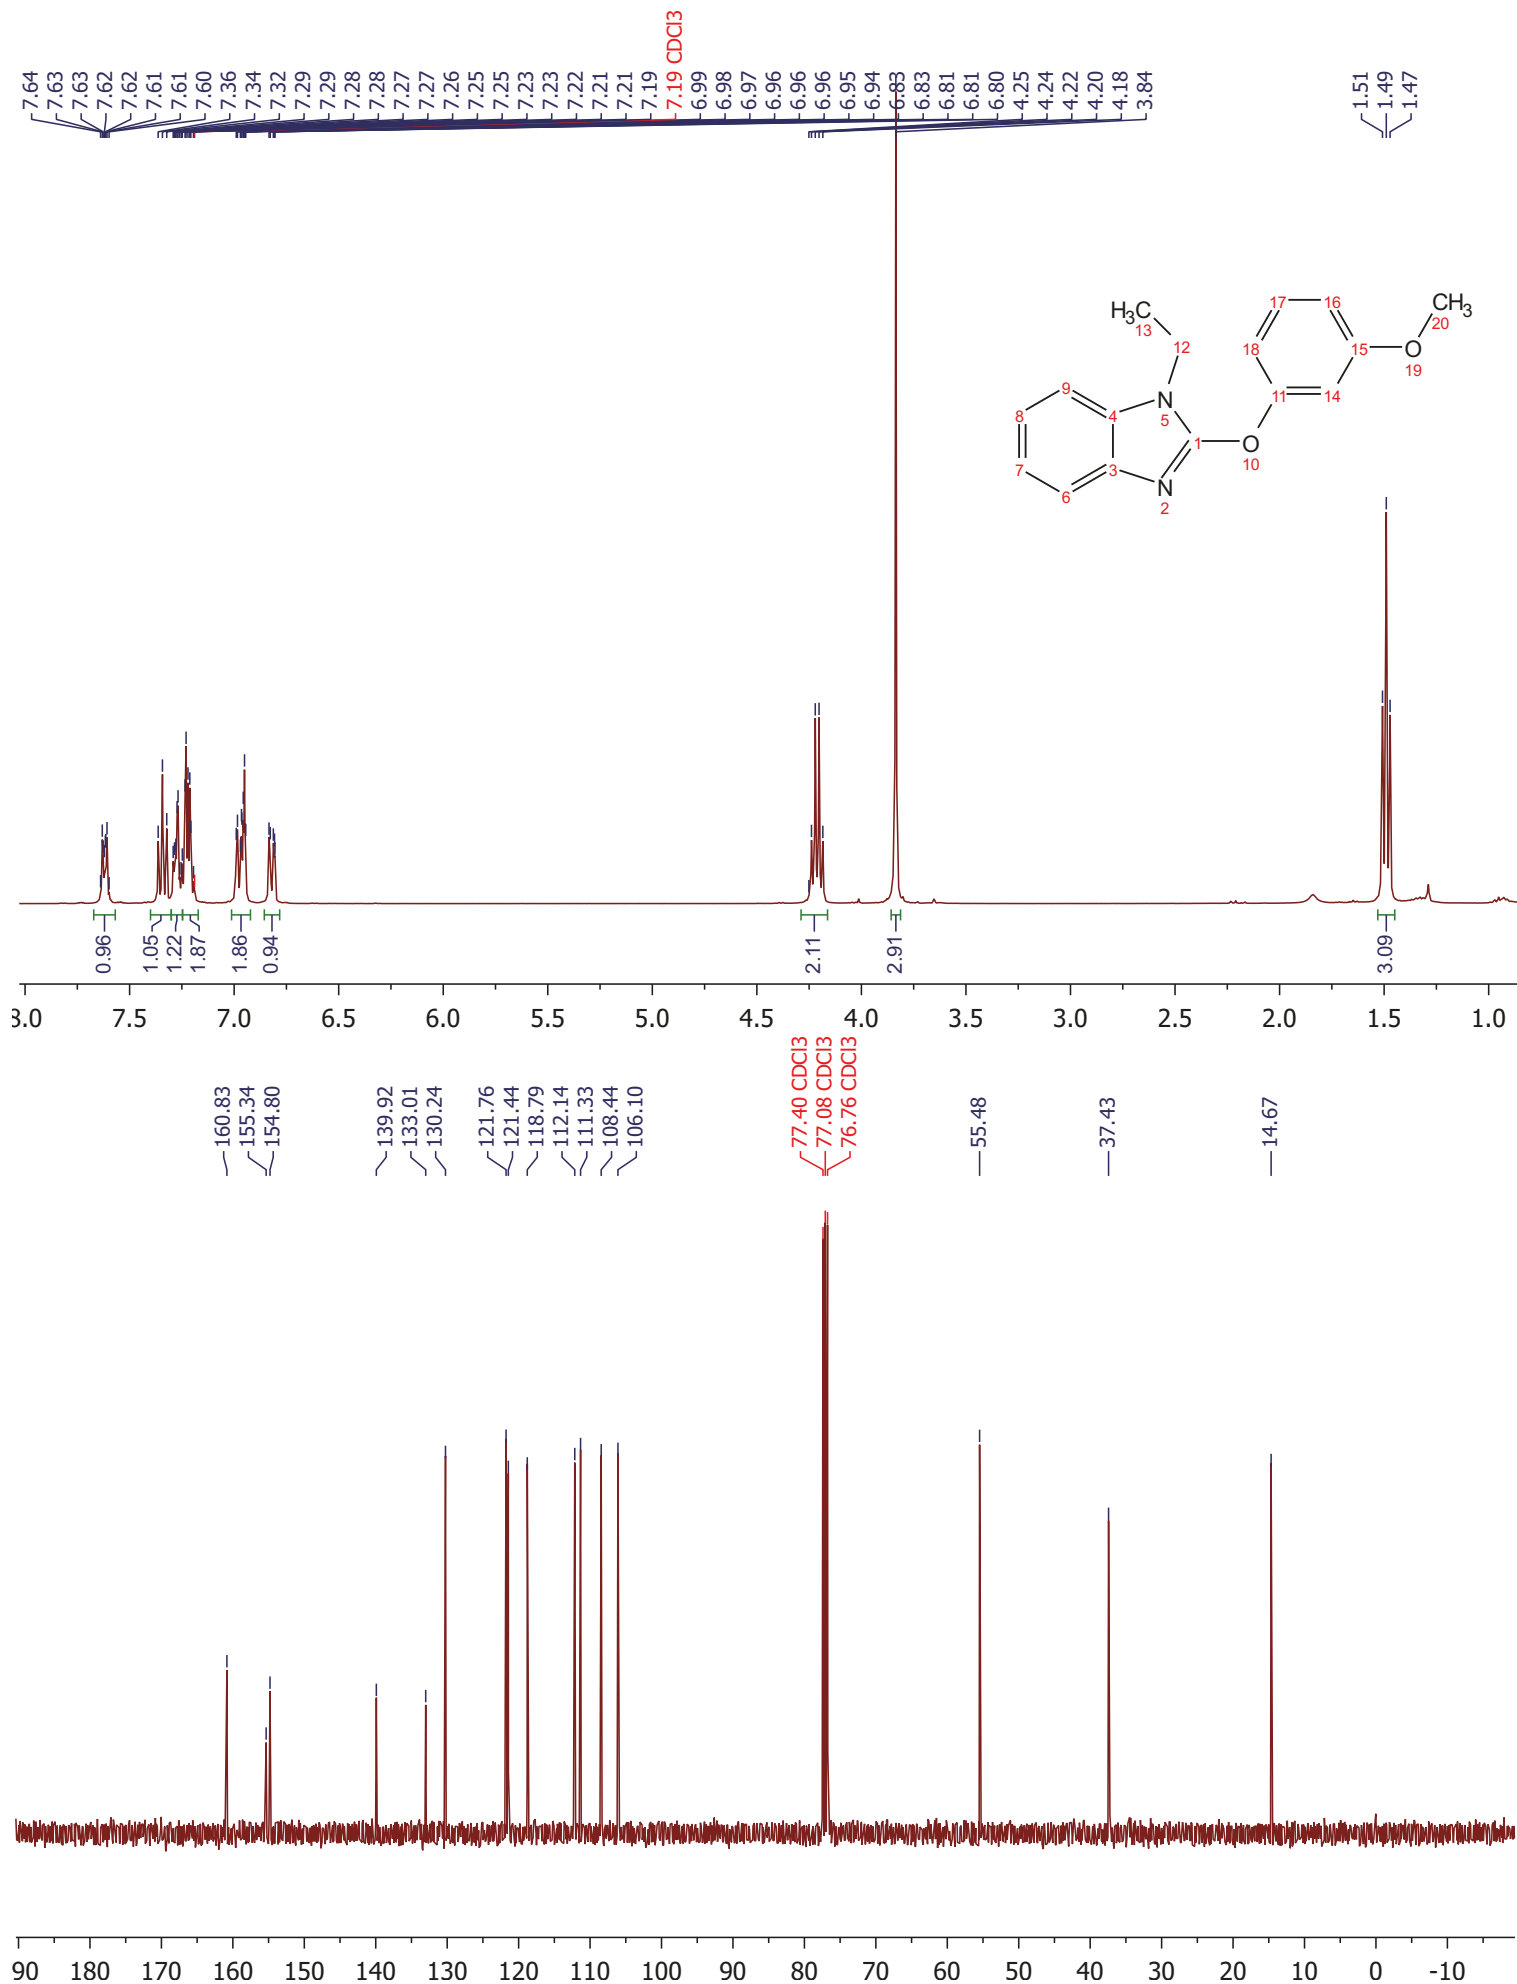

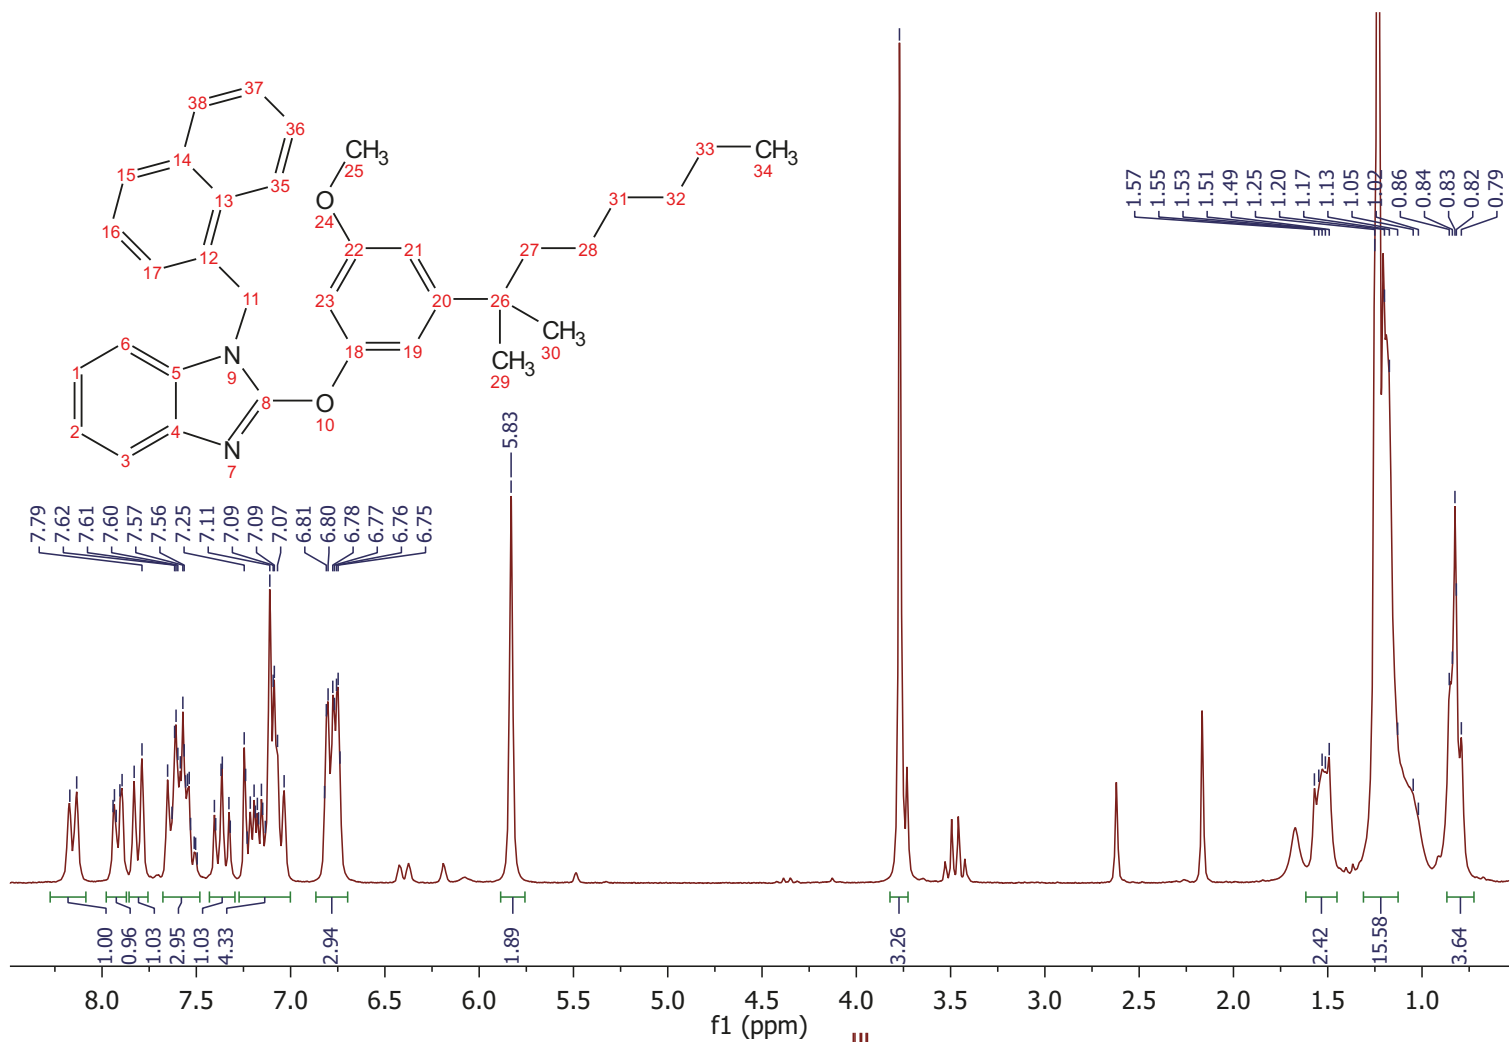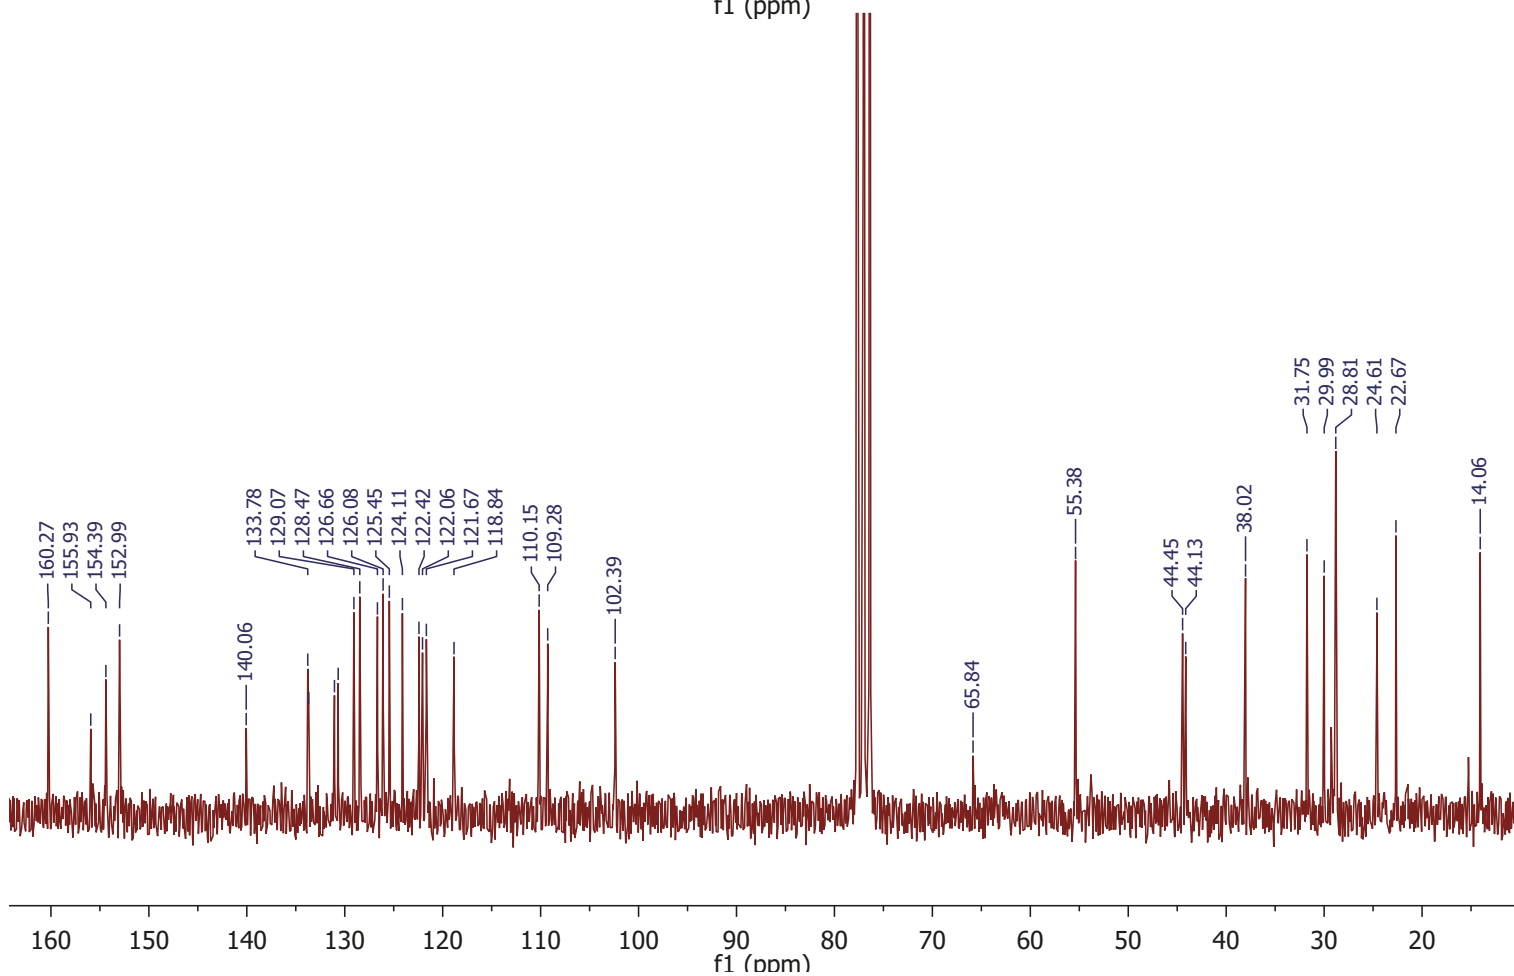

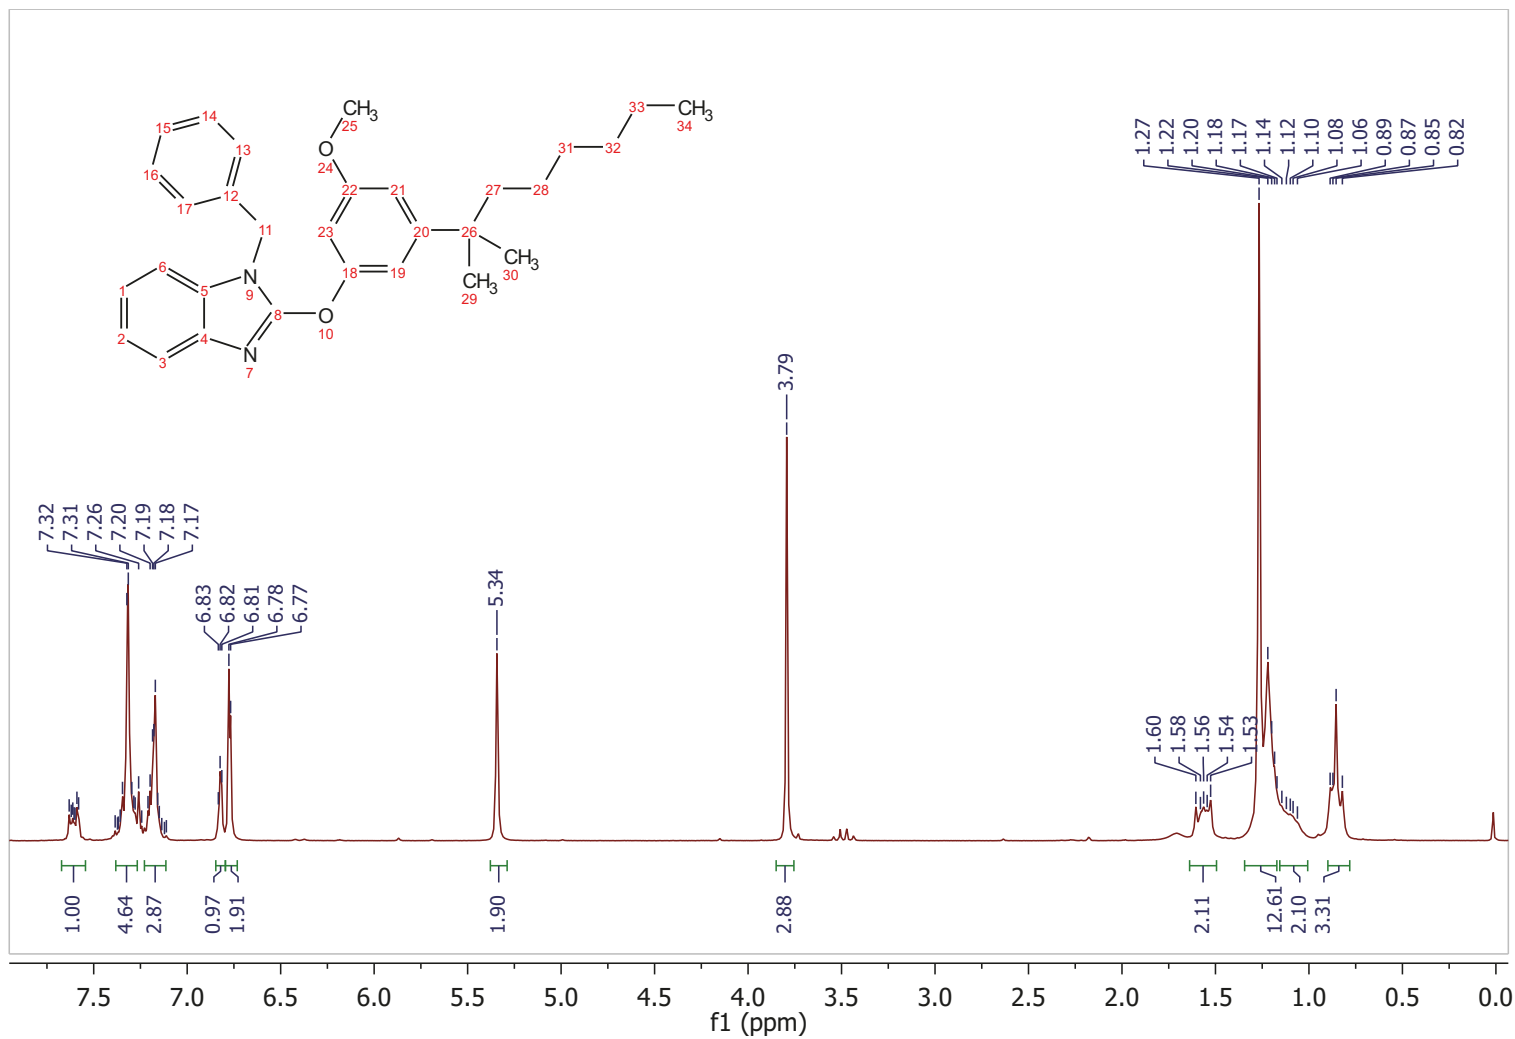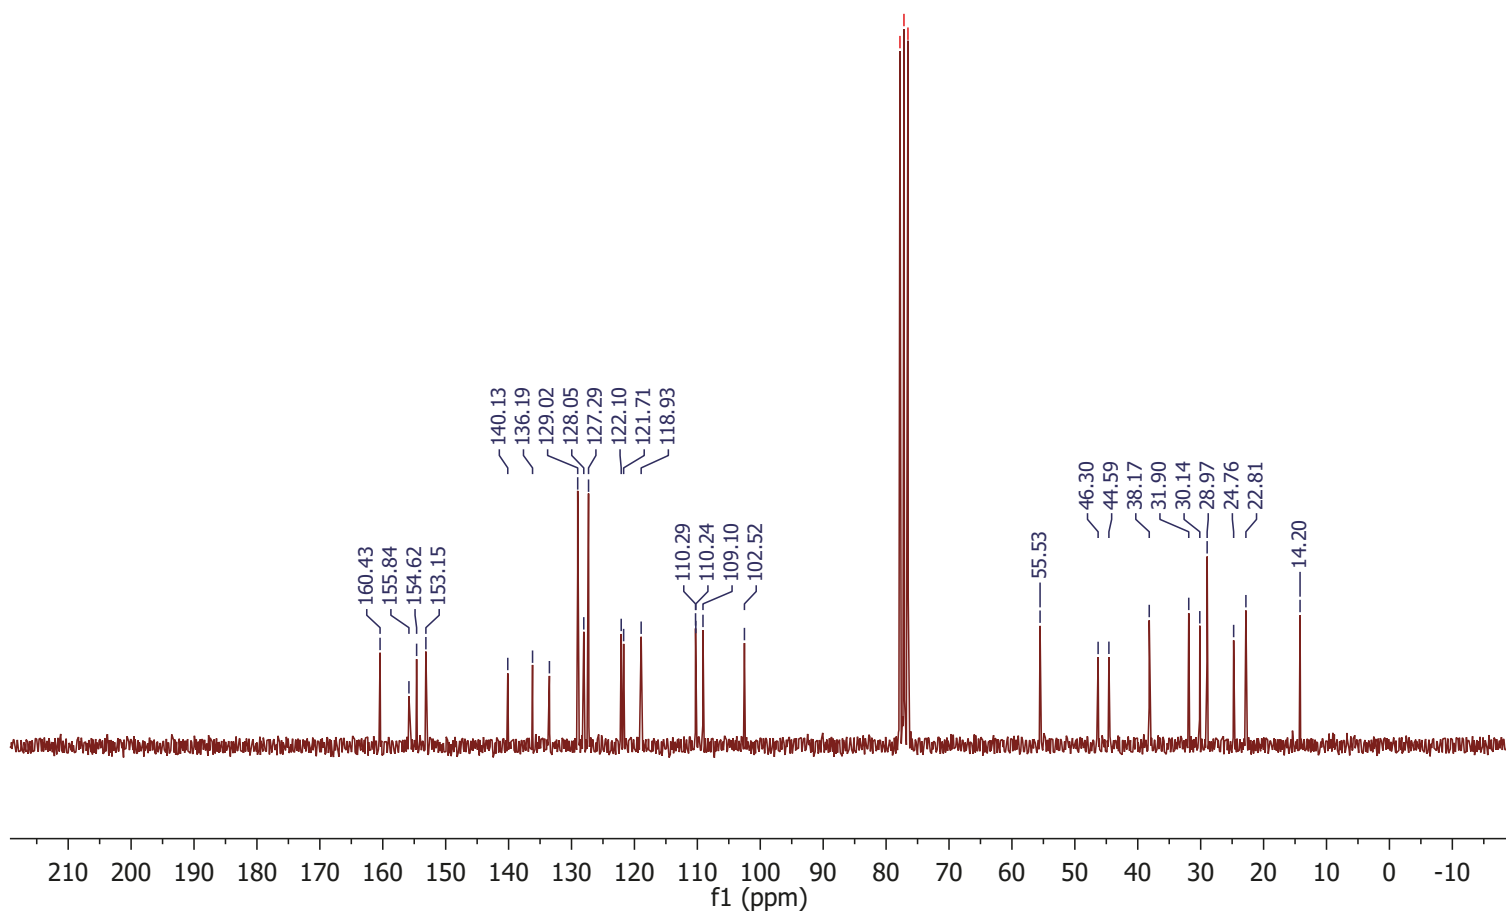



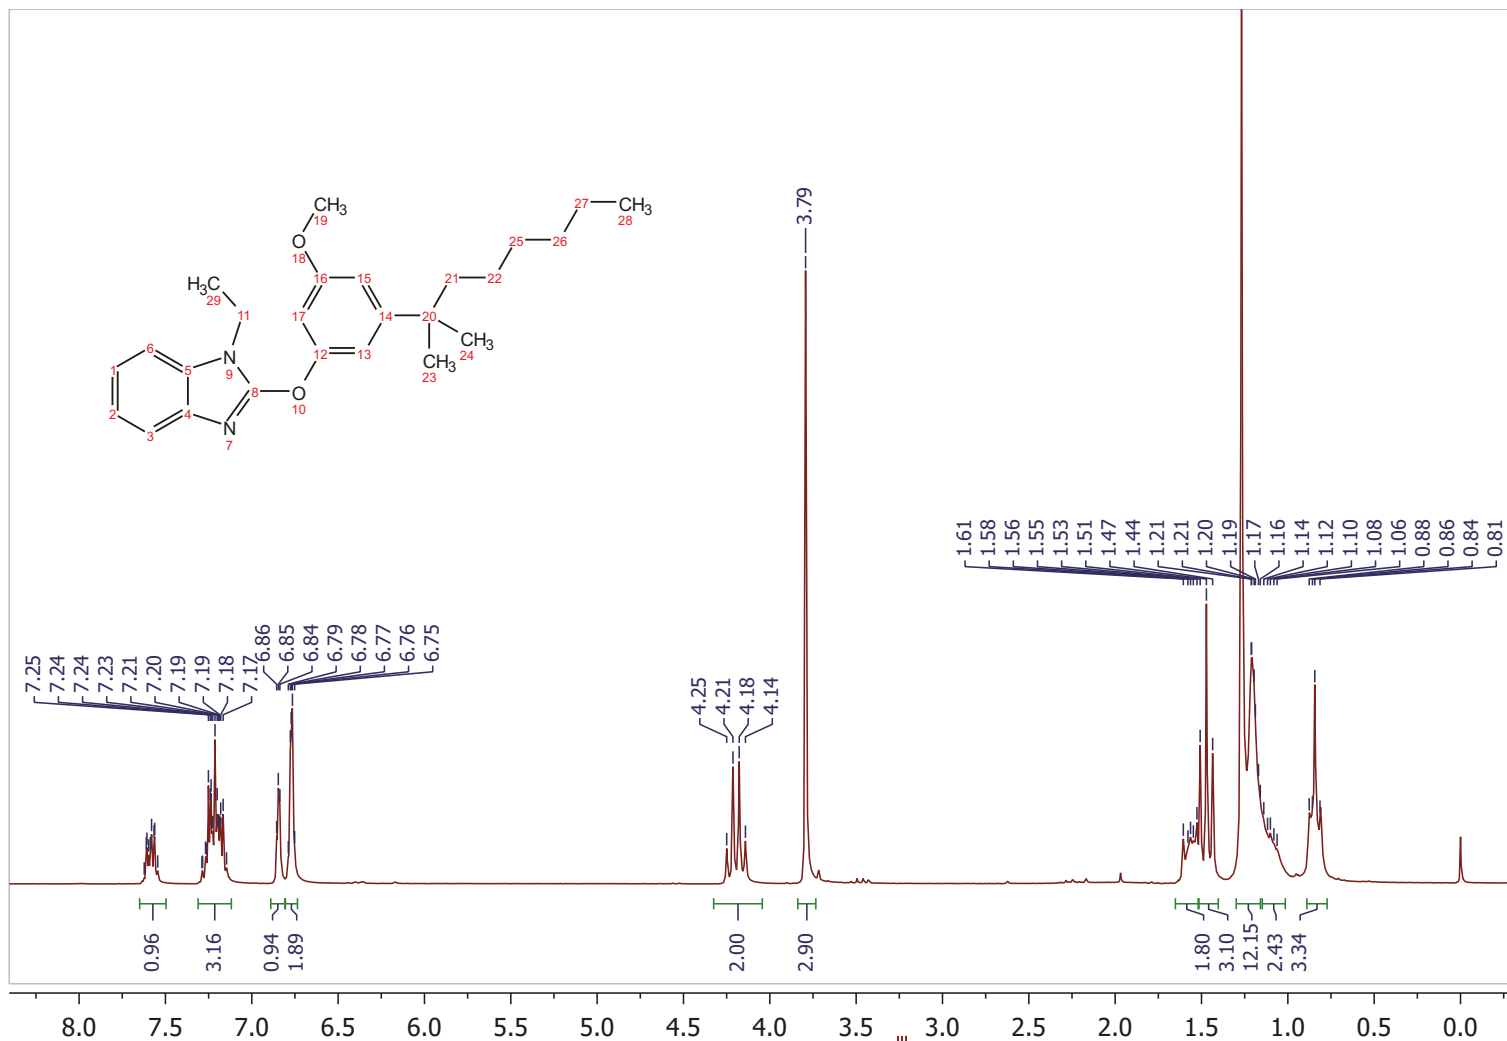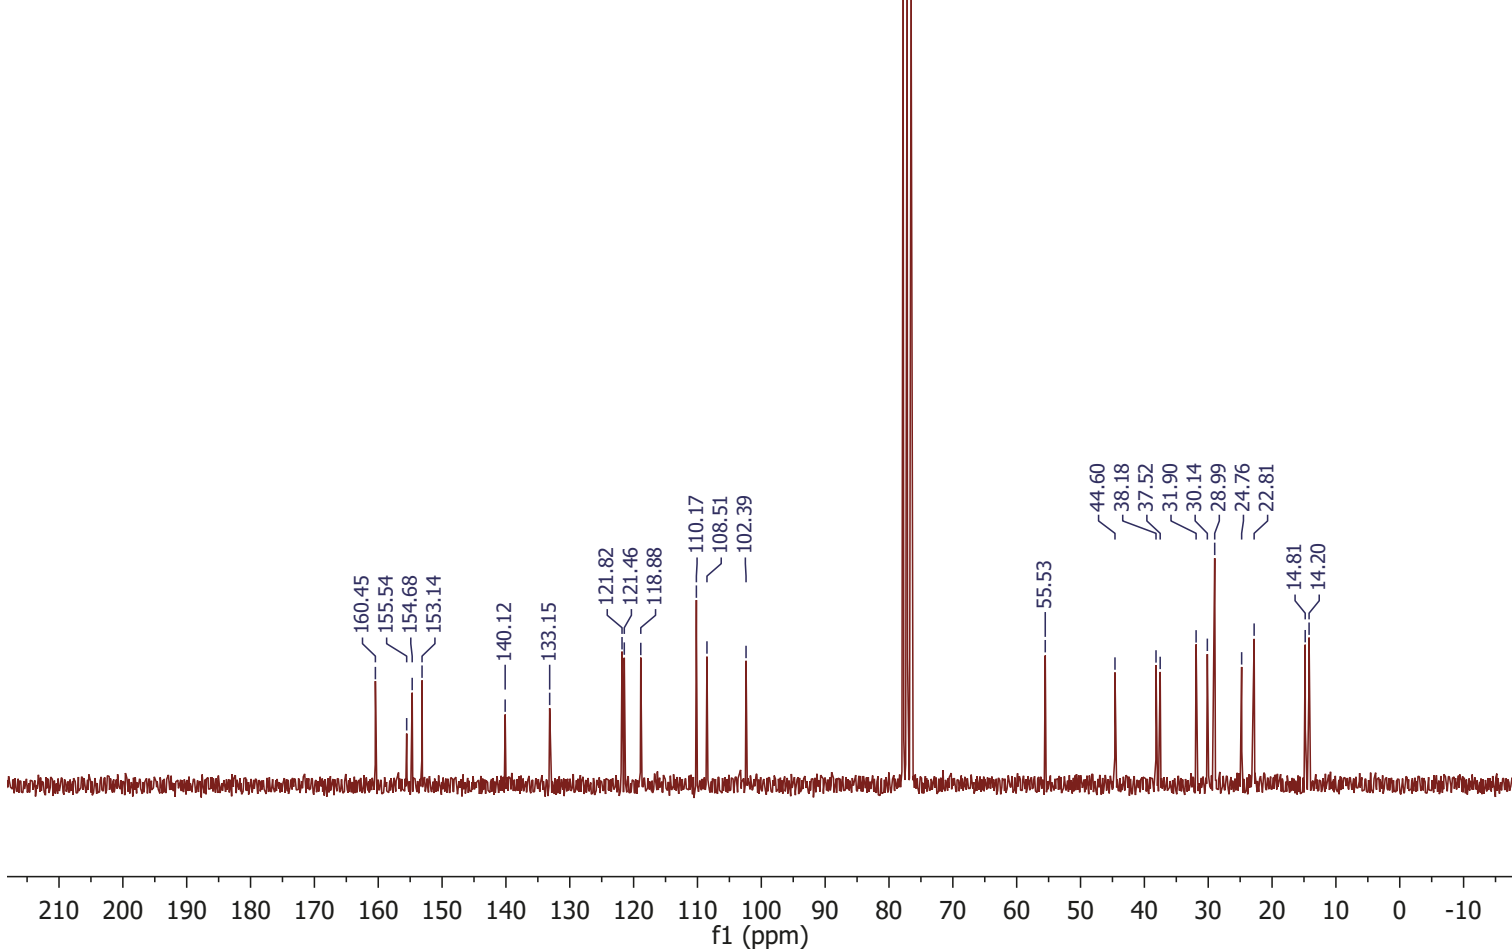

Supplement: s1 [file s1]
